# Supplementary material for: Aged microglia promote peripheral T cell infiltration by reprogramming the microenvironment of neurogenic niches
Source: Immun Ageing. 2022 Jul 25;19:34. doi: 10.1186/s12979-022-00289-6 (PMC9310471; doi:10.1186/s12979-022-00289-6)
Supplement: Supplementary file 3 — Additional file 3: Supplementary Table 2. Interaction between T cells and resident cells in SVZ (R-HSA-198933 restricted). [file 12979_2022_289_MOESM3_ESM.xlsx]

## Sheet: Fig1E
Supplementary Table 2 | Interaction between T cells and resident cells in SVZ (R-HSA-198933 restricted).
Cluster.A	Cluster.B	inter.GeneName.A	inter.GeneName.B	inter.LogFC.A	inter.LogFC.B	inter.PVal.A	inter.PVal.B	inter.Exprs.A	inter.Exprs.B	inter.Experiments.Score	inter.Database.Score	inter.Predicted.Score	inter.Combined.Score	inter.Power	inter.Confidence
aNSCs/NPCs	T cells	Acvr2b	Cd247	0.19076	0.776987	1	0	0.217398	0.439521	0	0	165	165	0.095551	0
aNSCs/NPCs	T cells	Bmpr1a	Cd247	0.431525	0.776987	4.32e-11	0	0.402707	0.439521	0	0	155	155	0.176998	0
aNSCs/NPCs	T cells	Bmpr1a	Cd8a	0.431525	1.83975	4.32e-11	0	0.402707	1.41259	0	0	160	160	0.568861	0
aNSCs/NPCs	T cells	Bmpr1a	Itga4	0.431525	0.946421	4.32e-11	9.04e-224	0.402707	0.634668	0	0	193	193	0.255585	0
aNSCs/NPCs	T cells	Bmpr1a	Itgb1	0.431525	0.212652	4.32e-11	0.683684	0.402707	0.556815	0	0	314	314	0.224233	0
aNSCs/NPCs	T cells	Bmpr1a	Itgb2	0.431525	0.358083	4.32e-11	1.11e-06	0.402707	0.411177	0	0	322	322	0.165584	0
aNSCs/NPCs	T cells	Egfr	Itga4	1.15087	0.946421	1.98e-214	9.04e-224	0.832029	0.634668	0	0	311	311	0.528062	0
aNSCs/NPCs	T cells	Egfr	Itgal	1.15087	0.712307	1.98e-214	8.38e-179	0.832029	0.400804	0	0	180	180	0.333481	0
aNSCs/NPCs	T cells	Egfr	Itgb1	1.15087	0.212652	1.98e-214	0.683684	0.832029	0.556815	0	0	610	610	0.463286	0
aNSCs/NPCs	T cells	Egfr	Itgb2	1.15087	0.358083	1.98e-214	1.11e-06	0.832029	0.411177	0	0	302	302	0.342111	0
aNSCs/NPCs	T cells	Egfr	Klrk1	1.15087	1.11257	1.98e-214	1.94e-263	0.832029	0.524609	0	0	380	380	0.43649	0
aNSCs/NPCs	T cells	Fgfr3	Itgb1	0.152476	0.212652	0.114349	0.683684	0.286852	0.556815	0	0	284	284	0.159723	0
aNSCs/NPCs	T cells	Fgfr3	Itgb2	0.152476	0.358083	0.114349	1.11e-06	0.286852	0.411177	0	0	181	181	0.117947	0
aNSCs/NPCs	T cells	Fgfr3	Itgb7	0.152476	0.615201	0.114349	2.59e-190	0.286852	0.345574	0	0	245	245	0.0991284	0
aNSCs/NPCs	T cells	Gria2	Itgb1	0.363721	0.212652	1.28e-05	0.683684	0.43331	0.556815	0	0	220	220	0.241273	0
aNSCs/NPCs	T cells	Gria2	Itgb2	0.363721	0.358083	1.28e-05	1.11e-06	0.43331	0.411177	0	0	158	158	0.178167	0
aNSCs/NPCs	T cells	Notch1	Klrk1	0.563982	1.11257	6.7e-20	1.94e-263	0.701238	0.524609	0	0	152	152	0.367876	0
aNSCs/NPCs	T cells	Egfr	Cd3d	1.15087	2.18853	1.98e-214	0	0.832029	1.89805	0	900	68	902	1.57923	0
aNSCs/NPCs	T cells	Egfr	Cd3g	1.15087	2.51845	1.98e-214	0	0.832029	2.27827	0	900	76	903	1.89559	0
aNSCs/NPCs	T cells	Egfr	B2m	1.15087	0.464139	1.98e-214	1.59e-27	0.832029	3.55004	0	0	351	351	2.95373	0
aNSCs/NPCs	T cells	Grin2b	B2m	0.202778	0.464139	1.18e-09	1.59e-27	0.14544	3.55004	0	0	181	181	0.516317	0
aNSCs/NPCs	T cells	Notch1	B2m	0.563982	0.464139	6.7e-20	1.59e-27	0.701238	3.55004	0	0	236	236	2.48942	0
aNSCs/NPCs	T cells	Egfr	Cd247	1.15087	0.776987	1.98e-214	0	0.832029	0.439521	0	0	270	270	0.365694	0
aNSCs/NPCs	T cells	Epha4	Cd247	0.217816	0.776987	0.00231347	0	0.237945	0.439521	0	0	163	163	0.104582	0
aNSCs/NPCs	T cells	Notch1	Cd3e	0.563982	1.79275	6.7e-20	0	0.701238	1.38202	0	0	182	182	0.969125	0
aNSCs/NPCs	T cells	Dner	Itga4	0.291315	0.946421	1.28e-11	9.04e-224	0.184444	0.634668	0	0	155	155	0.117061	0
aNSCs/NPCs	T cells	Notch1	Itga4	0.563982	0.946421	6.7e-20	9.04e-224	0.701238	0.634668	0	0	232	232	0.445053	0
aNSCs/NPCs	T cells	Notch1	Itgal	0.563982	0.712307	6.7e-20	8.38e-179	0.701238	0.400804	0	0	151	151	0.281059	0
aNSCs/NPCs	T cells	Notch1	Itgb1	0.563982	0.212652	6.7e-20	0.683684	0.701238	0.556815	0	0	399	399	0.39046	0
aNSCs/NPCs	T cells	Plxnb2	Itgb1	0.172921	0.212652	1	0.683684	0.259795	0.556815	0	0	195	195	0.144658	0
aNSCs/NPCs	T cells	Ptprs	Itgb1	0.709841	0.212652	6.29e-30	0.683684	0.66343	0.556815	0	0	220	220	0.369407	0
aNSCs/NPCs	T cells	Rpsa	Itgb1	0.583309	0.212652	8.38e-05	0.683684	2.66935	0.556815	0	0	177	177	1.48633	0
aNSCs/NPCs	T cells	Smo	Itgb1	0.201709	0.212652	0.767009	0.683684	0.194507	0.556815	0	0	348	348	0.108305	0
aNSCs/NPCs	T cells	Plxnb2	Itgb2	0.172921	0.358083	1	1.11e-06	0.259795	0.411177	0	0	206	206	0.106822	0
aNSCs/NPCs	T cells	Ptprs	Itgb2	0.709841	0.358083	6.29e-30	1.11e-06	0.66343	0.411177	0	0	195	195	0.272787	0
aNSCs/NPCs	T cells	Plxnb2	Itgb7	0.172921	0.615201	1	2.59e-190	0.259795	0.345574	0	0	152	152	0.0897785	0
aNSCs/NPCs	T cells	Ptprs	Itgb7	0.709841	0.615201	6.29e-30	2.59e-190	0.66343	0.345574	0	0	181	181	0.229264	0
aNSCs/NPCs	T cells	Plxnb2	Klrk1	0.172921	1.11257	1	1.94e-263	0.259795	0.524609	0	0	166	166	0.136291	0
Astrocytes/qNSCs	T cells	Itgav	Itgb1	0.366523	0.212652	0.0038575	0.683684	0.341954	0.556815	0	900	921	991	0.190405	0
Astrocytes/qNSCs	T cells	Itgav	Itgb2	0.366523	0.358083	0.0038575	1.11e-06	0.341954	0.411177	0	900	702	969	0.140603	0
Astrocytes/qNSCs	T cells	Itgav	Itgb7	0.366523	0.615201	0.0038575	2.59e-190	0.341954	0.345574	0	800	614	919	0.11817	0
Astrocytes/qNSCs	T cells	Bmpr1a	Cd247	0.421749	0.776987	4.78e-17	0	0.258752	0.439521	0	0	155	155	0.113727	0
Astrocytes/qNSCs	T cells	Bmpr1a	Cd8a	0.421749	1.83975	4.78e-17	0	0.258752	1.41259	0	0	160	160	0.365511	0
Astrocytes/qNSCs	T cells	Bmpr1a	Itga4	0.421749	0.946421	4.78e-17	9.04e-224	0.258752	0.634668	0	0	193	193	0.164221	0
Astrocytes/qNSCs	T cells	Bmpr1a	Itgb1	0.421749	0.212652	4.78e-17	0.683684	0.258752	0.556815	0	0	314	314	0.144077	0
Astrocytes/qNSCs	T cells	Bmpr1a	Itgb2	0.421749	0.358083	4.78e-17	1.11e-06	0.258752	0.411177	0	0	322	322	0.106393	0
Astrocytes/qNSCs	T cells	Bmpr1b	Cd247	0.628358	0.776987	3.51e-153	0	0.283385	0.439521	0	0	155	155	0.124554	0
Astrocytes/qNSCs	T cells	Bmpr1b	Itga4	0.628358	0.946421	3.51e-153	9.04e-224	0.283385	0.634668	0	0	200	200	0.179855	0
Astrocytes/qNSCs	T cells	Bmpr1b	Itgb1	0.628358	0.212652	3.51e-153	0.683684	0.283385	0.556815	0	0	247	247	0.157793	0
Astrocytes/qNSCs	T cells	Bmpr1b	Itgb2	0.628358	0.358083	3.51e-153	1.11e-06	0.283385	0.411177	0	0	231	231	0.116521	0
Astrocytes/qNSCs	T cells	Cd27	Cd160	0.869342	0.558399	4.46e-56	3.65e-208	0.572285	0.27683	0	0	588	588	0.158426	0
Astrocytes/qNSCs	T cells	Cd27	Crtam	0.869342	0.450056	4.46e-56	3.44e-176	0.572285	0.234432	0	0	384	384	0.134162	0
Astrocytes/qNSCs	T cells	Cd27	Klrk1	0.869342	1.11257	4.46e-56	1.94e-263	0.572285	0.524609	0	0	711	711	0.300226	0
Astrocytes/qNSCs	T cells	Csf2ra	Itgal	0.302317	0.712307	1	8.38e-179	0.318166	0.400804	0	0	167	167	0.127522	0
Astrocytes/qNSCs	T cells	Csf2ra	Itgb1	0.302317	0.212652	1	0.683684	0.318166	0.556815	0	0	201	201	0.17716	0
Astrocytes/qNSCs	T cells	Csf2ra	Itgb2	0.302317	0.358083	1	1.11e-06	0.318166	0.411177	0	0	307	307	0.130823	0
Astrocytes/qNSCs	T cells	Csf2ra	Klrd1	0.302317	1.07505	1	2e-298	0.318166	0.538661	0	0	188	188	0.171384	0
Astrocytes/qNSCs	T cells	Fgfr1	Itga4	0.644752	0.946421	3.48e-78	9.04e-224	0.387749	0.634668	0	0	160	160	0.246092	0
Astrocytes/qNSCs	T cells	Fgfr1	Itgb1	0.644752	0.212652	3.48e-78	0.683684	0.387749	0.556815	0	0	349	349	0.215905	0
Astrocytes/qNSCs	T cells	Fgfr1	Itgb2	0.644752	0.358083	3.48e-78	1.11e-06	0.387749	0.411177	0	0	167	167	0.159434	0
Astrocytes/qNSCs	T cells	Fgfr1	Itgb7	0.644752	0.615201	3.48e-78	2.59e-190	0.387749	0.345574	0	0	196	196	0.133996	0
Astrocytes/qNSCs	T cells	Fgfr3	Itgb1	1.60267	0.212652	0	0.683684	1.13062	0.556815	0	0	284	284	0.629544	0
Astrocytes/qNSCs	T cells	Fgfr3	Itgb2	1.60267	0.358083	0	1.11e-06	1.13062	0.411177	0	0	181	181	0.464883	0
Astrocytes/qNSCs	T cells	Fgfr3	Itgb7	1.60267	0.615201	0	2.59e-190	1.13062	0.345574	0	0	245	245	0.390712	0
Astrocytes/qNSCs	T cells	Gfra1	Itgb1	0.458383	0.212652	2.33e-34	0.683684	0.242429	0.556815	0	0	236	236	0.134988	0
Astrocytes/qNSCs	T cells	Gria2	Itgb1	1.4918	0.212652	1.91e-260	0.683684	0.959884	0.556815	0	0	220	220	0.534477	0
Astrocytes/qNSCs	T cells	Gria2	Itgb2	1.4918	0.358083	1.91e-260	1.11e-06	0.959884	0.411177	0	0	158	158	0.394682	0
Astrocytes/qNSCs	T cells	Grin2c	Crtam	1.29396	0.450056	0	3.44e-176	0.713654	0.234432	0	0	370	370	0.167304	0
Astrocytes/qNSCs	T cells	Il11ra1	Itgb2	0.401601	0.358083	0.00046675	1.11e-06	0.363053	0.411177	0	0	182	182	0.149279	0
Astrocytes/qNSCs	T cells	Itgav	Klrd1	0.366523	1.07505	0.0038575	2e-298	0.341954	0.538661	0	0	178	178	0.184197	0
Astrocytes/qNSCs	T cells	Itgav	Klrk1	0.366523	1.11257	0.0038575	1.94e-263	0.341954	0.524609	0	0	208	208	0.179392	0
Astrocytes/qNSCs	T cells	Notch1	Klrk1	0.362797	1.11257	1.06e-08	1.94e-263	0.331822	0.524609	0	0	152	152	0.174077	0
Astrocytes/qNSCs	T cells	Pdgfrb	Klrk1	0.438379	1.11257	9.26e-58	1.94e-263	0.431118	0.524609	0	0	189	189	0.226168	0
Astrocytes/qNSCs	T cells	S1pr1	Itga4	1.28501	0.946421	5.54e-178	9.04e-224	1.843	0.634668	0	0	339	339	1.16969	0
Astrocytes/qNSCs	T cells	S1pr1	Itgal	1.28501	0.712307	5.54e-178	8.38e-179	1.843	0.400804	0	0	284	284	0.738682	0
Astrocytes/qNSCs	T cells	S1pr1	Itgb1	1.28501	0.212652	5.54e-178	0.683684	1.843	0.556815	0	0	203	203	1.02621	0
Astrocytes/qNSCs	T cells	S1pr1	Itgb2	1.28501	0.358083	5.54e-178	1.11e-06	1.843	0.411177	0	0	160	160	0.757798	0
Astrocytes/qNSCs	T cells	S1pr1	Itgb7	1.28501	0.615201	5.54e-178	2.59e-190	1.843	0.345574	0	0	179	179	0.636892	0
Astrocytes/qNSCs	T cells	Itgav	Itga4	0.366523	0.946421	0.0038575	9.04e-224	0.341954	0.634668	0	720	329	804	0.217027	0
Astrocytes/qNSCs	T cells	Itgav	Itgal	0.366523	0.712307	0.0038575	8.38e-179	0.341954	0.400804	0	900	232	919	0.137056	0
Astrocytes/qNSCs	T cells	Cd27	B2m	0.869342	0.464139	4.46e-56	1.59e-27	0.572285	3.55004	0	0	241	241	2.03163	0
Astrocytes/qNSCs	T cells	Fgfr1	B2m	0.644752	0.464139	3.48e-78	1.59e-27	0.387749	3.55004	0	0	180	180	1.37652	0
Astrocytes/qNSCs	T cells	Itgav	B2m	0.366523	0.464139	0.0038575	1.59e-27	0.341954	3.55004	0	0	196	196	1.21395	0
Astrocytes/qNSCs	T cells	Notch1	B2m	0.362797	0.464139	1.06e-08	1.59e-27	0.331822	3.55004	0	0	236	236	1.17798	0
Astrocytes/qNSCs	T cells	Notch2	B2m	0.797728	0.464139	5.15e-24	1.59e-27	0.564416	3.55004	0	0	188	188	2.0037	0
Astrocytes/qNSCs	T cells	Pdgfrb	B2m	0.438379	0.464139	9.26e-58	1.59e-27	0.431118	3.55004	0	0	195	195	1.53048	0
Astrocytes/qNSCs	T cells	Tlr3	B2m	0.504134	0.464139	4.2e-31	1.59e-27	0.264641	3.55004	0	0	279	279	0.939484	0
Astrocytes/qNSCs	T cells	Cd27	Cd247	0.869342	0.776987	4.46e-56	0	0.572285	0.439521	0	0	517	517	0.251531	0
Astrocytes/qNSCs	T cells	Csf2ra	Cd247	0.302317	0.776987	1	0	0.318166	0.439521	0	0	191	191	0.139841	0
Astrocytes/qNSCs	T cells	Mertk	Cd247	0.736042	0.776987	3.84e-36	0	0.593889	0.439521	0	0	173	173	0.261027	0
Astrocytes/qNSCs	T cells	Ntrk2	Cd247	2.31177	0.776987	0	0	1.97049	0.439521	0	0	155	155	0.866072	0
Astrocytes/qNSCs	T cells	Ptprf	Cd247	0.333199	0.776987	8.23e-08	0	0.188288	0.439521	0	0	199	199	0.0827567	0
Astrocytes/qNSCs	T cells	Cd27	Cd3d	0.869342	2.18853	4.46e-56	0	0.572285	1.89805	0	0	477	477	1.08622	0
Astrocytes/qNSCs	T cells	Cd27	Cd3e	0.869342	1.79275	4.46e-56	0	0.572285	1.38202	0	0	493	493	0.79091	0
Astrocytes/qNSCs	T cells	Csf2ra	Cd3e	0.302317	1.79275	1	0	0.318166	1.38202	0	0	286	286	0.439712	0
Astrocytes/qNSCs	T cells	Itgav	Cd3e	0.366523	1.79275	0.0038575	0	0.341954	1.38202	0	0	205	205	0.472587	0
Astrocytes/qNSCs	T cells	Mertk	Cd3e	0.736042	1.79275	3.84e-36	0	0.593889	1.38202	0	0	246	246	0.820766	0
Astrocytes/qNSCs	T cells	Notch1	Cd3e	0.362797	1.79275	1.06e-08	0	0.331822	1.38202	0	0	182	182	0.458584	0
Astrocytes/qNSCs	T cells	S1pr1	Cd3e	1.28501	1.79275	5.54e-178	0	1.843	1.38202	0	0	163	163	2.54706	0
Astrocytes/qNSCs	T cells	Tlr3	Cd3e	0.504134	1.79275	4.2e-31	0	0.264641	1.38202	0	0	203	203	0.365738	0
Astrocytes/qNSCs	T cells	Cd27	Cd3g	0.869342	2.51845	4.46e-56	0	0.572285	2.27827	0	0	291	291	1.30382	0
Astrocytes/qNSCs	T cells	Cd27	Cd8a	0.869342	1.83975	4.46e-56	0	0.572285	1.41259	0	0	303	303	0.808406	0
Astrocytes/qNSCs	T cells	Tlr3	Cd8a	0.504134	1.83975	4.2e-31	0	0.264641	1.41259	0	0	179	179	0.373829	0
Astrocytes/qNSCs	T cells	Cd27	Cd8b1	0.869342	2.04039	4.46e-56	0	0.572285	1.57708	0	0	372	372	0.902538	0
Astrocytes/qNSCs	T cells	S1pr1	Cd8b1	1.28501	2.04039	5.54e-178	0	1.843	1.57708	0	0	164	164	2.90655	0
Astrocytes/qNSCs	T cells	Cd27	Itga4	0.869342	0.946421	4.46e-56	9.04e-224	0.572285	0.634668	0	0	550	550	0.363211	0
Astrocytes/qNSCs	T cells	Lrp1	Itga4	0.434027	0.946421	4.65e-08	9.04e-224	0.440114	0.634668	0	0	223	223	0.279326	0
Astrocytes/qNSCs	T cells	Notch1	Itga4	0.362797	0.946421	1.06e-08	9.04e-224	0.331822	0.634668	0	0	232	232	0.210596	0
Astrocytes/qNSCs	T cells	Notch2	Itga4	0.797728	0.946421	5.15e-24	9.04e-224	0.564416	0.634668	0	0	162	162	0.358216	0
Astrocytes/qNSCs	T cells	Pdgfrb	Itga4	0.438379	0.946421	9.26e-58	9.04e-224	0.431118	0.634668	0	0	335	335	0.273616	0
Astrocytes/qNSCs	T cells	Plxnb1	Itga4	0.582144	0.946421	5.41e-43	9.04e-224	0.341164	0.634668	0	0	159	159	0.216526	0
Astrocytes/qNSCs	T cells	Tlr3	Itga4	0.504134	0.946421	4.2e-31	9.04e-224	0.264641	0.634668	0	0	200	200	0.167959	0
Astrocytes/qNSCs	T cells	Cd27	Itgal	0.869342	0.712307	4.46e-56	8.38e-179	0.572285	0.400804	0	0	603	603	0.229374	0
Astrocytes/qNSCs	T cells	Lrp1	Itgal	0.434027	0.712307	4.65e-08	8.38e-179	0.440114	0.400804	0	0	208	208	0.1764	0
Astrocytes/qNSCs	T cells	Mertk	Itgal	0.736042	0.712307	3.84e-36	8.38e-179	0.593889	0.400804	0	0	151	151	0.238033	0
Astrocytes/qNSCs	T cells	Notch1	Itgal	0.362797	0.712307	1.06e-08	8.38e-179	0.331822	0.400804	0	0	151	151	0.132996	0
Astrocytes/qNSCs	T cells	Notch2	Itgal	0.797728	0.712307	5.15e-24	8.38e-179	0.564416	0.400804	0	0	176	176	0.22622	0
Astrocytes/qNSCs	T cells	Tlr3	Itgal	0.504134	0.712307	4.2e-31	8.38e-179	0.264641	0.400804	0	0	217	217	0.106069	0
Astrocytes/qNSCs	T cells	Cd27	Itgb1	0.869342	0.212652	4.46e-56	0.683684	0.572285	0.556815	0	0	285	285	0.318657	0
Astrocytes/qNSCs	T cells	Fzd2	Itgb1	0.939406	0.212652	2.7e-235	0.683684	0.494489	0.556815	0	0	183	183	0.275339	0
Astrocytes/qNSCs	T cells	Lgr4	Itgb1	0.736335	0.212652	3.35e-83	0.683684	0.390233	0.556815	0	0	250	250	0.217288	0
Astrocytes/qNSCs	T cells	Lrp1	Itgb1	0.434027	0.212652	4.65e-08	0.683684	0.440114	0.556815	0	0	503	503	0.245062	0
Astrocytes/qNSCs	T cells	Nisch	Itgb1	0.24013	0.212652	1	0.683684	0.746185	0.556815	0	0	238	238	0.415487	0
Astrocytes/qNSCs	T cells	Notch1	Itgb1	0.362797	0.212652	1.06e-08	0.683684	0.331822	0.556815	0	0	399	399	0.184763	0
Astrocytes/qNSCs	T cells	Notch2	Itgb1	0.797728	0.212652	5.15e-24	0.683684	0.564416	0.556815	0	0	292	292	0.314275	0
Astrocytes/qNSCs	T cells	Paqr7	Itgb1	0.328478	0.212652	0.0723841	0.683684	0.263818	0.556815	0	0	202	202	0.146898	0
Astrocytes/qNSCs	T cells	Paqr8	Itgb1	0.771154	0.212652	3.53e-78	0.683684	0.421831	0.556815	0	0	202	202	0.234882	0
Astrocytes/qNSCs	T cells	Pdgfrb	Itgb1	0.438379	0.212652	9.26e-58	0.683684	0.431118	0.556815	0	0	596	596	0.240053	0
Astrocytes/qNSCs	T cells	Plxnb1	Itgb1	0.582144	0.212652	5.41e-43	0.683684	0.341164	0.556815	0	0	175	175	0.189965	0
Astrocytes/qNSCs	T cells	Ptprf	Itgb1	0.333199	0.212652	8.23e-08	0.683684	0.188288	0.556815	0	0	225	225	0.104842	0
Astrocytes/qNSCs	T cells	Ptprs	Itgb1	0.427621	0.212652	2.81e-22	0.683684	0.307478	0.556815	0	0	220	220	0.171208	0
Astrocytes/qNSCs	T cells	Slc22a17	Itgb1	0.826372	0.212652	7.95e-58	0.683684	0.820584	0.556815	0	0	270	270	0.456913	0
Astrocytes/qNSCs	T cells	Smo	Itgb1	0.370178	0.212652	1.21e-15	0.683684	0.211973	0.556815	0	0	348	348	0.11803	0
Astrocytes/qNSCs	T cells	Tlr3	Itgb1	0.504134	0.212652	4.2e-31	0.683684	0.264641	0.556815	0	0	206	206	0.147356	0
Astrocytes/qNSCs	T cells	Cd27	Itgb2	0.869342	0.358083	4.46e-56	1.11e-06	0.572285	0.411177	0	0	276	276	0.23531	0
Astrocytes/qNSCs	T cells	Lgr4	Itgb2	0.736335	0.358083	3.35e-83	1.11e-06	0.390233	0.411177	0	0	221	221	0.160455	0
Astrocytes/qNSCs	T cells	Notch2	Itgb2	0.797728	0.358083	5.15e-24	1.11e-06	0.564416	0.411177	0	0	169	169	0.232075	0
Astrocytes/qNSCs	T cells	Paqr7	Itgb2	0.328478	0.358083	0.0723841	1.11e-06	0.263818	0.411177	0	0	183	183	0.108476	0
Astrocytes/qNSCs	T cells	Paqr8	Itgb2	0.771154	0.358083	3.53e-78	1.11e-06	0.421831	0.411177	0	0	173	173	0.173447	0
Astrocytes/qNSCs	T cells	Pdgfrb	Itgb2	0.438379	0.358083	9.26e-58	1.11e-06	0.431118	0.411177	0	0	279	279	0.177266	0
Astrocytes/qNSCs	T cells	Plxnb1	Itgb2	0.582144	0.358083	5.41e-43	1.11e-06	0.341164	0.411177	0	0	152	152	0.140279	0
Astrocytes/qNSCs	T cells	Ptprf	Itgb2	0.333199	0.358083	8.23e-08	1.11e-06	0.188288	0.411177	0	0	195	195	0.0774198	0
Astrocytes/qNSCs	T cells	Ptprs	Itgb2	0.427621	0.358083	2.81e-22	1.11e-06	0.307478	0.411177	0	0	195	195	0.126428	0
Astrocytes/qNSCs	T cells	Tlr3	Itgb2	0.504134	0.358083	4.2e-31	1.11e-06	0.264641	0.411177	0	0	212	212	0.108814	0
Astrocytes/qNSCs	T cells	Cd27	Itgb7	0.869342	0.615201	4.46e-56	2.59e-190	0.572285	0.345574	0	0	256	256	0.197767	0
Astrocytes/qNSCs	T cells	Mertk	Itgb7	0.736042	0.615201	3.84e-36	2.59e-190	0.593889	0.345574	0	0	183	183	0.205232	0
Astrocytes/qNSCs	T cells	Nisch	Itgb7	0.24013	0.615201	1	2.59e-190	0.746185	0.345574	0	0	289	289	0.257862	0
Astrocytes/qNSCs	T cells	Pdgfrb	Itgb7	0.438379	0.615201	9.26e-58	2.59e-190	0.431118	0.345574	0	0	167	167	0.148983	0
Astrocytes/qNSCs	T cells	Plxnb1	Itgb7	0.582144	0.615201	5.41e-43	2.59e-190	0.341164	0.345574	0	0	152	152	0.117897	0
Astrocytes/qNSCs	T cells	Ptprf	Itgb7	0.333199	0.615201	8.23e-08	2.59e-190	0.188288	0.345574	0	0	213	213	0.0650675	0
Astrocytes/qNSCs	T cells	Ptprs	Itgb7	0.427621	0.615201	2.81e-22	2.59e-190	0.307478	0.345574	0	0	181	181	0.106257	0
Astrocytes/qNSCs	T cells	Cd27	Klrd1	0.869342	1.07505	4.46e-56	2e-298	0.572285	0.538661	0	0	608	608	0.308268	0
Astrocytes/qNSCs	T cells	Lrp1	Klrd1	0.434027	1.07505	4.65e-08	2e-298	0.440114	0.538661	0	0	234	234	0.237072	0
Astrocytes/qNSCs	T cells	Tlr3	Klrd1	0.504134	1.07505	4.2e-31	2e-298	0.264641	0.538661	0	0	247	247	0.142552	0
Astrocytes/qNSCs	T cells	Tlr3	Klrk1	0.504134	1.11257	4.2e-31	1.94e-263	0.264641	0.524609	0	0	455	455	0.138833	0
Endothelial cells	T cells	Itga6	Itgb1	0.893433	0.212652	7.02e-109	0.683684	0.598962	0.556815	538	900	926	996	0.333511	0
Endothelial cells	T cells	Itga6	Itgal	0.893433	0.712307	7.02e-109	8.38e-179	0.598962	0.400804	0	720	209	769	0.240067	0
Endothelial cells	T cells	Itga6	Itgb2	0.893433	0.358083	7.02e-109	1.11e-06	0.598962	0.411177	0	720	688	909	0.246279	0
Endothelial cells	T cells	Itga6	Itgb7	0.893433	0.615201	7.02e-109	2.59e-190	0.598962	0.345574	0	800	566	909	0.206986	0
Endothelial cells	T cells	Itgb1	Itgb2	0.419864	0.358083	2.7e-25	1.11e-06	0.589223	0.411177	0	800	98	812	0.242275	0
Endothelial cells	T cells	Itgb1	Itgb7	0.419864	0.615201	2.7e-25	2.59e-190	0.589223	0.345574	0	720	92	735	0.20362	0
Endothelial cells	T cells	Acvrl1	B2m	1.80567	0.464139	0	1.59e-27	1.3855	3.55004	0	0	173	173	4.91857	0
Endothelial cells	T cells	Acvrl1	Cd247	1.80567	0.776987	0	0	1.3855	0.439521	0	0	172	172	0.608955	0
Endothelial cells	T cells	Acvrl1	Cd3d	1.80567	2.18853	0	0	1.3855	1.89805	0	0	150	150	2.62974	0
Endothelial cells	T cells	Acvrl1	Cd3e	1.80567	1.79275	0	0	1.3855	1.38202	0	0	158	158	1.91478	0
Endothelial cells	T cells	Acvrl1	Cd3g	1.80567	2.51845	0	0	1.3855	2.27827	0	0	208	208	3.15654	0
Endothelial cells	T cells	Acvrl1	Itgb2	1.80567	0.358083	0	1.11e-06	1.3855	0.411177	0	0	183	183	0.569684	0
Endothelial cells	T cells	Acvrl1	Itgb7	1.80567	0.615201	0	2.59e-190	1.3855	0.345574	0	0	160	160	0.478792	0
Endothelial cells	T cells	Bmpr2	Cd247	0.776352	0.776987	2.29e-87	0	0.56426	0.439521	0	0	155	155	0.248004	0
Endothelial cells	T cells	Bmpr2	Itga4	0.776352	0.946421	2.29e-87	9.04e-224	0.56426	0.634668	0	0	200	200	0.358118	0
Endothelial cells	T cells	Bmpr2	Itgb1	0.776352	0.212652	2.29e-87	0.683684	0.56426	0.556815	0	0	279	279	0.314188	0
Endothelial cells	T cells	Bmpr2	Itgb2	0.776352	0.358083	2.29e-87	1.11e-06	0.56426	0.411177	0	0	241	241	0.232011	0
Endothelial cells	T cells	Ceacam1	Cd160	0.6602	0.558399	5.58e-126	3.65e-208	0.355726	0.27683	0	0	169	169	0.0984757	0
Endothelial cells	T cells	Ceacam1	Crtam	0.6602	0.450056	5.58e-126	3.44e-176	0.355726	0.234432	0	0	161	161	0.0833936	0
Endothelial cells	T cells	Ceacam1	Klrk1	0.6602	1.11257	5.58e-126	1.94e-263	0.355726	0.524609	0	0	612	613	0.186617	0
Endothelial cells	T cells	Ephb4	Itgb1	0.483488	0.212652	7.81e-105	0.683684	0.233625	0.556815	0	0	219	219	0.130086	0
Endothelial cells	T cells	Fas	Cd160	1.27463	0.558399	0	3.65e-208	0.847238	0.27683	0	0	179	179	0.234541	0
Endothelial cells	T cells	Fas	Itga4	1.27463	0.946421	0	9.04e-224	0.847238	0.634668	0	0	596	596	0.537714	0
Endothelial cells	T cells	Fas	Itgal	1.27463	0.712307	0	8.38e-179	0.847238	0.400804	0	0	535	535	0.339577	0
Endothelial cells	T cells	Fas	Itgb1	1.27463	0.212652	0	0.683684	0.847238	0.556815	0	0	272	272	0.471754	0
Endothelial cells	T cells	Fas	Itgb2	1.27463	0.358083	0	1.11e-06	0.847238	0.411177	0	0	276	276	0.348365	0
Endothelial cells	T cells	Fas	Klrd1	1.27463	1.07505	0	2e-298	0.847238	0.538661	0	0	276	276	0.456374	0
Endothelial cells	T cells	Fas	Klrk1	1.27463	1.11257	0	1.94e-263	0.847238	0.524609	0	0	486	486	0.444469	0
Endothelial cells	T cells	Flt1	Itga4	2.70835	0.946421	0	9.04e-224	2.59462	0.634668	0	0	244	244	1.64672	0
Endothelial cells	T cells	Flt1	Itgb1	2.70835	0.212652	0	0.683684	2.59462	0.556815	0	0	403	403	1.44473	0
Endothelial cells	T cells	Flt1	Itgb2	2.70835	0.358083	0	1.11e-06	2.59462	0.411177	0	0	216	216	1.06685	0
Endothelial cells	T cells	Flt1	Itgb7	2.70835	0.615201	0	2.59e-190	2.59462	0.345574	0	0	180	180	0.896635	0
Endothelial cells	T cells	Flt1	Klrd1	2.70835	1.07505	0	2e-298	2.59462	0.538661	0	0	175	175	1.39762	0
Endothelial cells	T cells	Flt1	Klrk1	2.70835	1.11257	0	1.94e-263	2.59462	0.524609	0	0	171	171	1.36116	0
Endothelial cells	T cells	Fzd4	Itgb1	0.668567	0.212652	5.4e-123	0.683684	0.335707	0.556815	0	0	222	222	0.186926	0
Endothelial cells	T cells	Hyal2	Itgb1	0.666609	0.212652	6.86e-109	0.683684	0.384616	0.556815	0	0	232	232	0.21416	0
Endothelial cells	T cells	Ifnar1	Itgal	0.782161	0.712307	5.67e-79	8.38e-179	0.645072	0.400804	0	0	151	151	0.258548	0
Endothelial cells	T cells	Ifnar1	Klrk1	0.782161	1.11257	5.67e-79	1.94e-263	0.645072	0.524609	0	0	245	245	0.338411	0
Endothelial cells	T cells	Ifnar2	Itgb2	0.592378	0.358083	4.93e-44	1.11e-06	0.774438	0.411177	0	0	163	163	0.318431	0
Endothelial cells	T cells	Igf1r	Itgb1	1.23966	0.212652	6.17e-257	0.683684	1.02956	0.556815	0	0	356	356	0.573276	0
Endothelial cells	T cells	Il10rb	Itgb2	0.77081	0.358083	5.93e-89	1.11e-06	0.829249	0.411177	0	0	289	289	0.340968	0
Endothelial cells	T cells	Insr	Itgb1	0.324353	0.212652	4.61e-14	0.683684	0.220202	0.556815	0	0	265	265	0.122612	0
Endothelial cells	T cells	Kdr	Klrd1	0.84447	1.07505	1e-113	2e-298	0.491915	0.538661	0	0	160	160	0.264975	0
Endothelial cells	T cells	Kdr	Klrk1	0.84447	1.11257	1e-113	1.94e-263	0.491915	0.524609	0	0	231	231	0.258063	0
Endothelial cells	T cells	Lpar6	Clec2i	0.583461	0.603355	5.48e-34	2.92e-203	0.513773	0.344838	0	0	153	153	0.177168	0
Endothelial cells	T cells	Notch1	Klrk1	0.396863	1.11257	2.89e-27	1.94e-263	0.309303	0.524609	0	0	152	152	0.162263	0
Endothelial cells	T cells	Ptprm	Klrk1	0.442325	1.11257	1.34e-50	1.94e-263	0.229662	0.524609	0	0	168	168	0.120483	0
Endothelial cells	T cells	S1pr1	Itga4	1.19555	0.946421	0	9.04e-224	1.4711	0.634668	0	0	339	339	0.933657	0
Endothelial cells	T cells	S1pr1	Itgal	1.19555	0.712307	0	8.38e-179	1.4711	0.400804	0	0	284	284	0.589622	0
Endothelial cells	T cells	S1pr1	Itgb1	1.19555	0.212652	0	0.683684	1.4711	0.556815	0	0	203	203	0.819128	0
Endothelial cells	T cells	S1pr1	Itgb2	1.19555	0.358083	0	1.11e-06	1.4711	0.411177	0	0	160	160	0.604881	0
Endothelial cells	T cells	S1pr1	Itgb7	1.19555	0.615201	0	2.59e-190	1.4711	0.345574	0	0	179	179	0.508373	0
Endothelial cells	T cells	Tek	Klrk1	1.10254	1.11257	0	1.94e-263	0.635364	0.524609	0	0	161	161	0.333318	0
Endothelial cells	T cells	Tfrc	Klrk1	0.452668	1.11257	6.02e-41	1.94e-263	0.241436	0.524609	0	0	268	268	0.126659	0
Endothelial cells	T cells	Thbd	Crtam	1.00742	0.450056	2.27e-257	3.44e-176	0.559388	0.234432	0	0	527	527	0.131139	0
Endothelial cells	T cells	Tnfrsf1a	Cd160	0.298951	0.558399	1.04e-07	3.65e-208	0.387393	0.27683	0	0	470	470	0.107242	0
Endothelial cells	T cells	Tnfrsf1a	Klrk1	0.298951	1.11257	1.04e-07	1.94e-263	0.387393	0.524609	0	0	252	252	0.20323	0
Endothelial cells	T cells	Tfrc	B2m	0.452668	0.464139	6.02e-41	1.59e-27	0.241436	3.55004	0	720	890	967	0.857106	0
Endothelial cells	T cells	Fzd4	Cd3d	0.668567	2.18853	5.4e-123	0	0.335707	1.89805	0	900	0	900	0.637187	0
Endothelial cells	T cells	Tfrc	Cd3d	0.452668	2.18853	6.02e-41	0	0.241436	1.89805	0	900	105	906	0.458256	0
Endothelial cells	T cells	Fzd4	Cd3g	0.668567	2.51845	5.4e-123	0	0.335707	2.27827	0	900	0	900	0.764831	0
Endothelial cells	T cells	Tfrc	Cd3g	0.452668	2.51845	6.02e-41	0	0.241436	2.27827	0	900	0	900	0.550056	0
Endothelial cells	T cells	Itga1	Itga4	0.375243	0.946421	6.38e-48	9.04e-224	0.191544	0.634668	0	720	297	794	0.121566	0
Endothelial cells	T cells	Itga6	Itga4	0.893433	0.946421	7.02e-109	9.04e-224	0.598962	0.634668	0	720	250	781	0.380142	0
Endothelial cells	T cells	Itgb1	Itga4	0.419864	0.946421	2.7e-25	9.04e-224	0.589223	0.634668	0	900	906	990	0.373961	0
Endothelial cells	T cells	Cd93	Itgal	0.881203	0.712307	2.78e-203	8.38e-179	0.449773	0.400804	0	900	343	931	0.180271	0
Endothelial cells	T cells	Ceacam1	Itgal	0.6602	0.712307	5.58e-126	8.38e-179	0.355726	0.400804	0	900	127	909	0.142576	0
Endothelial cells	T cells	Itga1	Itgal	0.375243	0.712307	6.38e-48	8.38e-179	0.191544	0.400804	0	720	175	759	0.0767715	0
Endothelial cells	T cells	Itgb1	Itgal	0.419864	0.712307	2.7e-25	8.38e-179	0.589223	0.400804	0	800	793	956	0.236163	0
Endothelial cells	T cells	Plaur	Itgal	0.456996	0.712307	1.07e-15	8.38e-179	0.224165	0.400804	0	900	201	916	0.0898462	0
Endothelial cells	T cells	Ceacam1	Itgb1	0.6602	0.212652	5.58e-126	0.683684	0.355726	0.556815	0	900	136	910	0.198073	0
Endothelial cells	T cells	Itga1	Itgb1	0.375243	0.212652	6.38e-48	0.683684	0.191544	0.556815	0	900	800	979	0.106654	0
Endothelial cells	T cells	Cd93	Itgb2	0.881203	0.358083	2.78e-203	1.11e-06	0.449773	0.411177	0	900	220	918	0.184936	0
Endothelial cells	T cells	Ceacam1	Itgb2	0.6602	0.358083	5.58e-126	1.11e-06	0.355726	0.411177	0	900	138	910	0.146266	0
Endothelial cells	T cells	Itga1	Itgb2	0.375243	0.358083	6.38e-48	1.11e-06	0.191544	0.411177	0	720	571	874	0.0787583	0
Endothelial cells	T cells	Plaur	Itgb2	0.456996	0.358083	1.07e-15	1.11e-06	0.224165	0.411177	0	900	299	926	0.0921713	0
Endothelial cells	T cells	Itga1	Itgb7	0.375243	0.615201	6.38e-48	2.59e-190	0.191544	0.345574	0	800	541	904	0.0661925	0
Endothelial cells	T cells	Ceacam1	B2m	0.6602	0.464139	5.58e-126	1.59e-27	0.355726	3.55004	0	0	160	160	1.26284	0
Endothelial cells	T cells	Clec2d	B2m	1.17592	0.464139	5.35e-257	1.59e-27	0.777604	3.55004	0	0	170	170	2.76052	0
Endothelial cells	T cells	Fas	B2m	1.27463	0.464139	0	1.59e-27	0.847238	3.55004	0	0	303	303	3.00773	0
Endothelial cells	T cells	Fcgrt	B2m	1.20754	0.464139	3.36e-252	1.59e-27	0.998195	3.55004	0	0	920	920	3.54363	0
Endothelial cells	T cells	Flt1	B2m	2.70835	0.464139	0	1.59e-27	2.59462	3.55004	0	0	205	205	9.21101	0
Endothelial cells	T cells	Ifnar1	B2m	0.782161	0.464139	5.67e-79	1.59e-27	0.645072	3.55004	0	0	171	171	2.29003	0
Endothelial cells	T cells	Igf1r	B2m	1.23966	0.464139	6.17e-257	1.59e-27	1.02956	3.55004	0	0	179	179	3.65499	0
Endothelial cells	T cells	Il10rb	B2m	0.77081	0.464139	5.93e-89	1.59e-27	0.829249	3.55004	0	0	218	218	2.94387	0
Endothelial cells	T cells	Itga6	B2m	0.893433	0.464139	7.02e-109	1.59e-27	0.598962	3.55004	0	0	171	171	2.12634	0
Endothelial cells	T cells	Itgb1	B2m	0.419864	0.464139	2.7e-25	1.59e-27	0.589223	3.55004	0	0	252	252	2.09176	0
Endothelial cells	T cells	Kdr	B2m	0.84447	0.464139	1e-113	1.59e-27	0.491915	3.55004	0	0	219	219	1.74631	0
Endothelial cells	T cells	Notch1	B2m	0.396863	0.464139	2.89e-27	1.59e-27	0.309303	3.55004	0	0	236	236	1.09804	0
Endothelial cells	T cells	Plaur	B2m	0.456996	0.464139	1.07e-15	1.59e-27	0.224165	3.55004	0	0	164	164	0.795793	0
Endothelial cells	T cells	Tek	B2m	1.10254	0.464139	0	1.59e-27	0.635364	3.55004	0	0	184	184	2.25557	0
Endothelial cells	T cells	Tgfbr2	B2m	0.511688	0.464139	6.28e-37	1.59e-27	0.458336	3.55004	0	0	222	222	1.62711	0
Endothelial cells	T cells	Thbd	B2m	1.00742	0.464139	2.27e-257	1.59e-27	0.559388	3.55004	0	0	161	161	1.98585	0
Endothelial cells	T cells	Tnfrsf1a	B2m	0.298951	0.464139	1.04e-07	1.59e-27	0.387393	3.55004	0	0	297	297	1.37526	0
Endothelial cells	T cells	Itga1	Cd160	0.375243	0.558399	6.38e-48	3.65e-208	0.191544	0.27683	0	0	396	396	0.0530251	0
Endothelial cells	T cells	Ephb4	Cd247	0.483488	0.776987	7.81e-105	0	0.233625	0.439521	0	0	178	178	0.102683	0
Endothelial cells	T cells	Fas	Cd247	1.27463	0.776987	0	0	0.847238	0.439521	0	0	238	238	0.372379	0
Endothelial cells	T cells	Igf1r	Cd247	1.23966	0.776987	6.17e-257	0	1.02956	0.439521	0	0	174	174	0.452515	0
Endothelial cells	T cells	Insr	Cd247	0.324353	0.776987	4.61e-14	0	0.220202	0.439521	0	0	177	177	0.0967835	0
Endothelial cells	T cells	Itgb1	Cd247	0.419864	0.776987	2.7e-25	0	0.589223	0.439521	0	0	173	173	0.258976	0
Endothelial cells	T cells	Scarb1	Cd247	0.645551	0.776987	2.29e-65	0	0.448451	0.439521	0	0	165	165	0.197104	0
Endothelial cells	T cells	Tfrc	Cd247	0.452668	0.776987	6.02e-41	0	0.241436	0.439521	0	0	261	261	0.106116	0
Endothelial cells	T cells	Tgfbr2	Cd247	0.511688	0.776987	6.28e-37	0	0.458336	0.439521	0	0	185	185	0.201448	0
Endothelial cells	T cells	Tnfrsf1a	Cd247	0.298951	0.776987	1.04e-07	0	0.387393	0.439521	0	0	175	175	0.170267	0
Endothelial cells	T cells	Ifnar1	Cd3d	0.782161	2.18853	5.67e-79	0	0.645072	1.89805	0	0	209	209	1.22438	0
Endothelial cells	T cells	Cd93	Cd3e	0.881203	1.79275	2.78e-203	0	0.449773	1.38202	0	0	410	410	0.621595	0
Endothelial cells	T cells	Fas	Cd3e	1.27463	1.79275	0	0	0.847238	1.38202	0	0	404	404	1.1709	0
Endothelial cells	T cells	Itgb1	Cd3e	0.419864	1.79275	2.7e-25	0	0.589223	1.38202	0	0	194	194	0.814318	0
Endothelial cells	T cells	Kdr	Cd3e	0.84447	1.79275	1e-113	0	0.491915	1.38202	0	0	168	168	0.679836	0
Endothelial cells	T cells	Notch1	Cd3e	0.396863	1.79275	2.89e-27	0	0.309303	1.38202	0	0	182	182	0.427463	0
Endothelial cells	T cells	Nrp1	Cd3e	0.660911	1.79275	3.99e-51	0	0.511061	1.38202	0	0	150	150	0.706296	0
Endothelial cells	T cells	S1pr1	Cd3e	1.19555	1.79275	0	0	1.4711	1.38202	0	0	163	163	2.03308	0
Endothelial cells	T cells	Tfrc	Cd3e	0.452668	1.79275	6.02e-41	0	0.241436	1.38202	0	0	384	384	0.333669	0
Endothelial cells	T cells	Tnfrsf1a	Cd3e	0.298951	1.79275	1.04e-07	0	0.387393	1.38202	0	0	160	160	0.535384	0
Endothelial cells	T cells	Fas	Cd8a	1.27463	1.83975	0	0	0.847238	1.41259	0	0	515	515	1.1968	0
Endothelial cells	T cells	Thbd	Cd8a	1.00742	1.83975	2.27e-257	0	0.559388	1.41259	0	0	151	151	0.790187	0
Endothelial cells	T cells	Tnfrsf1a	Cd8a	0.298951	1.83975	1.04e-07	0	0.387393	1.41259	0	0	195	195	0.547228	0
Endothelial cells	T cells	Fas	Cd8b1	1.27463	2.04039	0	0	0.847238	1.57708	0	0	241	241	1.33616	0
Endothelial cells	T cells	S1pr1	Cd8b1	1.19555	2.04039	0	0	1.4711	1.57708	0	0	164	164	2.32003	0
Endothelial cells	T cells	Adgre5	Itga4	0.58	0.946421	4.63e-76	9.04e-224	0.355477	0.634668	0	0	218	218	0.225609	0
Endothelial cells	T cells	Bcam	Itga4	1.22018	0.946421	0	9.04e-224	1.01574	0.634668	0	0	253	253	0.644655	0
Endothelial cells	T cells	Cd93	Itga4	0.881203	0.946421	2.78e-203	9.04e-224	0.449773	0.634668	0	0	247	247	0.285456	0
Endothelial cells	T cells	Kdr	Itga4	0.84447	0.946421	1e-113	9.04e-224	0.491915	0.634668	0	0	298	298	0.312202	0
Endothelial cells	T cells	Notch1	Itga4	0.396863	0.946421	2.89e-27	9.04e-224	0.309303	0.634668	0	0	232	232	0.196305	0
Endothelial cells	T cells	Nrp1	Itga4	0.660911	0.946421	3.99e-51	9.04e-224	0.511061	0.634668	0	0	285	285	0.324354	0
Endothelial cells	T cells	Plaur	Itga4	0.456996	0.946421	1.07e-15	9.04e-224	0.224165	0.634668	0	0	192	192	0.14227	0
Endothelial cells	T cells	Tek	Itga4	1.10254	0.946421	0	9.04e-224	0.635364	0.634668	0	0	209	209	0.403245	0
Endothelial cells	T cells	Tfrc	Itga4	0.452668	0.946421	6.02e-41	9.04e-224	0.241436	0.634668	0	0	379	379	0.153231	0
Endothelial cells	T cells	Tgfbr2	Itga4	0.511688	0.946421	6.28e-37	9.04e-224	0.458336	0.634668	0	0	213	213	0.290891	0
Endothelial cells	T cells	Tnfrsf1a	Itga4	0.298951	0.946421	1.04e-07	9.04e-224	0.387393	0.634668	0	0	182	182	0.245866	0
Endothelial cells	T cells	Adgre5	Itgal	0.58	0.712307	4.63e-76	8.38e-179	0.355477	0.400804	0	0	267	267	0.142476	0
Endothelial cells	T cells	Notch1	Itgal	0.396863	0.712307	2.89e-27	8.38e-179	0.309303	0.400804	0	0	151	151	0.12397	0
Endothelial cells	T cells	Nrp1	Itgal	0.660911	0.712307	3.99e-51	8.38e-179	0.511061	0.400804	0	0	215	215	0.204835	0
Endothelial cells	T cells	Tfrc	Itgal	0.452668	0.712307	6.02e-41	8.38e-179	0.241436	0.400804	0	0	383	383	0.0967685	0
Endothelial cells	T cells	Tnfrsf1a	Itgal	0.298951	0.712307	1.04e-07	8.38e-179	0.387393	0.400804	0	0	233	233	0.155269	0
Endothelial cells	T cells	Adgre5	Itgb1	0.58	0.212652	4.63e-76	0.683684	0.355477	0.556815	0	0	235	235	0.197935	0
Endothelial cells	T cells	Bcam	Itgb1	1.22018	0.212652	0	0.683684	1.01574	0.556815	0	0	245	245	0.565577	0
Endothelial cells	T cells	Cd93	Itgb1	0.881203	0.212652	2.78e-203	0.683684	0.449773	0.556815	0	0	197	197	0.25044	0
Endothelial cells	T cells	Kdr	Itgb1	0.84447	0.212652	1e-113	0.683684	0.491915	0.556815	0	0	626	626	0.273905	0
Endothelial cells	T cells	Lrp6	Itgb1	0.237095	0.212652	0.00377758	0.683684	0.201119	0.556815	0	0	153	153	0.111986	0
Endothelial cells	T cells	Notch1	Itgb1	0.396863	0.212652	2.89e-27	0.683684	0.309303	0.556815	0	0	399	399	0.172225	0
Endothelial cells	T cells	Notch4	Itgb1	0.327196	0.212652	5.41e-40	0.683684	0.17106	0.556815	0	0	192	192	0.0952485	0
Endothelial cells	T cells	Nrp1	Itgb1	0.660911	0.212652	3.99e-51	0.683684	0.511061	0.556815	0	0	341	341	0.284566	0
Endothelial cells	T cells	Paqr7	Itgb1	0.352327	0.212652	5.58e-16	0.683684	0.260245	0.556815	0	0	202	202	0.144908	0
Endothelial cells	T cells	Plaur	Itgb1	0.456996	0.212652	1.07e-15	0.683684	0.224165	0.556815	0	0	498	498	0.124818	0
Endothelial cells	T cells	Scarb1	Itgb1	0.645551	0.212652	2.29e-65	0.683684	0.448451	0.556815	0	0	179	179	0.249704	0
Endothelial cells	T cells	Tek	Itgb1	1.10254	0.212652	0	0.683684	0.635364	0.556815	0	0	499	499	0.35378	0
Endothelial cells	T cells	Tfrc	Itgb1	0.452668	0.212652	6.02e-41	0.683684	0.241436	0.556815	0	0	600	600	0.134435	0
Endothelial cells	T cells	Tgfbr2	Itgb1	0.511688	0.212652	6.28e-37	0.683684	0.458336	0.556815	0	0	308	308	0.255208	0
Endothelial cells	T cells	Thbd	Itgb1	1.00742	0.212652	2.27e-257	0.683684	0.559388	0.556815	0	0	196	196	0.311475	0
Endothelial cells	T cells	Tie1	Itgb1	0.972074	0.212652	8.94e-254	0.683684	0.52865	0.556815	0	0	277	277	0.29436	0
Endothelial cells	T cells	Tnfrsf1a	Itgb1	0.298951	0.212652	1.04e-07	0.683684	0.387393	0.556815	0	0	286	286	0.215706	0
Endothelial cells	T cells	Adgre5	Itgb2	0.58	0.358083	4.63e-76	1.11e-06	0.355477	0.411177	0	0	387	387	0.146164	0
Endothelial cells	T cells	Clec2d	Itgb2	1.17592	0.358083	5.35e-257	1.11e-06	0.777604	0.411177	0	0	157	157	0.319733	0
Endothelial cells	T cells	Kdr	Itgb2	0.84447	0.358083	1e-113	1.11e-06	0.491915	0.411177	0	0	292	292	0.202264	0
Endothelial cells	T cells	Paqr7	Itgb2	0.352327	0.358083	5.58e-16	1.11e-06	0.260245	0.411177	0	0	183	183	0.107007	0
Endothelial cells	T cells	Scarb1	Itgb2	0.645551	0.358083	2.29e-65	1.11e-06	0.448451	0.411177	0	0	156	156	0.184393	0
Endothelial cells	T cells	Tek	Itgb2	1.10254	0.358083	0	1.11e-06	0.635364	0.411177	0	0	210	210	0.261247	0
Endothelial cells	T cells	Tgfbr2	Itgb2	0.511688	0.358083	6.28e-37	1.11e-06	0.458336	0.411177	0	0	234	234	0.188457	0
Endothelial cells	T cells	Thbd	Itgb2	1.00742	0.358083	2.27e-257	1.11e-06	0.559388	0.411177	0	0	154	154	0.230007	0
Endothelial cells	T cells	Tie1	Itgb2	0.972074	0.358083	8.94e-254	1.11e-06	0.52865	0.411177	0	0	200	200	0.217368	0
Endothelial cells	T cells	Tnfrsf1a	Itgb2	0.298951	0.358083	1.04e-07	1.11e-06	0.387393	0.411177	0	0	227	227	0.159287	0
Endothelial cells	T cells	Adgra2	Itgb7	0.470411	0.615201	1.64e-97	2.59e-190	0.224095	0.345574	0	0	170	170	0.0774413	0
Endothelial cells	T cells	Adgre5	Itgb7	0.58	0.615201	4.63e-76	2.59e-190	0.355477	0.345574	0	0	210	210	0.122843	0
Endothelial cells	T cells	Clec2d	Itgb7	1.17592	0.615201	5.35e-257	2.59e-190	0.777604	0.345574	0	0	196	196	0.26872	0
Endothelial cells	T cells	Ptprr	Itgb7	1.19572	0.615201	0	2.59e-190	0.668259	0.345574	0	0	153	153	0.230933	0
Endothelial cells	T cells	Tfrc	Itgb7	0.452668	0.615201	6.02e-41	2.59e-190	0.241436	0.345574	0	0	175	175	0.0834339	0
Endothelial cells	T cells	Tgfbr2	Itgb7	0.511688	0.615201	6.28e-37	2.59e-190	0.458336	0.345574	0	0	181	181	0.158389	0
Endothelial cells	T cells	Cd93	Klrd1	0.881203	1.07505	2.78e-203	2e-298	0.449773	0.538661	0	0	173	173	0.242275	0
Endothelial cells	T cells	Ceacam1	Klrd1	0.6602	1.07505	5.58e-126	2e-298	0.355726	0.538661	0	0	213	213	0.191615	0
Endothelial cells	T cells	Clec2d	Klrd1	1.17592	1.07505	5.35e-257	2e-298	0.777604	0.538661	0	0	201	201	0.418865	0
Endothelial cells	T cells	Itga1	Klrd1	0.375243	1.07505	6.38e-48	2e-298	0.191544	0.538661	0	0	347	347	0.103177	0
Endothelial cells	T cells	Tfrc	Klrd1	0.452668	1.07505	6.02e-41	2e-298	0.241436	0.538661	0	0	159	159	0.130052	0
Endothelial cells	T cells	Clec2d	Klrk1	1.17592	1.11257	5.35e-257	1.94e-263	0.777604	0.524609	0	0	212	212	0.407938	0
Endothelial cells	T cells	Itga1	Klrk1	0.375243	1.11257	6.38e-48	1.94e-263	0.191544	0.524609	0	0	354	354	0.100486	0
Macrophages	T cells	Itgal	Itgb2	0.53885	0.358083	1.67e-22	1.11e-06	0.276461	0.411177	538	900	942	997	0.113674	0
Macrophages	T cells	Itgam	Itgb2	0.41296	0.358083	0.0195956	1.11e-06	0.462689	0.411177	503	900	850	991	0.190247	0
Macrophages	T cells	Adrb2	Cd3d	0.641628	2.18853	1.39e-05	0	0.722388	1.89805	0	900	58	901	1.37113	0
Macrophages	T cells	Adrb2	Cd3g	0.641628	2.51845	1.39e-05	0	0.722388	2.27827	0	900	74	903	1.6458	0
Macrophages	T cells	Fcer1g	Itgb2	1.46239	0.358083	5.68e-46	1.11e-06	3.10736	0.411177	0	900	694	968	1.27768	0
Macrophages	T cells	Fpr2	Itgal	0.620864	0.712307	4.74e-197	8.38e-179	0.30251	0.400804	0	900	223	919	0.121247	0
Macrophages	T cells	Fpr2	Itgb2	0.620864	0.358083	4.74e-197	1.11e-06	0.30251	0.411177	0	900	281	925	0.124385	0
Macrophages	T cells	Itga4	Itgal	0.557893	0.712307	3.08e-26	8.38e-179	0.375532	0.400804	0	720	399	824	0.150515	0
Macrophages	T cells	Itga4	Itgb1	0.557893	0.212652	3.08e-26	0.683684	0.375532	0.556815	0	900	906	990	0.209102	0
Macrophages	T cells	Itga4	Itgb2	0.557893	0.358083	3.08e-26	1.11e-06	0.375532	0.411177	0	720	839	953	0.15441	0
Macrophages	T cells	Itga4	Itgb7	0.557893	0.615201	3.08e-26	2.59e-190	0.375532	0.345574	0	900	908	990	0.129774	0
Macrophages	T cells	Itgal	Itgb1	0.53885	0.212652	1.67e-22	0.683684	0.276461	0.556815	0	800	793	956	0.153937	0
Macrophages	T cells	Itgal	Itgb7	0.53885	0.615201	1.67e-22	2.59e-190	0.276461	0.345574	0	720	715	917	0.0955376	0
Macrophages	T cells	Itgam	Itgb1	0.41296	0.212652	0.0195956	0.683684	0.462689	0.556815	0	800	794	957	0.257632	0
Macrophages	T cells	Itgam	Itgb7	0.41296	0.615201	0.0195956	2.59e-190	0.462689	0.345574	0	360	484	655	0.159893	0
Macrophages	T cells	Itgb2	Itgb7	0.641712	0.615201	7.56e-09	2.59e-190	0.614281	0.345574	0	720	254	782	0.212279	0
Macrophages	T cells	Adgre1	Itga4	0.368601	0.946421	1	9.04e-224	0.335329	0.634668	0	0	418	418	0.212822	0
Macrophages	T cells	Adgre1	Itgal	0.368601	0.712307	1	8.38e-179	0.335329	0.400804	0	0	522	522	0.134401	0
Macrophages	T cells	Adgre1	Itgb1	0.368601	0.212652	1	0.683684	0.335329	0.556815	0	0	364	364	0.186716	0
Macrophages	T cells	Adgre1	Itgb2	0.368601	0.358083	1	1.11e-06	0.335329	0.411177	0	0	712	712	0.137879	0
Macrophages	T cells	Adgre1	Klrd1	0.368601	1.07505	1	2e-298	0.335329	0.538661	0	0	218	218	0.180628	0
Macrophages	T cells	Adgre1	Klrk1	0.368601	1.11257	1	1.94e-263	0.335329	0.524609	0	0	421	421	0.175916	0
Macrophages	T cells	Adrb2	B2m	0.641628	0.464139	1.39e-05	1.59e-27	0.722388	3.55004	0	0	153	153	2.56451	0
Macrophages	T cells	C5ar1	Itgal	0.888628	0.712307	1.02e-15	8.38e-179	0.47318	0.400804	0	0	446	446	0.189652	0
Macrophages	T cells	C5ar1	Itgb1	0.888628	0.212652	1.02e-15	0.683684	0.47318	0.556815	0	0	157	157	0.263473	0
Macrophages	T cells	C5ar1	Itgb2	0.888628	0.358083	1.02e-15	1.11e-06	0.47318	0.411177	0	0	590	590	0.194561	0
Macrophages	T cells	Ccr1	Itga4	1.05253	0.946421	0	9.04e-224	0.534991	0.634668	0	0	336	336	0.339541	0
Macrophages	T cells	Ccr1	Itgal	1.05253	0.712307	0	8.38e-179	0.534991	0.400804	0	0	461	461	0.214427	0
Macrophages	T cells	Ccr1	Itgb1	1.05253	0.212652	0	0.683684	0.534991	0.556815	0	0	274	274	0.297891	0
Macrophages	T cells	Ccr1	Itgb2	1.05253	0.358083	0	1.11e-06	0.534991	0.411177	0	0	493	493	0.219976	0
Macrophages	T cells	Ccr1	Itgb7	1.05253	0.615201	0	2.59e-190	0.534991	0.345574	0	0	291	291	0.184879	0
Macrophages	T cells	Ccr1	Klrd1	1.05253	1.07505	0	2e-298	0.534991	0.538661	0	0	164	164	0.288179	0
Macrophages	T cells	Ccr1	Klrk1	1.05253	1.11257	0	1.94e-263	0.534991	0.524609	0	0	257	257	0.280661	0
Macrophages	T cells	Ccr2	Itga4	1.0086	0.946421	4.89e-78	9.04e-224	0.439486	0.634668	0	0	428	428	0.278928	0
Macrophages	T cells	Ccr2	Itgal	1.0086	0.712307	4.89e-78	8.38e-179	0.439486	0.400804	0	0	497	497	0.176148	0
Macrophages	T cells	Ccr2	Itgb1	1.0086	0.212652	4.89e-78	0.683684	0.439486	0.556815	0	0	300	300	0.244712	0
Macrophages	T cells	Ccr2	Itgb2	1.0086	0.358083	4.89e-78	1.11e-06	0.439486	0.411177	0	0	475	475	0.180706	0
Macrophages	T cells	Ccr2	Itgb7	1.0086	0.615201	4.89e-78	2.59e-190	0.439486	0.345574	0	0	197	197	0.151875	0
Macrophages	T cells	Ccr2	Klrd1	1.0086	1.07505	4.89e-78	2e-298	0.439486	0.538661	0	0	306	306	0.236734	0
Macrophages	T cells	Ccr2	Klrk1	1.0086	1.11257	4.89e-78	1.94e-263	0.439486	0.524609	0	0	378	378	0.230558	0
Macrophages	T cells	Cd44	Cd160	1.0744	0.558399	1.24e-75	3.65e-208	0.623662	0.27683	0	0	303	303	0.172649	0
Macrophages	T cells	Cd44	Cd8a	1.0744	1.83975	1.24e-75	0	0.623662	1.41259	0	0	495	495	0.880981	0
Macrophages	T cells	Cd44	Cd8b1	1.0744	2.04039	1.24e-75	0	0.623662	1.57708	0	0	466	466	0.983564	0
Macrophages	T cells	Cd44	Crtam	1.0744	0.450056	1.24e-75	3.44e-176	0.623662	0.234432	0	0	238	238	0.146207	0
Macrophages	T cells	Cd44	Itga4	1.0744	0.946421	1.24e-75	9.04e-224	0.623662	0.634668	0	0	750	750	0.395818	0
Macrophages	T cells	Cd44	Itgal	1.0744	0.712307	1.24e-75	8.38e-179	0.623662	0.400804	0	0	722	722	0.249967	0
Macrophages	T cells	Cd44	Itgb1	1.0744	0.212652	1.24e-75	0.683684	0.623662	0.556815	0	0	892	892	0.347264	0
Macrophages	T cells	Cd44	Itgb2	1.0744	0.358083	1.24e-75	1.11e-06	0.623662	0.411177	0	0	568	568	0.256436	0
Macrophages	T cells	Cd44	Itgb7	1.0744	0.615201	1.24e-75	2.59e-190	0.623662	0.345574	0	0	247	247	0.215521	0
Macrophages	T cells	Cd44	Klrd1	1.0744	1.07505	1.24e-75	2e-298	0.623662	0.538661	0	0	372	372	0.335943	0
Macrophages	T cells	Cd44	Klrk1	1.0744	1.11257	1.24e-75	1.94e-263	0.623662	0.524609	0	0	523	523	0.327179	0
Macrophages	T cells	Cd84	Cd8a	0.371266	1.83975	0.187149	0	0.56307	1.41259	0	0	155	155	0.795388	0
Macrophages	T cells	Cd84	Crtam	0.371266	0.450056	0.187149	3.44e-176	0.56307	0.234432	0	0	330	330	0.132002	0
Macrophages	T cells	Cd84	Itga4	0.371266	0.946421	0.187149	9.04e-224	0.56307	0.634668	0	0	199	199	0.357362	0
Macrophages	T cells	Cd84	Itgal	0.371266	0.712307	0.187149	8.38e-179	0.56307	0.400804	0	0	314	314	0.225681	0
Macrophages	T cells	Cd84	Itgb2	0.371266	0.358083	0.187149	1.11e-06	0.56307	0.411177	0	0	487	487	0.231521	0
Macrophages	T cells	Cd84	Itgb7	0.371266	0.615201	0.187149	2.59e-190	0.56307	0.345574	0	0	155	155	0.194582	0
Macrophages	T cells	Cd84	Klrd1	0.371266	1.07505	0.187149	2e-298	0.56307	0.538661	0	0	242	242	0.303304	0
Macrophages	T cells	Cd84	Klrk1	0.371266	1.11257	0.187149	1.94e-263	0.56307	0.524609	0	0	283	283	0.295392	0
Macrophages	T cells	Cd86	Cd160	0.316407	0.558399	1	3.65e-208	0.286512	0.27683	0	0	376	376	0.0793152	0
Macrophages	T cells	Cd86	Cd8a	0.316407	1.83975	1	0	0.286512	1.41259	0	0	381	381	0.404724	0
Macrophages	T cells	Cd86	Cd8b1	0.316407	2.04039	1	0	0.286512	1.57708	0	0	316	316	0.451851	0
Macrophages	T cells	Cd86	Clec2i	0.316407	0.603355	1	2.92e-203	0.286512	0.344838	0	0	193	193	0.0988001	0
Macrophages	T cells	Cd86	Crtam	0.316407	0.450056	1	3.44e-176	0.286512	0.234432	0	0	177	177	0.0671676	0
Macrophages	T cells	Cd86	Itga4	0.316407	0.946421	1	9.04e-224	0.286512	0.634668	0	0	463	463	0.18184	0
Macrophages	T cells	Cd86	Itgal	0.316407	0.712307	1	8.38e-179	0.286512	0.400804	0	0	732	732	0.114835	0
Macrophages	T cells	Cd86	Itgb1	0.316407	0.212652	1	0.683684	0.286512	0.556815	0	0	484	484	0.159534	0
Macrophages	T cells	Cd86	Itgb2	0.316407	0.358083	1	1.11e-06	0.286512	0.411177	0	0	548	548	0.117807	0
Macrophages	T cells	Cd86	Itgb7	0.316407	0.615201	1	2.59e-190	0.286512	0.345574	0	0	240	240	0.099011	0
Macrophages	T cells	Cd86	Klrd1	0.316407	1.07505	1	2e-298	0.286512	0.538661	0	0	498	498	0.154333	0
Macrophages	T cells	Cd86	Klrk1	0.316407	1.11257	1	1.94e-263	0.286512	0.524609	0	0	631	631	0.150307	0
Macrophages	T cells	Ceacam1	Cd160	0.238641	0.558399	1	3.65e-208	0.233371	0.27683	0	0	169	169	0.0646043	0
Macrophages	T cells	Ceacam1	Crtam	0.238641	0.450056	1	3.44e-176	0.233371	0.234432	0	0	161	161	0.0547098	0
Macrophages	T cells	Ceacam1	Klrk1	0.238641	1.11257	1	1.94e-263	0.233371	0.524609	0	0	612	613	0.122429	0
Macrophages	T cells	Clec4d	Crtam	0.56015	0.450056	4.62e-19	3.44e-176	0.215638	0.234432	0	0	172	173	0.0505526	0
Macrophages	T cells	Cmklr1	Itgb2	0.352665	0.358083	1	1.11e-06	0.235529	0.411177	0	0	184	184	0.0968442	0
Macrophages	T cells	Cmklr1	Klrd1	0.352665	1.07505	1	2e-298	0.235529	0.538661	0	0	209	209	0.12687	0
Macrophages	T cells	Cmklr1	Klrk1	0.352665	1.11257	1	1.94e-263	0.235529	0.524609	0	0	220	220	0.123561	0
Macrophages	T cells	Csf1r	Itga4	0.451788	0.946421	7.34e-08	9.04e-224	1.22541	0.634668	0	0	329	329	0.777726	0
Macrophages	T cells	Csf1r	Itgal	0.451788	0.712307	7.34e-08	8.38e-179	1.22541	0.400804	0	0	379	379	0.491148	0
Macrophages	T cells	Csf1r	Itgb1	0.451788	0.212652	7.34e-08	0.683684	1.22541	0.556815	0	0	338	338	0.682324	0
Macrophages	T cells	Csf1r	Itgb2	0.451788	0.358083	7.34e-08	1.11e-06	1.22541	0.411177	0	0	777	777	0.503859	0
Macrophages	T cells	Csf1r	Itgb7	0.451788	0.615201	7.34e-08	2.59e-190	1.22541	0.345574	0	0	228	228	0.423468	0
Macrophages	T cells	Csf1r	Klrd1	0.451788	1.07505	7.34e-08	2e-298	1.22541	0.538661	0	0	167	167	0.660078	0
Macrophages	T cells	Csf1r	Klrk1	0.451788	1.11257	7.34e-08	1.94e-263	1.22541	0.524609	0	0	246	246	0.642859	0
Macrophages	T cells	Csf2ra	Itgal	0.424642	0.712307	0.00291684	8.38e-179	0.504658	0.400804	0	0	167	167	0.202269	0
Macrophages	T cells	Csf2ra	Itgb1	0.424642	0.212652	0.00291684	0.683684	0.504658	0.556815	0	0	201	201	0.281001	0
Macrophages	T cells	Csf2ra	Itgb2	0.424642	0.358083	0.00291684	1.11e-06	0.504658	0.411177	0	0	307	307	0.207503	0
Macrophages	T cells	Csf2ra	Klrd1	0.424642	1.07505	0.00291684	2e-298	0.504658	0.538661	0	0	188	188	0.271839	0
Macrophages	T cells	Csf3r	Itgal	0.896755	0.712307	4.28e-08	8.38e-179	0.574877	0.400804	0	0	194	194	0.230413	0
Macrophages	T cells	Csf3r	Itgb2	0.896755	0.358083	4.28e-08	1.11e-06	0.574877	0.411177	0	0	280	280	0.236376	0
Macrophages	T cells	Cxcr2	Itga4	1.00686	0.946421	3.18e-117	9.04e-224	0.382408	0.634668	0	0	277	277	0.242702	0
Macrophages	T cells	Cxcr2	Itgal	1.00686	0.712307	3.18e-117	8.38e-179	0.382408	0.400804	0	0	444	444	0.153271	0
Macrophages	T cells	Cxcr2	Itgb1	1.00686	0.212652	3.18e-117	0.683684	0.382408	0.556815	0	0	238	238	0.21293	0
Macrophages	T cells	Cxcr2	Itgb2	1.00686	0.358083	3.18e-117	1.11e-06	0.382408	0.411177	0	0	389	389	0.157237	0
Macrophages	T cells	Cxcr2	Klrd1	1.00686	1.07505	3.18e-117	2e-298	0.382408	0.538661	0	0	167	167	0.205988	0
Macrophages	T cells	Cxcr2	Klrk1	1.00686	1.11257	3.18e-117	1.94e-263	0.382408	0.524609	0	0	251	251	0.200615	0
Macrophages	T cells	Cxcr4	Cd160	0.557438	0.558399	7.35e-40	3.65e-208	0.311514	0.27683	0	0	182	182	0.0862365	0
Macrophages	T cells	Cxcr4	Clec2i	0.557438	0.603355	7.35e-40	2.92e-203	0.311514	0.344838	0	0	171	171	0.107422	0
Macrophages	T cells	Cxcr4	Itga4	0.557438	0.946421	7.35e-40	9.04e-224	0.311514	0.634668	0	0	629	629	0.197708	0
Macrophages	T cells	Cxcr4	Itgal	0.557438	0.712307	7.35e-40	8.38e-179	0.311514	0.400804	0	0	555	555	0.124856	0
Macrophages	T cells	Cxcr4	Itgb1	0.557438	0.212652	7.35e-40	0.683684	0.311514	0.556815	0	0	641	641	0.173455	0
Macrophages	T cells	Cxcr4	Itgb2	0.557438	0.358083	7.35e-40	1.11e-06	0.311514	0.411177	0	0	441	441	0.128087	0
Macrophages	T cells	Cxcr4	Itgb7	0.557438	0.615201	7.35e-40	2.59e-190	0.311514	0.345574	0	0	223	223	0.107651	0
Macrophages	T cells	Cxcr4	Klrd1	0.557438	1.07505	7.35e-40	2e-298	0.311514	0.538661	0	0	257	257	0.1678	0
Macrophages	T cells	Cxcr4	Klrk1	0.557438	1.11257	7.35e-40	1.94e-263	0.311514	0.524609	0	0	411	411	0.163423	0
Macrophages	T cells	Fcer1g	Itga4	1.46239	0.946421	5.68e-46	9.04e-224	3.10736	0.634668	0	0	178	178	1.97214	0
Macrophages	T cells	Fcer1g	Itgal	1.46239	0.712307	5.68e-46	8.38e-179	3.10736	0.400804	0	0	399	399	1.24544	0
Macrophages	T cells	Fcer1g	Itgb1	1.46239	0.212652	5.68e-46	0.683684	3.10736	0.556815	0	0	226	226	1.73023	0
Macrophages	T cells	Fcer1g	Itgb7	1.46239	0.615201	5.68e-46	2.59e-190	3.10736	0.345574	0	0	246	246	1.07382	0
Macrophages	T cells	Fcer1g	Klrd1	1.46239	1.07505	5.68e-46	2e-298	3.10736	0.538661	0	0	267	267	1.67382	0
Macrophages	T cells	Fcer1g	Klrk1	1.46239	1.11257	5.68e-46	1.94e-263	3.10736	0.524609	0	0	283	283	1.63015	0
Macrophages	T cells	Fcgr1	Itga4	0.371963	0.946421	1	9.04e-224	0.391974	0.634668	0	0	211	211	0.248773	0
Macrophages	T cells	Fcgr1	Itgal	0.371963	0.712307	1	8.38e-179	0.391974	0.400804	0	0	536	536	0.157105	0
Macrophages	T cells	Fcgr1	Itgb1	0.371963	0.212652	1	0.683684	0.391974	0.556815	0	0	208	208	0.218257	0
Macrophages	T cells	Fcgr1	Itgb2	0.371963	0.358083	1	1.11e-06	0.391974	0.411177	0	0	559	559	0.161171	0
Macrophages	T cells	Fcgr1	Itgb7	0.371963	0.615201	1	2.59e-190	0.391974	0.345574	0	0	187	187	0.135456	0
Macrophages	T cells	Fcgr1	Klrk1	0.371963	1.11257	1	1.94e-263	0.391974	0.524609	0	0	265	265	0.205633	0
Macrophages	T cells	Fcgr2b	Itga4	0.686643	0.946421	2.31e-12	9.04e-224	0.521267	0.634668	0	0	469	469	0.330832	0
Macrophages	T cells	Fcgr2b	Itgal	0.686643	0.712307	2.31e-12	8.38e-179	0.521267	0.400804	0	0	541	541	0.208926	0
Macrophages	T cells	Fcgr2b	Itgb1	0.686643	0.212652	2.31e-12	0.683684	0.521267	0.556815	0	0	305	305	0.290249	0
Macrophages	T cells	Fcgr2b	Itgb2	0.686643	0.358083	2.31e-12	1.11e-06	0.521267	0.411177	0	0	558	558	0.214333	0
Macrophages	T cells	Fcgr2b	Klrd1	0.686643	1.07505	2.31e-12	2e-298	0.521267	0.538661	0	0	293	293	0.280786	0
Macrophages	T cells	Fcgr2b	Klrk1	0.686643	1.11257	2.31e-12	1.94e-263	0.521267	0.524609	0	0	453	453	0.273462	0
Macrophages	T cells	Fcgr3	Itga4	0.576525	0.946421	8.41e-08	9.04e-224	1.18002	0.634668	0	0	252	252	0.748922	0
Macrophages	T cells	Fcgr3	Itgal	0.576525	0.712307	8.41e-08	8.38e-179	1.18002	0.400804	0	0	406	406	0.472958	0
Macrophages	T cells	Fcgr3	Itgb1	0.576525	0.212652	8.41e-08	0.683684	1.18002	0.556815	0	0	216	216	0.657054	0
Macrophages	T cells	Fcgr3	Itgb2	0.576525	0.358083	8.41e-08	1.11e-06	1.18002	0.411177	0	0	487	487	0.485198	0
Macrophages	T cells	Fcgr3	Klrd1	0.576525	1.07505	8.41e-08	2e-298	1.18002	0.538661	0	0	173	173	0.635632	0
Macrophages	T cells	Fcgr3	Klrk1	0.576525	1.11257	8.41e-08	1.94e-263	1.18002	0.524609	0	0	263	263	0.619051	0
Macrophages	T cells	Gpr65	Crtam	0.570249	0.450056	2.95e-08	3.44e-176	0.373582	0.234432	0	0	290	290	0.0875796	0
Macrophages	T cells	Gpr65	Itgal	0.570249	0.712307	2.95e-08	8.38e-179	0.373582	0.400804	0	0	413	413	0.149733	0
Macrophages	T cells	Gpr65	Itgb2	0.570249	0.358083	2.95e-08	1.11e-06	0.373582	0.411177	0	0	474	474	0.153608	0
Macrophages	T cells	Gpr65	Itgb7	0.570249	0.615201	2.95e-08	2.59e-190	0.373582	0.345574	0	0	181	181	0.1291	0
Macrophages	T cells	Gpr65	Klrd1	0.570249	1.07505	2.95e-08	2e-298	0.373582	0.538661	0	0	273	273	0.201234	0
Macrophages	T cells	Ifngr1	Itgal	0.214181	0.712307	1	8.38e-179	0.607606	0.400804	0	0	167	167	0.243531	0
Macrophages	T cells	Ifngr1	Itgb1	0.214181	0.212652	1	0.683684	0.607606	0.556815	0	0	159	159	0.338324	0
Macrophages	T cells	Ifngr1	Klrk1	0.214181	1.11257	1	1.94e-263	0.607606	0.524609	0	0	179	179	0.318756	0
Macrophages	T cells	Il10rb	Itgb2	0.340946	0.358083	1	1.11e-06	0.704053	0.411177	0	0	289	289	0.28949	0
Macrophages	T cells	Il13ra1	Itgb1	0.221456	0.212652	1	0.683684	0.254049	0.556815	0	0	170	170	0.141458	0
Macrophages	T cells	Il17ra	Itgal	0.591101	0.712307	8.06e-08	8.38e-179	0.40646	0.400804	0	0	173	173	0.162911	0
Macrophages	T cells	Il17ra	Itgb2	0.591101	0.358083	8.06e-08	1.11e-06	0.40646	0.411177	0	0	201	201	0.167127	0
Macrophages	T cells	Il1r2	Itgal	0.542269	0.712307	8.68e-50	8.38e-179	0.178042	0.400804	0	0	168	168	0.0713599	0
Macrophages	T cells	Il1r2	Itgb2	0.542269	0.358083	8.68e-50	1.11e-06	0.178042	0.411177	0	0	212	212	0.0732066	0
Macrophages	T cells	Il2rg	Cd160	0.171476	0.558399	1	3.65e-208	0.178527	0.27683	0	0	175	175	0.0494217	0
Macrophages	T cells	Il2rg	Itga4	0.171476	0.946421	1	9.04e-224	0.178527	0.634668	0	0	397	397	0.113305	0
Macrophages	T cells	Il2rg	Itgal	0.171476	0.712307	1	8.38e-179	0.178527	0.400804	0	0	541	541	0.0715543	0
Macrophages	T cells	Il2rg	Itgb1	0.171476	0.212652	1	0.683684	0.178527	0.556815	0	0	209	209	0.0994064	0
Macrophages	T cells	Il2rg	Itgb2	0.171476	0.358083	1	1.11e-06	0.178527	0.411177	0	0	640	640	0.0734061	0
Macrophages	T cells	Il2rg	Itgb7	0.171476	0.615201	1	2.59e-190	0.178527	0.345574	0	0	205	205	0.0616942	0
Macrophages	T cells	Il2rg	Klrd1	0.171476	1.07505	1	2e-298	0.178527	0.538661	0	0	411	411	0.0961655	0
Macrophages	T cells	Il2rg	Klrk1	0.171476	1.11257	1	1.94e-263	0.178527	0.524609	0	0	517	517	0.0936568	0
Macrophages	T cells	Il6ra	Itga4	0.478749	0.946421	3.5e-06	9.04e-224	0.467206	0.634668	0	0	247	247	0.296521	0
Macrophages	T cells	Il6ra	Itgal	0.478749	0.712307	3.5e-06	8.38e-179	0.467206	0.400804	0	0	261	261	0.187258	0
Macrophages	T cells	Il6ra	Itgb1	0.478749	0.212652	3.5e-06	0.683684	0.467206	0.556815	0	0	170	170	0.260147	0
Macrophages	T cells	Il6ra	Itgb2	0.478749	0.358083	3.5e-06	1.11e-06	0.467206	0.411177	0	0	206	206	0.192104	0
Macrophages	T cells	Il6ra	Klrk1	0.478749	1.11257	3.5e-06	1.94e-263	0.467206	0.524609	0	0	165	165	0.245101	0
Macrophages	T cells	Itga4	Cd160	0.557893	0.558399	3.08e-26	3.65e-208	0.375532	0.27683	0	0	169	169	0.103959	0
Macrophages	T cells	Itga4	Klrd1	0.557893	1.07505	3.08e-26	2e-298	0.375532	0.538661	0	0	211	211	0.202284	0
Macrophages	T cells	Itga4	Klrk1	0.557893	1.11257	3.08e-26	1.94e-263	0.375532	0.524609	0	0	298	298	0.197007	0
Macrophages	T cells	Itgal	Cd160	0.53885	0.558399	1.67e-22	3.65e-208	0.276461	0.27683	0	0	197	197	0.0765327	0
Macrophages	T cells	Itgal	Klrd1	0.53885	1.07505	1.67e-22	2e-298	0.276461	0.538661	0	0	555	555	0.148919	0
Macrophages	T cells	Itgal	Klrk1	0.53885	1.11257	1.67e-22	1.94e-263	0.276461	0.524609	0	0	586	586	0.145034	0
Macrophages	T cells	Itgam	Cd160	0.41296	0.558399	0.0195956	3.65e-208	0.462689	0.27683	0	0	285	285	0.128086	0
Macrophages	T cells	Itgam	Klrd1	0.41296	1.07505	0.0195956	2e-298	0.462689	0.538661	0	0	447	447	0.249232	0
Macrophages	T cells	Itgam	Klrk1	0.41296	1.11257	0.0195956	1.94e-263	0.462689	0.524609	0	0	636	636	0.242731	0
Macrophages	T cells	Itgb2	Klrd1	0.641712	1.07505	7.56e-09	2e-298	0.614281	0.538661	0	0	260	260	0.330889	0
Macrophages	T cells	Itgb2	Klrk1	0.641712	1.11257	7.56e-09	1.94e-263	0.614281	0.524609	0	0	379	379	0.322257	0
Macrophages	T cells	Itgb7	Clec2i	0.441139	0.603355	8.68e-22	2.92e-203	0.218728	0.344838	0	0	220	220	0.0754256	0
Macrophages	T cells	Itgb7	Klrd1	0.441139	1.07505	8.68e-22	2e-298	0.218728	0.538661	0	0	240	240	0.11782	0
Macrophages	T cells	Itgb7	Klrk1	0.441139	1.11257	8.68e-22	1.94e-263	0.218728	0.524609	0	0	261	261	0.114747	0
Macrophages	T cells	Lair1	Cd160	0.246367	0.558399	1	3.65e-208	0.51171	0.27683	0	0	221	221	0.141657	0
Macrophages	T cells	Lair1	Crtam	0.246367	0.450056	1	3.44e-176	0.51171	0.234432	0	0	253	253	0.119961	0
Macrophages	T cells	Lilrb4a	Cd160	0.894657	0.558399	3.38e-35	3.65e-208	0.598366	0.27683	0	0	529	529	0.165646	0
Macrophages	T cells	Lilrb4a	Itgal	0.894657	0.712307	3.38e-35	8.38e-179	0.598366	0.400804	0	0	203	203	0.239828	0
Macrophages	T cells	Lilrb4a	Itgb2	0.894657	0.358083	3.38e-35	1.11e-06	0.598366	0.411177	0	0	652	652	0.246034	0
Macrophages	T cells	Lilrb4a	Klrd1	0.894657	1.07505	3.38e-35	2e-298	0.598366	0.538661	0	0	289	289	0.322317	0
Macrophages	T cells	Lilrb4a	Klrk1	0.894657	1.11257	3.38e-35	1.94e-263	0.598366	0.524609	0	0	199	199	0.313908	0
Macrophages	T cells	Ptger4	Cd160	0.285177	0.558399	1.64e-12	3.65e-208	0.182944	0.27683	0	0	280	280	0.0506444	0
Macrophages	T cells	Ptger4	Klrk1	0.285177	1.11257	1.64e-12	1.94e-263	0.182944	0.524609	0	0	158	158	0.0959739	0
Macrophages	T cells	Tnfrsf1a	Cd160	0.450631	0.558399	0.156678	3.65e-208	0.564911	0.27683	0	0	470	470	0.156385	0
Macrophages	T cells	Tnfrsf1a	Klrk1	0.450631	1.11257	0.156678	1.94e-263	0.564911	0.524609	0	0	252	252	0.296357	0
Macrophages	T cells	Fcer1g	Cd247	1.46239	0.776987	5.68e-46	0	3.10736	0.439521	493	0	156	554	1.36575	0
Macrophages	T cells	Itgb2	Itgal	0.641712	0.712307	7.56e-09	8.38e-179	0.614281	0.400804	538	900	942	997	0.246206	0
Macrophages	T cells	Fcgr1	Cd247	0.371963	0.776987	1	0	0.391974	0.439521	0	900	243	921	0.172281	0
Macrophages	T cells	Fcgr2b	Cd247	0.686643	0.776987	2.31e-12	0	0.521267	0.439521	0	900	276	924	0.229108	0
Macrophages	T cells	Fcgr3	Cd247	0.576525	0.776987	8.41e-08	0	1.18002	0.439521	0	900	383	935	0.518645	0
Macrophages	T cells	Fcgr4	Cd247	0.697967	0.776987	1.03e-15	0	0.2931	0.439521	0	900	444	942	0.128824	0
Macrophages	T cells	Fcgr1	Cd3g	0.371963	2.51845	1	0	0.391974	2.27827	0	900	104	906	0.893024	0
Macrophages	T cells	Fcgr2b	Cd3g	0.686643	2.51845	2.31e-12	0	0.521267	2.27827	0	900	306	927	1.18759	0
Macrophages	T cells	Fcgr3	Cd3g	0.576525	2.51845	8.41e-08	0	1.18002	2.27827	0	900	459	943	2.68841	0
Macrophages	T cells	Fcgr4	Cd3g	0.697967	2.51845	1.03e-15	0	0.2931	2.27827	0	900	165	912	0.667762	0
Macrophages	T cells	Itgal	Itga4	0.53885	0.946421	1.67e-22	9.04e-224	0.276461	0.634668	0	720	399	824	0.175461	0
Macrophages	T cells	Itgam	Itga4	0.41296	0.946421	0.0195956	9.04e-224	0.462689	0.634668	0	360	325	549	0.293654	0
Macrophages	T cells	Itgb2	Itga4	0.641712	0.946421	7.56e-09	9.04e-224	0.614281	0.634668	0	720	839	953	0.389864	0
Macrophages	T cells	Itgb7	Itga4	0.441139	0.946421	8.68e-22	9.04e-224	0.218728	0.634668	0	900	908	990	0.138819	0
Macrophages	T cells	Ceacam1	Itgal	0.238641	0.712307	1	8.38e-179	0.233371	0.400804	0	900	127	909	0.0935363	0
Macrophages	T cells	Clec12a	Itgal	1.05969	0.712307	0	8.38e-179	0.621843	0.400804	0	900	141	910	0.249237	0
Macrophages	T cells	Clec4d	Itgal	0.56015	0.712307	4.62e-19	8.38e-179	0.215638	0.400804	0	900	180	914	0.0864288	0
Macrophages	T cells	Itgam	Itgal	0.41296	0.712307	0.0195956	8.38e-179	0.462689	0.400804	0	900	269	923	0.185448	0
Macrophages	T cells	Itgb7	Itgal	0.441139	0.712307	8.68e-22	8.38e-179	0.218728	0.400804	0	720	715	917	0.087667	0
Macrophages	T cells	Lair1	Itgal	0.246367	0.712307	1	8.38e-179	0.51171	0.400804	0	900	224	919	0.205095	0
Macrophages	T cells	Plaur	Itgal	0.673505	0.712307	1.53e-08	8.38e-179	0.452801	0.400804	0	900	201	916	0.181485	0
Macrophages	T cells	Ceacam1	Itgb1	0.238641	0.212652	1	0.683684	0.233371	0.556815	0	900	136	910	0.129945	0
Macrophages	T cells	Itgb2	Itgb1	0.641712	0.212652	7.56e-09	0.683684	0.614281	0.556815	0	800	98	812	0.34204	0
Macrophages	T cells	Itgb7	Itgb1	0.441139	0.212652	8.68e-22	0.683684	0.218728	0.556815	0	720	92	735	0.121791	0
Macrophages	T cells	Cd300a	Itgb2	0.869613	0.358083	1.42e-33	1.11e-06	0.608586	0.411177	0	900	398	937	0.250236	0
Macrophages	T cells	Ceacam1	Itgb2	0.238641	0.358083	1	1.11e-06	0.233371	0.411177	0	900	138	910	0.0959569	0
Macrophages	T cells	Clec12a	Itgb2	1.05969	0.358083	0	1.11e-06	0.621843	0.411177	0	900	182	914	0.255688	0
Macrophages	T cells	Clec4d	Itgb2	0.56015	0.358083	4.62e-19	1.11e-06	0.215638	0.411177	0	900	423	939	0.0886655	0
Macrophages	T cells	Itgb7	Itgb2	0.441139	0.358083	8.68e-22	1.11e-06	0.218728	0.411177	0	720	254	782	0.0899358	0
Macrophages	T cells	Lair1	Itgb2	0.246367	0.358083	1	1.11e-06	0.51171	0.411177	0	900	416	939	0.210403	0
Macrophages	T cells	Plaur	Itgb2	0.673505	0.358083	1.53e-08	1.11e-06	0.452801	0.411177	0	900	299	926	0.186181	0
Macrophages	T cells	Ptafr	Itgb2	0.593498	0.358083	4.62e-09	1.11e-06	0.474388	0.411177	0	900	251	921	0.195057	0
Macrophages	T cells	Adgre1	B2m	0.368601	0.464139	1	1.59e-27	0.335329	3.55004	0	0	287	287	1.19043	0
Macrophages	T cells	Ccr1	B2m	1.05253	0.464139	0	1.59e-27	0.534991	3.55004	0	0	210	210	1.89924	0
Macrophages	T cells	Ccr2	B2m	1.0086	0.464139	4.89e-78	1.59e-27	0.439486	3.55004	0	0	234	234	1.56019	0
Macrophages	T cells	Cd44	B2m	1.0744	0.464139	1.24e-75	1.59e-27	0.623662	3.55004	0	0	472	472	2.21402	0
Macrophages	T cells	Cd84	B2m	0.371266	0.464139	0.187149	1.59e-27	0.56307	3.55004	0	0	150	150	1.99892	0
Macrophages	T cells	Cd86	B2m	0.316407	0.464139	1	1.59e-27	0.286512	3.55004	0	0	375	375	1.01713	0
Macrophages	T cells	Ceacam1	B2m	0.238641	0.464139	1	1.59e-27	0.233371	3.55004	0	0	160	160	0.828477	0
Macrophages	T cells	Csf1r	B2m	0.451788	0.464139	7.34e-08	1.59e-27	1.22541	3.55004	0	0	257	257	4.35024	0
Macrophages	T cells	Csf3r	B2m	0.896755	0.464139	4.28e-08	1.59e-27	0.574877	3.55004	0	0	150	150	2.04083	0
Macrophages	T cells	Cxcr4	B2m	0.557438	0.464139	7.35e-40	1.59e-27	0.311514	3.55004	0	0	464	464	1.10589	0
Macrophages	T cells	Fcer1g	B2m	1.46239	0.464139	5.68e-46	1.59e-27	3.10736	3.55004	0	0	278	278	11.0313	0
Macrophages	T cells	Fcgr1	B2m	0.371963	0.464139	1	1.59e-27	0.391974	3.55004	0	0	178	178	1.39152	0
Macrophages	T cells	Fcgr2b	B2m	0.686643	0.464139	2.31e-12	1.59e-27	0.521267	3.55004	0	0	288	288	1.85052	0
Macrophages	T cells	Fcgr3	B2m	0.576525	0.464139	8.41e-08	1.59e-27	1.18002	3.55004	0	0	159	159	4.18912	0
Macrophages	T cells	Fcgr4	B2m	0.697967	0.464139	1.03e-15	1.59e-27	0.2931	3.55004	0	0	191	191	1.04052	0
Macrophages	T cells	Ifngr1	B2m	0.214181	0.464139	1	1.59e-27	0.607606	3.55004	0	0	253	253	2.15703	0
Macrophages	T cells	Il10rb	B2m	0.340946	0.464139	1	1.59e-27	0.704053	3.55004	0	0	218	218	2.49941	0
Macrophages	T cells	Il13ra1	B2m	0.221456	0.464139	1	1.59e-27	0.254049	3.55004	0	0	171	171	0.901885	0
Macrophages	T cells	Il1r2	B2m	0.542269	0.464139	8.68e-50	1.59e-27	0.178042	3.55004	0	0	176	176	0.632055	0
Macrophages	T cells	Il2rg	B2m	0.171476	0.464139	1	1.59e-27	0.178527	3.55004	0	0	366	366	0.633777	0
Macrophages	T cells	Il6ra	B2m	0.478749	0.464139	3.5e-06	1.59e-27	0.467206	3.55004	0	0	215	215	1.6586	0
Macrophages	T cells	Itga4	B2m	0.557893	0.464139	3.08e-26	1.59e-27	0.375532	3.55004	0	0	213	213	1.33315	0
Macrophages	T cells	Itgal	B2m	0.53885	0.464139	1.67e-22	1.59e-27	0.276461	3.55004	0	0	469	469	0.981445	0
Macrophages	T cells	Itgam	B2m	0.41296	0.464139	0.0195956	1.59e-27	0.462689	3.55004	0	0	355	355	1.64256	0
Macrophages	T cells	Itgb2	B2m	0.641712	0.464139	7.56e-09	1.59e-27	0.614281	3.55004	0	0	352	352	2.18072	0
Macrophages	T cells	Lilrb4a	B2m	0.894657	0.464139	3.38e-35	1.59e-27	0.598366	3.55004	0	0	296	296	2.12422	0
Macrophages	T cells	Mrc1	B2m	0.957335	0.464139	2.66e-104	1.59e-27	0.373312	3.55004	0	0	197	197	1.32527	0
Macrophages	T cells	Notch2	B2m	0.743779	0.464139	4.19e-05	1.59e-27	0.625217	3.55004	0	0	188	188	2.21954	0
Macrophages	T cells	Plaur	B2m	0.673505	0.464139	1.53e-08	1.59e-27	0.452801	3.55004	0	0	164	164	1.60746	0
Macrophages	T cells	Tnfrsf1a	B2m	0.450631	0.464139	0.156678	1.59e-27	0.564911	3.55004	0	0	297	297	2.00545	0
Macrophages	T cells	Trem3	B2m	0.796053	0.464139	3e-265	1.59e-27	0.395461	3.55004	0	0	170	170	1.4039	0
Macrophages	T cells	Treml4	B2m	0.568739	0.464139	3.68e-114	1.59e-27	0.216429	3.55004	0	0	203	203	0.768332	0
Macrophages	T cells	Vsir	Cd160	0.48437	0.558399	1.17e-06	3.65e-208	0.863238	0.27683	0	0	323	323	0.238971	0
Macrophages	T cells	Ccr2	Cd247	1.0086	0.776987	4.89e-78	0	0.439486	0.439521	0	0	157	157	0.193163	0
Macrophages	T cells	Cd300a	Cd247	0.869613	0.776987	1.42e-33	0	0.608586	0.439521	0	0	317	317	0.267486	0
Macrophages	T cells	Cd300lf	Cd247	0.576342	0.776987	1.79e-33	0	0.260129	0.439521	0	0	168	168	0.114332	0
Macrophages	T cells	Cd44	Cd247	1.0744	0.776987	1.24e-75	0	0.623662	0.439521	0	0	234	234	0.274113	0
Macrophages	T cells	Cd84	Cd247	0.371266	0.776987	0.187149	0	0.56307	0.439521	0	0	257	257	0.247481	0
Macrophages	T cells	Cd86	Cd247	0.316407	0.776987	1	0	0.286512	0.439521	0	0	325	325	0.125928	0
Macrophages	T cells	Clec12a	Cd247	1.05969	0.776987	0	0	0.621843	0.439521	0	0	200	200	0.273313	0
Macrophages	T cells	Csf1r	Cd247	0.451788	0.776987	7.34e-08	0	1.22541	0.439521	0	0	169	169	0.538592	0
Macrophages	T cells	Csf2ra	Cd247	0.424642	0.776987	0.00291684	0	0.504658	0.439521	0	0	191	191	0.221808	0
Macrophages	T cells	Cxcr4	Cd247	0.557438	0.776987	7.35e-40	0	0.311514	0.439521	0	0	181	181	0.136917	0
Macrophages	T cells	Il17ra	Cd247	0.591101	0.776987	8.06e-08	0	0.40646	0.439521	0	0	287	287	0.178648	0
Macrophages	T cells	Il2rg	Cd247	0.171476	0.776987	1	0	0.178527	0.439521	0	0	251	251	0.0784663	0
Macrophages	T cells	Il6ra	Cd247	0.478749	0.776987	3.5e-06	0	0.467206	0.439521	0	0	167	167	0.205347	0
Macrophages	T cells	Itgal	Cd247	0.53885	0.776987	1.67e-22	0	0.276461	0.439521	0	0	209	209	0.12151	0
Macrophages	T cells	Itgam	Cd247	0.41296	0.776987	0.0195956	0	0.462689	0.439521	0	0	329	329	0.203361	0
Macrophages	T cells	Itgb2	Cd247	0.641712	0.776987	7.56e-09	0	0.614281	0.439521	0	0	209	209	0.269989	0
Macrophages	T cells	Lair1	Cd247	0.246367	0.776987	1	0	0.51171	0.439521	0	0	184	184	0.224907	0
Macrophages	T cells	Lilrb4a	Cd247	0.894657	0.776987	3.38e-35	0	0.598366	0.439521	0	0	164	164	0.262995	0
Macrophages	T cells	Tnfrsf1a	Cd247	0.450631	0.776987	0.156678	0	0.564911	0.439521	0	0	175	175	0.24829	0
Macrophages	T cells	Treml4	Cd247	0.568739	0.776987	3.68e-114	0	0.216429	0.439521	0	0	224	224	0.0951253	0
Macrophages	T cells	Ccr1	Cd3d	1.05253	2.18853	0	0	0.534991	1.89805	0	0	185	185	1.01544	0
Macrophages	T cells	Cd44	Cd3d	1.0744	2.18853	1.24e-75	0	0.623662	1.89805	0	0	182	182	1.18374	0
Macrophages	T cells	Cd84	Cd3d	0.371266	2.18853	0.187149	0	0.56307	1.89805	0	0	218	218	1.06873	0
Macrophages	T cells	Cd86	Cd3d	0.316407	2.18853	1	0	0.286512	1.89805	0	0	280	280	0.543812	0
Macrophages	T cells	Clec12a	Cd3d	1.05969	2.18853	0	0	0.621843	1.89805	0	0	317	317	1.18029	0
Macrophages	T cells	Clec4d	Cd3d	0.56015	2.18853	4.62e-19	0	0.215638	1.89805	0	0	189	189	0.409291	0
Macrophages	T cells	Cxcr4	Cd3d	0.557438	2.18853	7.35e-40	0	0.311514	1.89805	0	0	197	197	0.591267	0
Macrophages	T cells	Cysltr1	Cd3d	0.184262	2.18853	1	0	0.15324	1.89805	0	0	154	154	0.290857	0
Macrophages	T cells	Fcer1g	Cd3d	1.46239	2.18853	5.68e-46	0	3.10736	1.89805	0	0	387	387	5.89792	0
Macrophages	T cells	Fcgr2b	Cd3d	0.686643	2.18853	2.31e-12	0	0.521267	1.89805	0	0	224	224	0.989389	0
Macrophages	T cells	Fcgr3	Cd3d	0.576525	2.18853	8.41e-08	0	1.18002	1.89805	0	0	205	205	2.23974	0
Macrophages	T cells	Fcgr4	Cd3d	0.697967	2.18853	1.03e-15	0	0.2931	1.89805	0	0	250	250	0.556318	0
Macrophages	T cells	Gpr183	Cd3d	0.302188	2.18853	1	0	0.193456	1.89805	0	0	196	196	0.367188	0
Macrophages	T cells	Gpr65	Cd3d	0.570249	2.18853	2.95e-08	0	0.373582	1.89805	0	0	179	179	0.709075	0
Macrophages	T cells	Il17ra	Cd3d	0.591101	2.18853	8.06e-08	0	0.40646	1.89805	0	0	232	232	0.77148	0
Macrophages	T cells	Il2rg	Cd3d	0.171476	2.18853	1	0	0.178527	1.89805	0	0	386	386	0.338852	0
Macrophages	T cells	Itga4	Cd3d	0.557893	2.18853	3.08e-26	0	0.375532	1.89805	0	0	188	188	0.712776	0
Macrophages	T cells	Itgal	Cd3d	0.53885	2.18853	1.67e-22	0	0.276461	1.89805	0	0	368	368	0.524735	0
Macrophages	T cells	Itgam	Cd3d	0.41296	2.18853	0.0195956	0	0.462689	1.89805	0	0	184	184	0.878204	0
Macrophages	T cells	Itgb2	Cd3d	0.641712	2.18853	7.56e-09	0	0.614281	1.89805	0	0	247	247	1.16593	0
Macrophages	T cells	Itgb7	Cd3d	0.441139	2.18853	8.68e-22	0	0.218728	1.89805	0	0	365	365	0.415155	0
Macrophages	T cells	Mrc1	Cd3d	0.957335	2.18853	2.66e-104	0	0.373312	1.89805	0	0	175	175	0.708564	0
Macrophages	T cells	Adgre1	Cd3e	0.368601	1.79275	1	0	0.335329	1.38202	0	0	690	690	0.463431	0
Macrophages	T cells	Ccr1	Cd3e	1.05253	1.79275	0	0	0.534991	1.38202	0	0	202	202	0.739368	0
Macrophages	T cells	Ccr2	Cd3e	1.0086	1.79275	4.89e-78	0	0.439486	1.38202	0	0	315	315	0.607378	0
Macrophages	T cells	Cd300a	Cd3e	0.869613	1.79275	1.42e-33	0	0.608586	1.38202	0	0	155	155	0.841078	0
Macrophages	T cells	Cd44	Cd3e	1.0744	1.79275	1.24e-75	0	0.623662	1.38202	0	0	650	650	0.861914	0
Macrophages	T cells	Cd84	Cd3e	0.371266	1.79275	0.187149	0	0.56307	1.38202	0	0	155	155	0.778173	0
Macrophages	T cells	Cd86	Cd3e	0.316407	1.79275	1	0	0.286512	1.38202	0	0	556	556	0.395965	0
Macrophages	T cells	Csf1r	Cd3e	0.451788	1.79275	7.34e-08	0	1.22541	1.38202	0	0	483	483	1.69354	0
Macrophages	T cells	Csf2ra	Cd3e	0.424642	1.79275	0.00291684	0	0.504658	1.38202	0	0	286	286	0.697447	0
Macrophages	T cells	Csf3r	Cd3e	0.896755	1.79275	4.28e-08	0	0.574877	1.38202	0	0	256	256	0.794491	0
Macrophages	T cells	Cxcr2	Cd3e	1.00686	1.79275	3.18e-117	0	0.382408	1.38202	0	0	219	219	0.528495	0
Macrophages	T cells	Cxcr4	Cd3e	0.557438	1.79275	7.35e-40	0	0.311514	1.38202	0	0	285	285	0.430518	0
Macrophages	T cells	Fcer1g	Cd3e	1.46239	1.79275	5.68e-46	0	3.10736	1.38202	0	0	435	435	4.29444	0
Macrophages	T cells	Fcgr1	Cd3e	0.371963	1.79275	1	0	0.391974	1.38202	0	0	358	358	0.541716	0
Macrophages	T cells	Fcgr2b	Cd3e	0.686643	1.79275	2.31e-12	0	0.521267	1.38202	0	0	694	694	0.720402	0
Macrophages	T cells	Fcgr3	Cd3e	0.576525	1.79275	8.41e-08	0	1.18002	1.38202	0	0	461	461	1.63081	0
Macrophages	T cells	Fcgr4	Cd3e	0.697967	1.79275	1.03e-15	0	0.2931	1.38202	0	0	244	244	0.40507	0
Macrophages	T cells	Il17ra	Cd3e	0.591101	1.79275	8.06e-08	0	0.40646	1.38202	0	0	206	206	0.561736	0
Macrophages	T cells	Il2rg	Cd3e	0.171476	1.79275	1	0	0.178527	1.38202	0	0	433	433	0.246728	0
Macrophages	T cells	Il6ra	Cd3e	0.478749	1.79275	3.5e-06	0	0.467206	1.38202	0	0	154	154	0.645688	0
Macrophages	T cells	Itga4	Cd3e	0.557893	1.79275	3.08e-26	0	0.375532	1.38202	0	0	323	323	0.518992	0
Macrophages	T cells	Itgal	Cd3e	0.53885	1.79275	1.67e-22	0	0.276461	1.38202	0	0	464	464	0.382074	0
Macrophages	T cells	Itgam	Cd3e	0.41296	1.79275	0.0195956	0	0.462689	1.38202	0	0	806	806	0.639445	0
Macrophages	T cells	Itgb2	Cd3e	0.641712	1.79275	7.56e-09	0	0.614281	1.38202	0	0	217	217	0.848948	0
Macrophages	T cells	Itgb7	Cd3e	0.441139	1.79275	8.68e-22	0	0.218728	1.38202	0	0	241	241	0.302286	0
Macrophages	T cells	Mrc1	Cd3e	0.957335	1.79275	2.66e-104	0	0.373312	1.38202	0	0	320	320	0.515925	0
Macrophages	T cells	Tnfrsf1a	Cd3e	0.450631	1.79275	0.156678	0	0.564911	1.38202	0	0	160	160	0.780718	0
Macrophages	T cells	Ccr1	Cd3g	1.05253	2.51845	0	0	0.534991	2.27827	0	0	165	165	1.21885	0
Macrophages	T cells	Cd84	Cd3g	0.371266	2.51845	0.187149	0	0.56307	2.27827	0	0	329	329	1.28283	0
Macrophages	T cells	Cd86	Cd3g	0.316407	2.51845	1	0	0.286512	2.27827	0	0	316	316	0.652751	0
Macrophages	T cells	Clec12a	Cd3g	1.05969	2.51845	0	0	0.621843	2.27827	0	0	243	243	1.41673	0
Macrophages	T cells	Clec4d	Cd3g	0.56015	2.51845	4.62e-19	0	0.215638	2.27827	0	0	182	182	0.491283	0
Macrophages	T cells	Csf1r	Cd3g	0.451788	2.51845	7.34e-08	0	1.22541	2.27827	0	0	162	162	2.79181	0
Macrophages	T cells	Cxcr4	Cd3g	0.557438	2.51845	7.35e-40	0	0.311514	2.27827	0	0	202	202	0.709713	0
Macrophages	T cells	Fcer1g	Cd3g	1.46239	2.51845	5.68e-46	0	3.10736	2.27827	0	0	469	469	7.07942	0
Macrophages	T cells	Gpr65	Cd3g	0.570249	2.51845	2.95e-08	0	0.373582	2.27827	0	0	239	239	0.85112	0
Macrophages	T cells	Il17ra	Cd3g	0.591101	2.51845	8.06e-08	0	0.40646	2.27827	0	0	251	251	0.926027	0
Macrophages	T cells	Il1r2	Cd3g	0.542269	2.51845	8.68e-50	0	0.178042	2.27827	0	0	174	174	0.405627	0
Macrophages	T cells	Il2rg	Cd3g	0.171476	2.51845	1	0	0.178527	2.27827	0	0	454	454	0.406733	0
Macrophages	T cells	Itgal	Cd3g	0.53885	2.51845	1.67e-22	0	0.276461	2.27827	0	0	452	452	0.629852	0
Macrophages	T cells	Itgam	Cd3g	0.41296	2.51845	0.0195956	0	0.462689	2.27827	0	0	181	181	1.05413	0
Macrophages	T cells	Itgb2	Cd3g	0.641712	2.51845	7.56e-09	0	0.614281	2.27827	0	0	299	299	1.3995	0
Macrophages	T cells	Itgb7	Cd3g	0.441139	2.51845	8.68e-22	0	0.218728	2.27827	0	0	452	452	0.498321	0
Macrophages	T cells	Mrc1	Cd3g	0.957335	2.51845	2.66e-104	0	0.373312	2.27827	0	0	158	158	0.850507	0
Macrophages	T cells	Adgre1	Cd8a	0.368601	1.83975	1	0	0.335329	1.41259	0	0	469	469	0.473683	0
Macrophages	T cells	Ccr2	Cd8a	1.0086	1.83975	4.89e-78	0	0.439486	1.41259	0	0	167	167	0.620815	0
Macrophages	T cells	Csf1r	Cd8a	0.451788	1.83975	7.34e-08	0	1.22541	1.41259	0	0	167	167	1.731	0
Macrophages	T cells	Cxcr4	Cd8a	0.557438	1.83975	7.35e-40	0	0.311514	1.41259	0	0	165	165	0.440042	0
Macrophages	T cells	Fcgr2b	Cd8a	0.686643	1.83975	2.31e-12	0	0.521267	1.41259	0	0	467	467	0.736339	0
Macrophages	T cells	Fcgr4	Cd8a	0.697967	1.83975	1.03e-15	0	0.2931	1.41259	0	0	280	280	0.414031	0
Macrophages	T cells	Il2rg	Cd8a	0.171476	1.83975	1	0	0.178527	1.41259	0	0	188	188	0.252186	0
Macrophages	T cells	Itga4	Cd8a	0.557893	1.83975	3.08e-26	0	0.375532	1.41259	0	0	177	177	0.530474	0
Macrophages	T cells	Itgal	Cd8a	0.53885	1.83975	1.67e-22	0	0.276461	1.41259	0	0	297	297	0.390526	0
Macrophages	T cells	Itgam	Cd8a	0.41296	1.83975	0.0195956	0	0.462689	1.41259	0	0	547	547	0.653591	0
Macrophages	T cells	Tnfrsf1a	Cd8a	0.450631	1.83975	0.156678	0	0.564911	1.41259	0	0	195	195	0.797989	0
Macrophages	T cells	Treml4	Cd8a	0.568739	1.83975	3.68e-114	0	0.216429	1.41259	0	0	171	171	0.305727	0
Macrophages	T cells	Adgre1	Cd8b1	0.368601	2.04039	1	0	0.335329	1.57708	0	0	363	363	0.528839	0
Macrophages	T cells	Ccr2	Cd8b1	1.0086	2.04039	4.89e-78	0	0.439486	1.57708	0	0	161	161	0.693104	0
Macrophages	T cells	Csf3r	Cd8b1	0.896755	2.04039	4.28e-08	0	0.574877	1.57708	0	0	175	175	0.906626	0
Macrophages	T cells	Cxcr4	Cd8b1	0.557438	2.04039	7.35e-40	0	0.311514	1.57708	0	0	200	200	0.491281	0
Macrophages	T cells	Fcgr2b	Cd8b1	0.686643	2.04039	2.31e-12	0	0.521267	1.57708	0	0	374	374	0.822079	0
Macrophages	T cells	Fcgr3	Cd8b1	0.576525	2.04039	8.41e-08	0	1.18002	1.57708	0	0	156	156	1.86099	0
Macrophages	T cells	Ifngr1	Cd8b1	0.214181	2.04039	1	0	0.607606	1.57708	0	0	182	182	0.958243	0
Macrophages	T cells	Il2rg	Cd8b1	0.171476	2.04039	1	0	0.178527	1.57708	0	0	174	174	0.281551	0
Macrophages	T cells	Itga4	Cd8b1	0.557893	2.04039	3.08e-26	0	0.375532	1.57708	0	0	170	170	0.592243	0
Macrophages	T cells	Itgal	Cd8b1	0.53885	2.04039	1.67e-22	0	0.276461	1.57708	0	0	218	218	0.436	0
Macrophages	T cells	Itgam	Cd8b1	0.41296	2.04039	0.0195956	0	0.462689	1.57708	0	0	476	476	0.729696	0
Macrophages	T cells	Itgb7	Cd8b1	0.441139	2.04039	8.68e-22	0	0.218728	1.57708	0	0	222	222	0.344951	0
Macrophages	T cells	Cd300a	Crtam	0.869613	0.450056	1.42e-33	3.44e-176	0.608586	0.234432	0	0	235	235	0.142672	0
Macrophages	T cells	Adgre5	Itga4	0.336546	0.946421	0.027127	9.04e-224	0.341486	0.634668	0	0	218	218	0.21673	0
Macrophages	T cells	Clec12a	Itga4	1.05969	0.946421	0	9.04e-224	0.621843	0.634668	0	0	229	229	0.394664	0
Macrophages	T cells	Lair1	Itga4	0.246367	0.946421	1	9.04e-224	0.51171	0.634668	0	0	155	155	0.324766	0
Macrophages	T cells	Lrp1	Itga4	0.144553	0.946421	1	9.04e-224	0.353062	0.634668	0	0	223	223	0.224077	0
Macrophages	T cells	Mrc1	Itga4	0.957335	0.946421	2.66e-104	9.04e-224	0.373312	0.634668	0	0	241	241	0.236929	0
Macrophages	T cells	Notch2	Itga4	0.743779	0.946421	4.19e-05	9.04e-224	0.625217	0.634668	0	0	162	162	0.396805	0
Macrophages	T cells	Plaur	Itga4	0.673505	0.946421	1.53e-08	9.04e-224	0.452801	0.634668	0	0	192	192	0.287378	0
Macrophages	T cells	Tnfrsf13b	Itga4	0.325551	0.946421	2.26e-06	9.04e-224	0.286697	0.634668	0	0	174	174	0.181957	0
Macrophages	T cells	Tnfrsf1a	Itga4	0.450631	0.946421	0.156678	9.04e-224	0.564911	0.634668	0	0	182	182	0.358531	0
Macrophages	T cells	Adgre4	Itgal	0.689037	0.712307	3.17e-145	8.38e-179	0.282027	0.400804	0	0	223	223	0.113038	0
Macrophages	T cells	Adgre5	Itgal	0.336546	0.712307	0.027127	8.38e-179	0.341486	0.400804	0	0	267	267	0.136869	0
Macrophages	T cells	Cd300a	Itgal	0.869613	0.712307	1.42e-33	8.38e-179	0.608586	0.400804	0	0	182	182	0.243924	0
Macrophages	T cells	Fcgr4	Itgal	0.697967	0.712307	1.03e-15	8.38e-179	0.2931	0.400804	0	0	478	478	0.117476	0
Macrophages	T cells	Gpr183	Itgal	0.302188	0.712307	1	8.38e-179	0.193456	0.400804	0	0	165	165	0.0775379	0
Macrophages	T cells	Lrp1	Itgal	0.144553	0.712307	1	8.38e-179	0.353062	0.400804	0	0	208	208	0.141509	0
Macrophages	T cells	Mrc1	Itgal	0.957335	0.712307	2.66e-104	8.38e-179	0.373312	0.400804	0	0	284	284	0.149625	0
Macrophages	T cells	Notch2	Itgal	0.743779	0.712307	4.19e-05	8.38e-179	0.625217	0.400804	0	0	176	176	0.25059	0
Macrophages	T cells	Ptafr	Itgal	0.593498	0.712307	4.62e-09	8.38e-179	0.474388	0.400804	0	0	203	203	0.190137	0
Macrophages	T cells	Ptger4	Itgal	0.285177	0.712307	1.64e-12	8.38e-179	0.182944	0.400804	0	0	197	197	0.0733246	0
Macrophages	T cells	Stab1	Itgal	1.25725	0.712307	1.46e-07	8.38e-179	0.621264	0.400804	0	0	156	156	0.249005	0
Macrophages	T cells	Tlr13	Itgal	0.20735	0.712307	0.030235	8.38e-179	0.149781	0.400804	0	0	204	204	0.0600328	0
Macrophages	T cells	Tnfrsf13b	Itgal	0.325551	0.712307	2.26e-06	8.38e-179	0.286697	0.400804	0	0	206	206	0.114909	0
Macrophages	T cells	Tnfrsf1a	Itgal	0.450631	0.712307	0.156678	8.38e-179	0.564911	0.400804	0	0	233	233	0.226419	0
Macrophages	T cells	Treml4	Itgal	0.568739	0.712307	3.68e-114	8.38e-179	0.216429	0.400804	0	0	269	269	0.0867458	0
Macrophages	T cells	Adgre5	Itgb1	0.336546	0.212652	0.027127	0.683684	0.341486	0.556815	0	0	235	235	0.190145	0
Macrophages	T cells	Lrp1	Itgb1	0.144553	0.212652	1	0.683684	0.353062	0.556815	0	0	503	503	0.19659	0
Macrophages	T cells	Ltb4r1	Itgb1	0.5264	0.212652	4.46e-121	0.683684	0.250228	0.556815	0	0	408	408	0.139331	0
Macrophages	T cells	Mrc1	Itgb1	0.957335	0.212652	2.66e-104	0.683684	0.373312	0.556815	0	0	243	243	0.207866	0
Macrophages	T cells	Notch2	Itgb1	0.743779	0.212652	4.19e-05	0.683684	0.625217	0.556815	0	0	292	292	0.34813	0
Macrophages	T cells	Plaur	Itgb1	0.673505	0.212652	1.53e-08	0.683684	0.452801	0.556815	0	0	498	498	0.252126	0
Macrophages	T cells	Ptpro	Itgb1	0.251239	0.212652	0.0433466	0.683684	0.187011	0.556815	0	0	168	168	0.10413	0
Macrophages	T cells	Rpsa	Itgb1	0.327048	0.212652	1	0.683684	2.08458	0.556815	0	0	177	177	1.16072	0
Macrophages	T cells	Tnfrsf1a	Itgb1	0.450631	0.212652	0.156678	0.683684	0.564911	0.556815	0	0	286	286	0.314551	0
Macrophages	T cells	Adgre4	Itgb2	0.689037	0.358083	3.17e-145	1.11e-06	0.282027	0.411177	0	0	205	205	0.115963	0
Macrophages	T cells	Adgre5	Itgb2	0.336546	0.358083	0.027127	1.11e-06	0.341486	0.411177	0	0	387	387	0.140411	0
Macrophages	T cells	Cd300ld	Itgb2	0.741903	0.358083	5.97e-104	1.11e-06	0.329143	0.411177	0	0	220	220	0.135336	0
Macrophages	T cells	Cd300lf	Itgb2	0.576342	0.358083	1.79e-33	1.11e-06	0.260129	0.411177	0	0	192	192	0.106959	0
Macrophages	T cells	Fcgr4	Itgb2	0.697967	0.358083	1.03e-15	1.11e-06	0.2931	0.411177	0	0	548	548	0.120516	0
Macrophages	T cells	Gpr183	Itgb2	0.302188	0.358083	1	1.11e-06	0.193456	0.411177	0	0	258	258	0.0795445	0
Macrophages	T cells	Ltb4r1	Itgb2	0.5264	0.358083	4.46e-121	1.11e-06	0.250228	0.411177	0	0	391	391	0.102888	0
Macrophages	T cells	Mrc1	Itgb2	0.957335	0.358083	2.66e-104	1.11e-06	0.373312	0.411177	0	0	309	309	0.153497	0
Macrophages	T cells	Notch2	Itgb2	0.743779	0.358083	4.19e-05	1.11e-06	0.625217	0.411177	0	0	169	169	0.257075	0
Macrophages	T cells	P2ry6	Itgb2	0.430669	0.358083	0.0411566	1.11e-06	0.537133	0.411177	0	0	365	365	0.220857	0
Macrophages	T cells	Stab1	Itgb2	1.25725	0.358083	1.46e-07	1.11e-06	0.621264	0.411177	0	0	207	207	0.255449	0
Macrophages	T cells	Tlr13	Itgb2	0.20735	0.358083	0.030235	1.11e-06	0.149781	0.411177	0	0	316	316	0.0615864	0
Macrophages	T cells	Tnfrsf13b	Itgb2	0.325551	0.358083	2.26e-06	1.11e-06	0.286697	0.411177	0	0	237	237	0.117883	0
Macrophages	T cells	Tnfrsf1a	Itgb2	0.450631	0.358083	0.156678	1.11e-06	0.564911	0.411177	0	0	227	227	0.232278	0
Macrophages	T cells	Trem3	Itgb2	0.796053	0.358083	3e-265	1.11e-06	0.395461	0.411177	0	0	155	155	0.162604	0
Macrophages	T cells	Treml4	Itgb2	0.568739	0.358083	3.68e-114	1.11e-06	0.216429	0.411177	0	0	253	253	0.0889907	0
Macrophages	T cells	Vsir	Itgb2	0.48437	0.358083	1.17e-06	1.11e-06	0.863238	0.411177	0	0	215	215	0.354943	0
Macrophages	T cells	Adgre5	Itgb7	0.336546	0.615201	0.027127	2.59e-190	0.341486	0.345574	0	0	210	210	0.118009	0
Macrophages	T cells	Cd300a	Itgb7	0.869613	0.615201	1.42e-33	2.59e-190	0.608586	0.345574	0	0	161	161	0.210311	0
Macrophages	T cells	Tnfrsf13b	Itgb7	0.325551	0.615201	2.26e-06	2.59e-190	0.286697	0.345574	0	0	176	176	0.099075	0
Macrophages	T cells	Adgre4	Klrd1	0.689037	1.07505	3.17e-145	2e-298	0.282027	0.538661	0	0	250	250	0.151917	0
Macrophages	T cells	Cd300a	Klrd1	0.869613	1.07505	1.42e-33	2e-298	0.608586	0.538661	0	0	434	434	0.327821	0
Macrophages	T cells	Cd300lf	Klrd1	0.576342	1.07505	1.79e-33	2e-298	0.260129	0.538661	0	0	339	339	0.140121	0
Macrophages	T cells	Ceacam1	Klrd1	0.238641	1.07505	1	2e-298	0.233371	0.538661	0	0	213	213	0.125708	0
Macrophages	T cells	Clec12a	Klrd1	1.05969	1.07505	0	2e-298	0.621843	0.538661	0	0	257	257	0.334963	0
Macrophages	T cells	Fcgr4	Klrd1	0.697967	1.07505	1.03e-15	2e-298	0.2931	0.538661	0	0	244	244	0.157882	0
Macrophages	T cells	Lair1	Klrd1	0.246367	1.07505	1	2e-298	0.51171	0.538661	0	0	474	474	0.275638	0
Macrophages	T cells	Lrp1	Klrd1	0.144553	1.07505	1	2e-298	0.353062	0.538661	0	0	234	234	0.190181	0
Macrophages	T cells	Mrc1	Klrd1	0.957335	1.07505	2.66e-104	2e-298	0.373312	0.538661	0	0	153	153	0.201089	0
Macrophages	T cells	Treml4	Klrd1	0.568739	1.07505	3.68e-114	2e-298	0.216429	0.538661	0	0	479	479	0.116582	0
Macrophages	T cells	Cd300a	Klrk1	0.869613	1.11257	1.42e-33	1.94e-263	0.608586	0.524609	0	0	281	281	0.31927	0
Macrophages	T cells	Cd300lf	Klrk1	0.576342	1.11257	1.79e-33	1.94e-263	0.260129	0.524609	0	0	181	181	0.136466	0
Macrophages	T cells	Fcgr4	Klrk1	0.697967	1.11257	1.03e-15	1.94e-263	0.2931	0.524609	0	0	307	307	0.153763	0
Macrophages	T cells	Lair1	Klrk1	0.246367	1.11257	1	1.94e-263	0.51171	0.524609	0	0	381	381	0.268448	0
Macrophages	T cells	Treml4	Klrk1	0.568739	1.11257	3.68e-114	1.94e-263	0.216429	0.524609	0	0	282	282	0.113541	0
Microglia	T cells	Itgam	Itgb2	1.10838	0.358083	0	1.11e-06	0.807712	0.411177	503	900	850	991	0.332113	0
Microglia	T cells	Adrb2	Cd3d	1.09752	2.18853	4.25e-281	0	0.862023	1.89805	0	900	58	901	1.63616	0
Microglia	T cells	Adrb2	Cd3g	1.09752	2.51845	4.25e-281	0	0.862023	2.27827	0	900	74	903	1.96392	0
Microglia	T cells	C3ar1	Itgal	0.972895	0.712307	0	8.38e-179	0.641177	0.400804	0	900	286	925	0.256987	0
Microglia	T cells	C3ar1	Itgb2	0.972895	0.358083	0	1.11e-06	0.641177	0.411177	0	900	618	960	0.263637	0
Microglia	T cells	Fcer1g	Itgb2	2.58993	0.358083	0	1.11e-06	3.155	0.411177	0	900	694	968	1.29726	0
Microglia	T cells	Itgam	Itgb1	1.10838	0.212652	0	0.683684	0.807712	0.556815	0	800	794	957	0.449746	0
Microglia	T cells	Itgam	Itgb7	1.10838	0.615201	0	2.59e-190	0.807712	0.345574	0	360	484	655	0.279124	0
Microglia	T cells	Itgax	Itgb1	0.320649	0.212652	1.53e-121	0.683684	0.179606	0.556815	0	900	590	957	0.100007	0
Microglia	T cells	Itgax	Itgb2	0.320649	0.358083	1.53e-121	1.11e-06	0.179606	0.411177	0	900	920	991	0.0738499	0
Microglia	T cells	Itgax	Itgb7	0.320649	0.615201	1.53e-121	2.59e-190	0.179606	0.345574	0	360	514	676	0.0620672	0
Microglia	T cells	Itgb2	Itgb7	0.914482	0.615201	0	2.59e-190	0.712228	0.345574	0	720	254	782	0.246128	0
Microglia	T cells	Itgb5	Itgb7	1.71183	0.615201	0	2.59e-190	1.86716	0.345574	0	720	75	730	0.645241	0
Microglia	T cells	Adgre1	Itga4	0.900775	0.946421	0	9.04e-224	0.62517	0.634668	0	0	418	418	0.396775	0
Microglia	T cells	Adgre1	Itgal	0.900775	0.712307	0	8.38e-179	0.62517	0.400804	0	0	522	522	0.250571	0
Microglia	T cells	Adgre1	Itgb1	0.900775	0.212652	0	0.683684	0.62517	0.556815	0	0	364	364	0.348104	0
Microglia	T cells	Adgre1	Itgb2	0.900775	0.358083	0	1.11e-06	0.62517	0.411177	0	0	712	712	0.257055	0
Microglia	T cells	Adgre1	Klrd1	0.900775	1.07505	0	2e-298	0.62517	0.538661	0	0	218	218	0.336755	0
Microglia	T cells	Adgre1	Klrk1	0.900775	1.11257	0	1.94e-263	0.62517	0.524609	0	0	421	421	0.32797	0
Microglia	T cells	Adora3	Itgb2	0.513365	0.358083	4.83e-191	1.11e-06	0.28621	0.411177	0	0	185	185	0.117683	0
Microglia	T cells	Adrb2	B2m	1.09752	0.464139	4.25e-281	1.59e-27	0.862023	3.55004	0	0	153	153	3.06021	0
Microglia	T cells	C3ar1	Itgb1	0.972895	0.212652	0	0.683684	0.641177	0.556815	0	0	183	183	0.357017	0
Microglia	T cells	C5ar1	Itgal	0.49954	0.712307	1.37e-164	8.38e-179	0.297379	0.400804	0	0	446	446	0.119191	0
Microglia	T cells	C5ar1	Itgb1	0.49954	0.212652	1.37e-164	0.683684	0.297379	0.556815	0	0	157	157	0.165585	0
Microglia	T cells	C5ar1	Itgb2	0.49954	0.358083	1.37e-164	1.11e-06	0.297379	0.411177	0	0	590	590	0.122275	0
Microglia	T cells	Ccr5	Cd160	0.787015	0.558399	1.02e-259	3.65e-208	0.521245	0.27683	0	0	232	232	0.144296	0
Microglia	T cells	Ccr5	Crtam	0.787015	0.450056	1.02e-259	3.44e-176	0.521245	0.234432	0	0	152	152	0.122197	0
Microglia	T cells	Ccr5	Itga4	0.787015	0.946421	1.02e-259	9.04e-224	0.521245	0.634668	0	0	489	489	0.330817	0
Microglia	T cells	Ccr5	Itgal	0.787015	0.712307	1.02e-259	8.38e-179	0.521245	0.400804	0	0	553	553	0.208917	0
Microglia	T cells	Ccr5	Itgb1	0.787015	0.212652	1.02e-259	0.683684	0.521245	0.556815	0	0	378	378	0.290237	0
Microglia	T cells	Ccr5	Itgb2	0.787015	0.358083	1.02e-259	1.11e-06	0.521245	0.411177	0	0	512	512	0.214324	0
Microglia	T cells	Ccr5	Itgb7	0.787015	0.615201	1.02e-259	2.59e-190	0.521245	0.345574	0	0	204	204	0.180129	0
Microglia	T cells	Ccr5	Klrd1	0.787015	1.07505	1.02e-259	2e-298	0.521245	0.538661	0	0	438	438	0.280774	0
Microglia	T cells	Ccr5	Klrk1	0.787015	1.11257	1.02e-259	1.94e-263	0.521245	0.524609	0	0	513	513	0.27345	0
Microglia	T cells	Cd84	Cd8a	1.41512	1.83975	0	0	1.13359	1.41259	0	0	155	155	1.6013	0
Microglia	T cells	Cd84	Crtam	1.41512	0.450056	0	3.44e-176	1.13359	0.234432	0	0	330	330	0.26575	0
Microglia	T cells	Cd84	Itga4	1.41512	0.946421	0	9.04e-224	1.13359	0.634668	0	0	199	199	0.719451	0
Microglia	T cells	Cd84	Itgal	1.41512	0.712307	0	8.38e-179	1.13359	0.400804	0	0	314	314	0.454346	0
Microglia	T cells	Cd84	Itgb2	1.41512	0.358083	0	1.11e-06	1.13359	0.411177	0	0	487	487	0.466105	0
Microglia	T cells	Cd84	Itgb7	1.41512	0.615201	0	2.59e-190	1.13359	0.345574	0	0	155	155	0.391738	0
Microglia	T cells	Cd84	Klrd1	1.41512	1.07505	0	2e-298	1.13359	0.538661	0	0	242	242	0.610619	0
Microglia	T cells	Cd84	Klrk1	1.41512	1.11257	0	1.94e-263	1.13359	0.524609	0	0	283	283	0.59469	0
Microglia	T cells	Cd86	Cd160	0.80036	0.558399	0	3.65e-208	0.538719	0.27683	0	0	376	376	0.149134	0
Microglia	T cells	Cd86	Cd8a	0.80036	1.83975	0	0	0.538719	1.41259	0	0	381	381	0.760991	0
Microglia	T cells	Cd86	Cd8b1	0.80036	2.04039	0	0	0.538719	1.57708	0	0	316	316	0.849602	0
Microglia	T cells	Cd86	Clec2i	0.80036	0.603355	0	2.92e-203	0.538719	0.344838	0	0	193	193	0.185771	0
Microglia	T cells	Cd86	Crtam	0.80036	0.450056	0	3.44e-176	0.538719	0.234432	0	0	177	177	0.126293	0
Microglia	T cells	Cd86	Itga4	0.80036	0.946421	0	9.04e-224	0.538719	0.634668	0	0	463	463	0.341907	0
Microglia	T cells	Cd86	Itgal	0.80036	0.712307	0	8.38e-179	0.538719	0.400804	0	0	732	732	0.215921	0
Microglia	T cells	Cd86	Itgb1	0.80036	0.212652	0	0.683684	0.538719	0.556815	0	0	484	484	0.299967	0
Microglia	T cells	Cd86	Itgb2	0.80036	0.358083	0	1.11e-06	0.538719	0.411177	0	0	548	548	0.221509	0
Microglia	T cells	Cd86	Itgb7	0.80036	0.615201	0	2.59e-190	0.538719	0.345574	0	0	240	240	0.186167	0
Microglia	T cells	Cd86	Klrd1	0.80036	1.07505	0	2e-298	0.538719	0.538661	0	0	498	498	0.290187	0
Microglia	T cells	Cd86	Klrk1	0.80036	1.11257	0	1.94e-263	0.538719	0.524609	0	0	631	631	0.282617	0
Microglia	T cells	Cmklr1	Itgb2	0.53585	0.358083	1.08e-218	1.11e-06	0.32422	0.411177	0	0	184	184	0.133312	0
Microglia	T cells	Cmklr1	Klrd1	0.53585	1.07505	1.08e-218	2e-298	0.32422	0.538661	0	0	209	209	0.174645	0
Microglia	T cells	Cmklr1	Klrk1	0.53585	1.11257	1.08e-218	1.94e-263	0.32422	0.524609	0	0	220	220	0.170089	0
Microglia	T cells	Csf1r	Itga4	2.35574	0.946421	0	9.04e-224	2.27991	0.634668	0	0	329	329	1.44698	0
Microglia	T cells	Csf1r	Itgal	2.35574	0.712307	0	8.38e-179	2.27991	0.400804	0	0	379	379	0.913797	0
Microglia	T cells	Csf1r	Itgb1	2.35574	0.212652	0	0.683684	2.27991	0.556815	0	0	338	338	1.26949	0
Microglia	T cells	Csf1r	Itgb2	2.35574	0.358083	0	1.11e-06	2.27991	0.411177	0	0	777	777	0.937446	0
Microglia	T cells	Csf1r	Itgb7	2.35574	0.615201	0	2.59e-190	2.27991	0.345574	0	0	228	228	0.787877	0
Microglia	T cells	Csf1r	Klrd1	2.35574	1.07505	0	2e-298	2.27991	0.538661	0	0	167	167	1.2281	0
Microglia	T cells	Csf1r	Klrk1	2.35574	1.11257	0	1.94e-263	2.27991	0.524609	0	0	246	246	1.19606	0
Microglia	T cells	Csf2ra	Itgal	0.72658	0.712307	2.17e-235	8.38e-179	0.618701	0.400804	0	0	167	167	0.247978	0
Microglia	T cells	Csf2ra	Itgb1	0.72658	0.212652	2.17e-235	0.683684	0.618701	0.556815	0	0	201	201	0.344502	0
Microglia	T cells	Csf2ra	Itgb2	0.72658	0.358083	2.17e-235	1.11e-06	0.618701	0.411177	0	0	307	307	0.254395	0
Microglia	T cells	Csf2ra	Klrd1	0.72658	1.07505	2.17e-235	2e-298	0.618701	0.538661	0	0	188	188	0.33327	0
Microglia	T cells	Csf3r	Itgal	0.79869	0.712307	0	8.38e-179	0.576699	0.400804	0	0	194	194	0.231143	0
Microglia	T cells	Csf3r	Itgb2	0.79869	0.358083	0	1.11e-06	0.576699	0.411177	0	0	280	280	0.237125	0
Microglia	T cells	Cx3cr1	Cd160	2.38187	0.558399	0	3.65e-208	2.2583	0.27683	0	0	198	198	0.625167	0
Microglia	T cells	Cx3cr1	Itga4	2.38187	0.946421	0	9.04e-224	2.2583	0.634668	0	0	434	434	1.43327	0
Microglia	T cells	Cx3cr1	Itgal	2.38187	0.712307	0	8.38e-179	2.2583	0.400804	0	0	463	463	0.905138	0
Microglia	T cells	Cx3cr1	Itgb1	2.38187	0.212652	0	0.683684	2.2583	0.556815	0	0	296	296	1.25746	0
Microglia	T cells	Cx3cr1	Itgb2	2.38187	0.358083	0	1.11e-06	2.2583	0.411177	0	0	369	369	0.928562	0
Microglia	T cells	Cx3cr1	Itgb7	2.38187	0.615201	0	2.59e-190	2.2583	0.345574	0	0	239	239	0.780411	0
Microglia	T cells	Cx3cr1	Klrd1	2.38187	1.07505	0	2e-298	2.2583	0.538661	0	0	285	285	1.21646	0
Microglia	T cells	Cx3cr1	Klrk1	2.38187	1.11257	0	1.94e-263	2.2583	0.524609	0	0	405	405	1.18473	0
Microglia	T cells	Fcer1g	Itga4	2.58993	0.946421	0	9.04e-224	3.155	0.634668	0	0	178	178	2.00238	0
Microglia	T cells	Fcer1g	Itgal	2.58993	0.712307	0	8.38e-179	3.155	0.400804	0	0	399	399	1.26454	0
Microglia	T cells	Fcer1g	Itgb1	2.58993	0.212652	0	0.683684	3.155	0.556815	0	0	226	226	1.75675	0
Microglia	T cells	Fcer1g	Itgb7	2.58993	0.615201	0	2.59e-190	3.155	0.345574	0	0	246	246	1.09029	0
Microglia	T cells	Fcer1g	Klrd1	2.58993	1.07505	0	2e-298	3.155	0.538661	0	0	267	267	1.69947	0
Microglia	T cells	Fcer1g	Klrk1	2.58993	1.11257	0	1.94e-263	3.155	0.524609	0	0	283	283	1.65514	0
Microglia	T cells	Fcgr1	Itga4	1.09341	0.946421	0	9.04e-224	0.766568	0.634668	0	0	211	211	0.486516	0
Microglia	T cells	Fcgr1	Itgal	1.09341	0.712307	0	8.38e-179	0.766568	0.400804	0	0	536	536	0.307244	0
Microglia	T cells	Fcgr1	Itgb1	1.09341	0.212652	0	0.683684	0.766568	0.556815	0	0	208	208	0.426836	0
Microglia	T cells	Fcgr1	Itgb2	1.09341	0.358083	0	1.11e-06	0.766568	0.411177	0	0	559	559	0.315195	0
Microglia	T cells	Fcgr1	Itgb7	1.09341	0.615201	0	2.59e-190	0.766568	0.345574	0	0	187	187	0.264906	0
Microglia	T cells	Fcgr1	Klrk1	1.09341	1.11257	0	1.94e-263	0.766568	0.524609	0	0	265	265	0.402149	0
Microglia	T cells	Fcgr2b	Itga4	0.762826	0.946421	0	9.04e-224	0.516048	0.634668	0	0	469	469	0.327519	0
Microglia	T cells	Fcgr2b	Itgal	0.762826	0.712307	0	8.38e-179	0.516048	0.400804	0	0	541	541	0.206834	0
Microglia	T cells	Fcgr2b	Itgb1	0.762826	0.212652	0	0.683684	0.516048	0.556815	0	0	305	305	0.287343	0
Microglia	T cells	Fcgr2b	Itgb2	0.762826	0.358083	0	1.11e-06	0.516048	0.411177	0	0	558	558	0.212187	0
Microglia	T cells	Fcgr2b	Klrd1	0.762826	1.07505	0	2e-298	0.516048	0.538661	0	0	293	293	0.277975	0
Microglia	T cells	Fcgr2b	Klrk1	0.762826	1.11257	0	1.94e-263	0.516048	0.524609	0	0	453	453	0.270724	0
Microglia	T cells	Fcgr3	Itga4	2.22822	0.946421	0	9.04e-224	2.15977	0.634668	0	0	252	252	1.37074	0
Microglia	T cells	Fcgr3	Itgal	2.22822	0.712307	0	8.38e-179	2.15977	0.400804	0	0	406	406	0.865645	0
Microglia	T cells	Fcgr3	Itgb1	2.22822	0.212652	0	0.683684	2.15977	0.556815	0	0	216	216	1.20259	0
Microglia	T cells	Fcgr3	Itgb2	2.22822	0.358083	0	1.11e-06	2.15977	0.411177	0	0	487	487	0.888047	0
Microglia	T cells	Fcgr3	Klrd1	2.22822	1.07505	0	2e-298	2.15977	0.538661	0	0	173	173	1.16338	0
Microglia	T cells	Fcgr3	Klrk1	2.22822	1.11257	0	1.94e-263	2.15977	0.524609	0	0	263	263	1.13304	0
Microglia	T cells	Gpr65	Crtam	0.400605	0.450056	3.25e-123	3.44e-176	0.265015	0.234432	0	0	290	290	0.0621281	0
Microglia	T cells	Gpr65	Itgal	0.400605	0.712307	3.25e-123	8.38e-179	0.265015	0.400804	0	0	413	413	0.106219	0
Microglia	T cells	Gpr65	Itgb2	0.400605	0.358083	3.25e-123	1.11e-06	0.265015	0.411177	0	0	474	474	0.108968	0
Microglia	T cells	Gpr65	Itgb7	0.400605	0.615201	3.25e-123	2.59e-190	0.265015	0.345574	0	0	181	181	0.0915822	0
Microglia	T cells	Gpr65	Klrd1	0.400605	1.07505	3.25e-123	2e-298	0.265015	0.538661	0	0	273	273	0.142753	0
Microglia	T cells	Ifnar2	Itgb2	0.31753	0.358083	5.04e-64	1.11e-06	0.770686	0.411177	0	0	163	163	0.316888	0
Microglia	T cells	Ifngr1	Itgal	1.0074	0.712307	7.75e-287	8.38e-179	1.06692	0.400804	0	0	167	167	0.427626	0
Microglia	T cells	Ifngr1	Itgb1	1.0074	0.212652	7.75e-287	0.683684	1.06692	0.556815	0	0	159	159	0.594077	0
Microglia	T cells	Ifngr1	Klrk1	1.0074	1.11257	7.75e-287	1.94e-263	1.06692	0.524609	0	0	179	179	0.559716	0
Microglia	T cells	Il10ra	Itga4	0.753104	0.946421	7.41e-286	9.04e-224	0.499908	0.634668	0	0	212	212	0.317275	0
Microglia	T cells	Il10ra	Itgal	0.753104	0.712307	7.41e-286	8.38e-179	0.499908	0.400804	0	0	556	556	0.200365	0
Microglia	T cells	Il10ra	Itgb2	0.753104	0.358083	7.41e-286	1.11e-06	0.499908	0.411177	0	0	525	525	0.20555	0
Microglia	T cells	Il10ra	Itgb7	0.753104	0.615201	7.41e-286	2.59e-190	0.499908	0.345574	0	0	202	202	0.172755	0
Microglia	T cells	Il10ra	Klrd1	0.753104	1.07505	7.41e-286	2e-298	0.499908	0.538661	0	0	311	311	0.269281	0
Microglia	T cells	Il10ra	Klrk1	0.753104	1.11257	7.41e-286	1.94e-263	0.499908	0.524609	0	0	218	218	0.262256	0
Microglia	T cells	Il10rb	Itgb2	0.395573	0.358083	3.15e-107	1.11e-06	0.781758	0.411177	0	0	289	289	0.321441	0
Microglia	T cells	Il11ra1	Itgb2	0.115731	0.358083	1.77e-22	1.11e-06	0.286109	0.411177	0	0	182	182	0.117641	0
Microglia	T cells	Il13ra1	Itgb1	0.240098	0.212652	2.9e-57	0.683684	0.2382	0.556815	0	0	170	170	0.132633	0
Microglia	T cells	Il17ra	Itgal	0.382943	0.712307	3.72e-88	8.38e-179	0.276227	0.400804	0	0	173	173	0.110713	0
Microglia	T cells	Il17ra	Itgb2	0.382943	0.358083	3.72e-88	1.11e-06	0.276227	0.411177	0	0	201	201	0.113578	0
Microglia	T cells	Il4ra	Itga4	0.324837	0.946421	2.47e-85	9.04e-224	0.246051	0.634668	0	0	253	253	0.156161	0
Microglia	T cells	Il4ra	Itgal	0.324837	0.712307	2.47e-85	8.38e-179	0.246051	0.400804	0	0	204	204	0.0986182	0
Microglia	T cells	Il4ra	Itgb1	0.324837	0.212652	2.47e-85	0.683684	0.246051	0.556815	0	0	222	222	0.137005	0
Microglia	T cells	Il4ra	Itgb2	0.324837	0.358083	2.47e-85	1.11e-06	0.246051	0.411177	0	0	263	263	0.10117	0
Microglia	T cells	Il4ra	Klrd1	0.324837	1.07505	2.47e-85	2e-298	0.246051	0.538661	0	0	170	170	0.132538	0
Microglia	T cells	Il4ra	Klrk1	0.324837	1.11257	2.47e-85	1.94e-263	0.246051	0.524609	0	0	165	165	0.129081	0
Microglia	T cells	Il6ra	Itga4	0.535676	0.946421	3.58e-160	9.04e-224	0.447431	0.634668	0	0	247	247	0.28397	0
Microglia	T cells	Il6ra	Itgal	0.535676	0.712307	3.58e-160	8.38e-179	0.447431	0.400804	0	0	261	261	0.179332	0
Microglia	T cells	Il6ra	Itgb1	0.535676	0.212652	3.58e-160	0.683684	0.447431	0.556815	0	0	170	170	0.249136	0
Microglia	T cells	Il6ra	Itgb2	0.535676	0.358083	3.58e-160	1.11e-06	0.447431	0.411177	0	0	206	206	0.183973	0
Microglia	T cells	Il6ra	Klrk1	0.535676	1.11257	3.58e-160	1.94e-263	0.447431	0.524609	0	0	165	165	0.234726	0
Microglia	T cells	Il6st	Itgb1	0.154211	0.212652	8.29e-21	0.683684	0.269158	0.556815	0	0	223	223	0.149871	0
Microglia	T cells	Il6st	Itgb2	0.154211	0.358083	8.29e-21	1.11e-06	0.269158	0.411177	0	0	175	175	0.110671	0
Microglia	T cells	Il6st	Itgb7	0.154211	0.615201	8.29e-21	2.59e-190	0.269158	0.345574	0	0	188	188	0.0930138	0
Microglia	T cells	Il6st	Klrk1	0.154211	1.11257	8.29e-21	1.94e-263	0.269158	0.524609	0	0	178	178	0.141203	0
Microglia	T cells	Itgam	Cd160	1.10838	0.558399	0	3.65e-208	0.807712	0.27683	0	0	285	285	0.223599	0
Microglia	T cells	Itgam	Klrd1	1.10838	1.07505	0	2e-298	0.807712	0.538661	0	0	447	447	0.435083	0
Microglia	T cells	Itgam	Klrk1	1.10838	1.11257	0	1.94e-263	0.807712	0.524609	0	0	636	636	0.423733	0
Microglia	T cells	Itgax	Cd160	0.320649	0.558399	1.53e-121	3.65e-208	0.179606	0.27683	0	0	234	234	0.0497205	0
Microglia	T cells	Itgax	Crtam	0.320649	0.450056	1.53e-121	3.44e-176	0.179606	0.234432	0	0	217	217	0.0421055	0
Microglia	T cells	Itgax	Klrd1	0.320649	1.07505	1.53e-121	2e-298	0.179606	0.538661	0	0	476	476	0.0967468	0
Microglia	T cells	Itgax	Klrk1	0.320649	1.11257	1.53e-121	1.94e-263	0.179606	0.524609	0	0	567	567	0.094223	0
Microglia	T cells	Itgb2	Klrd1	0.914482	1.07505	0	2e-298	0.712228	0.538661	0	0	260	260	0.38365	0
Microglia	T cells	Itgb2	Klrk1	0.914482	1.11257	0	1.94e-263	0.712228	0.524609	0	0	379	379	0.373642	0
Microglia	T cells	Lair1	Cd160	1.57154	0.558399	0	3.65e-208	1.34635	0.27683	0	0	221	221	0.372712	0
Microglia	T cells	Lair1	Crtam	1.57154	0.450056	0	3.44e-176	1.34635	0.234432	0	0	253	253	0.315629	0
Microglia	T cells	Lilrb4a	Cd160	0.480216	0.558399	9.68e-105	3.65e-208	0.260723	0.27683	0	0	529	529	0.0721762	0
Microglia	T cells	Lilrb4a	Itgal	0.480216	0.712307	9.68e-105	8.38e-179	0.260723	0.400804	0	0	203	203	0.104499	0
Microglia	T cells	Lilrb4a	Itgb2	0.480216	0.358083	9.68e-105	1.11e-06	0.260723	0.411177	0	0	652	652	0.107203	0
Microglia	T cells	Lilrb4a	Klrd1	0.480216	1.07505	9.68e-105	2e-298	0.260723	0.538661	0	0	289	289	0.140442	0
Microglia	T cells	Lilrb4a	Klrk1	0.480216	1.11257	9.68e-105	1.94e-263	0.260723	0.524609	0	0	199	199	0.136778	0
Microglia	T cells	Lpar6	Clec2i	0.284443	0.603355	5.13e-59	2.92e-203	0.490846	0.344838	0	0	153	153	0.169262	0
Microglia	T cells	Ltbr	Cd160	0.143605	0.558399	1.5e-27	3.65e-208	0.188611	0.27683	0	0	260	260	0.0522132	0
Microglia	T cells	P2rx7	Crtam	0.243936	0.450056	3.87e-48	3.44e-176	0.224149	0.234432	0	0	510	510	0.0525477	0
Microglia	T cells	Slamf6	Cd160	0.245241	0.558399	2.49e-101	3.65e-208	0.135706	0.27683	0	0	208	208	0.0375675	0
Microglia	T cells	Slamf6	Clec2i	0.245241	0.603355	2.49e-101	2.92e-203	0.135706	0.344838	0	0	153	153	0.0467965	0
Microglia	T cells	Slamf6	Crtam	0.245241	0.450056	2.49e-101	3.44e-176	0.135706	0.234432	0	0	362	362	0.0318138	0
Microglia	T cells	Tlr2	Klrk1	0.67404	1.11257	1.12e-219	1.94e-263	0.376801	0.524609	0	0	460	460	0.197673	0
Microglia	T cells	Tnfrsf1a	Cd160	0.290679	0.558399	5.47e-70	3.65e-208	0.487201	0.27683	0	0	470	470	0.134872	0
Microglia	T cells	Tnfrsf1a	Klrk1	0.290679	1.11257	5.47e-70	1.94e-263	0.487201	0.524609	0	0	252	252	0.25559	0
Microglia	T cells	Fcer1g	Cd247	2.58993	0.776987	0	0	3.155	0.439521	493	0	156	554	1.38669	0
Microglia	T cells	Itgb2	Itgal	0.914482	0.712307	0	8.38e-179	0.712228	0.400804	538	900	942	997	0.285464	0
Microglia	T cells	Trem2	B2m	2.79904	0.464139	0	1.59e-27	3.07494	3.55004	0	900	151	911	10.9162	0
Microglia	T cells	Fcgr1	Cd247	1.09341	0.776987	0	0	0.766568	0.439521	0	900	243	921	0.336923	0
Microglia	T cells	Fcgr2b	Cd247	0.762826	0.776987	0	0	0.516048	0.439521	0	900	276	924	0.226814	0
Microglia	T cells	Fcgr3	Cd247	2.22822	0.776987	0	0	2.15977	0.439521	0	900	383	935	0.949264	0
Microglia	T cells	Fcgr1	Cd3g	1.09341	2.51845	0	0	0.766568	2.27827	0	900	104	906	1.74645	0
Microglia	T cells	Fcgr2b	Cd3g	0.762826	2.51845	0	0	0.516048	2.27827	0	900	306	927	1.1757	0
Microglia	T cells	Fcgr3	Cd3g	2.22822	2.51845	0	0	2.15977	2.27827	0	900	459	943	4.92054	0
Microglia	T cells	Itgam	Itga4	1.10838	0.946421	0	9.04e-224	0.807712	0.634668	0	360	325	549	0.512629	0
Microglia	T cells	Itgax	Itga4	0.320649	0.946421	1.53e-121	9.04e-224	0.179606	0.634668	0	360	262	507	0.11399	0
Microglia	T cells	Itgb2	Itga4	0.914482	0.946421	0	9.04e-224	0.712228	0.634668	0	720	839	953	0.452028	0
Microglia	T cells	Itgb5	Itga4	1.71183	0.946421	0	9.04e-224	1.86716	0.634668	0	800	664	929	1.18502	0
Microglia	T cells	Itgam	Itgal	1.10838	0.712307	0	8.38e-179	0.807712	0.400804	0	900	269	923	0.323735	0
Microglia	T cells	Itgax	Itgal	0.320649	0.712307	1.53e-121	8.38e-179	0.179606	0.400804	0	360	328	552	0.0719869	0
Microglia	T cells	Itgb5	Itgal	1.71183	0.712307	0	8.38e-179	1.86716	0.400804	0	720	468	844	0.748365	0
Microglia	T cells	Lair1	Itgal	1.57154	0.712307	0	8.38e-179	1.34635	0.400804	0	900	224	919	0.539624	0
Microglia	T cells	Itgb2	Itgb1	0.914482	0.212652	0	0.683684	0.712228	0.556815	0	800	98	812	0.396579	0
Microglia	T cells	Itgb5	Itgb1	1.71183	0.212652	0	0.683684	1.86716	0.556815	0	720	142	749	1.03966	0
Microglia	T cells	Cd300a	Itgb2	0.466738	0.358083	1.76e-175	1.11e-06	0.298781	0.411177	0	900	398	937	0.122852	0
Microglia	T cells	Itgb5	Itgb2	1.71183	0.358083	0	1.11e-06	1.86716	0.411177	0	720	94	735	0.767732	0
Microglia	T cells	Lair1	Itgb2	1.57154	0.358083	0	1.11e-06	1.34635	0.411177	0	900	416	939	0.553589	0
Microglia	T cells	Ptafr	Itgb2	0.85409	0.358083	0	1.11e-06	0.535133	0.411177	0	900	251	921	0.220034	0
Microglia	T cells	Trem2	Klrd1	2.79904	1.07505	0	2e-298	3.07494	0.538661	0	900	192	915	1.65635	0
Microglia	T cells	Trem2	Klrk1	2.79904	1.11257	0	1.94e-263	3.07494	0.524609	0	900	138	910	1.61314	0
Microglia	T cells	Adgre1	B2m	0.900775	0.464139	0	1.59e-27	0.62517	3.55004	0	0	287	287	2.21938	0
Microglia	T cells	Axl	B2m	0.609132	0.464139	8.89e-186	1.59e-27	0.536099	3.55004	0	0	186	186	1.90317	0
Microglia	T cells	Ccr5	B2m	0.787015	0.464139	1.02e-259	1.59e-27	0.521245	3.55004	0	0	264	264	1.85044	0
Microglia	T cells	Ccrl2	B2m	0.726897	0.464139	7.44e-139	1.59e-27	0.480314	3.55004	0	0	209	209	1.70513	0
Microglia	T cells	Cd180	B2m	1.05709	0.464139	0	1.59e-27	0.744962	3.55004	0	0	162	162	2.64464	0
Microglia	T cells	Cd84	B2m	1.41512	0.464139	0	1.59e-27	1.13359	3.55004	0	0	150	150	4.02428	0
Microglia	T cells	Cd86	B2m	0.80036	0.464139	0	1.59e-27	0.538719	3.55004	0	0	375	375	1.91247	0
Microglia	T cells	Csf1r	B2m	2.35574	0.464139	0	1.59e-27	2.27991	3.55004	0	0	257	257	8.09376	0
Microglia	T cells	Csf3r	B2m	0.79869	0.464139	0	1.59e-27	0.576699	3.55004	0	0	150	150	2.0473	0
Microglia	T cells	Cx3cr1	B2m	2.38187	0.464139	0	1.59e-27	2.2583	3.55004	0	0	197	197	8.01706	0
Microglia	T cells	Fcer1g	B2m	2.58993	0.464139	0	1.59e-27	3.155	3.55004	0	0	278	278	11.2004	0
Microglia	T cells	Fcgr1	B2m	1.09341	0.464139	0	1.59e-27	0.766568	3.55004	0	0	178	178	2.72134	0
Microglia	T cells	Fcgr2b	B2m	0.762826	0.464139	0	1.59e-27	0.516048	3.55004	0	0	288	288	1.83199	0
Microglia	T cells	Fcgr3	B2m	2.22822	0.464139	0	1.59e-27	2.15977	3.55004	0	0	159	159	7.66726	0
Microglia	T cells	Ifngr1	B2m	1.0074	0.464139	7.75e-287	1.59e-27	1.06692	3.55004	0	0	253	253	3.7876	0
Microglia	T cells	Il10ra	B2m	0.753104	0.464139	7.41e-286	1.59e-27	0.499908	3.55004	0	0	223	223	1.77469	0
Microglia	T cells	Il10rb	B2m	0.395573	0.464139	3.15e-107	1.59e-27	0.781758	3.55004	0	0	218	218	2.77527	0
Microglia	T cells	Il13ra1	B2m	0.240098	0.464139	2.9e-57	1.59e-27	0.2382	3.55004	0	0	171	171	0.845618	0
Microglia	T cells	Il4ra	B2m	0.324837	0.464139	2.47e-85	1.59e-27	0.246051	3.55004	0	0	227	227	0.87349	0
Microglia	T cells	Il6ra	B2m	0.535676	0.464139	3.58e-160	1.59e-27	0.447431	3.55004	0	0	215	215	1.5884	0
Microglia	T cells	Il6st	B2m	0.154211	0.464139	8.29e-21	1.59e-27	0.269158	3.55004	0	0	176	176	0.955519	0
Microglia	T cells	Itgam	B2m	1.10838	0.464139	0	1.59e-27	0.807712	3.55004	0	0	355	355	2.86741	0
Microglia	T cells	Itgax	B2m	0.320649	0.464139	1.53e-121	1.59e-27	0.179606	3.55004	0	0	321	321	0.637609	0
Microglia	T cells	Itgb2	B2m	0.914482	0.464139	0	1.59e-27	0.712228	3.55004	0	0	352	352	2.52844	0
Microglia	T cells	Lilrb4a	B2m	0.480216	0.464139	9.68e-105	1.59e-27	0.260723	3.55004	0	0	296	296	0.925578	0
Microglia	T cells	Notch2	B2m	0.336838	0.464139	8.08e-64	1.59e-27	0.410606	3.55004	0	0	188	188	1.45766	0
Microglia	T cells	Slamf6	B2m	0.245241	0.464139	2.49e-101	1.59e-27	0.135706	3.55004	0	0	152	152	0.481761	0
Microglia	T cells	Tgfbr1	B2m	1.65338	0.464139	0	1.59e-27	1.5185	3.55004	0	0	169	169	5.39073	0
Microglia	T cells	Tgfbr2	B2m	0.426765	0.464139	3.66e-103	1.59e-27	0.515299	3.55004	0	0	222	222	1.82933	0
Microglia	T cells	Tlr2	B2m	0.67404	0.464139	1.12e-219	1.59e-27	0.376801	3.55004	0	0	329	329	1.33766	0
Microglia	T cells	Tlr7	B2m	0.373398	0.464139	5.15e-151	1.59e-27	0.22196	3.55004	0	0	288	288	0.787967	0
Microglia	T cells	Tnfrsf1a	B2m	0.290679	0.464139	5.47e-70	1.59e-27	0.487201	3.55004	0	0	297	297	1.72958	0
Microglia	T cells	Tnfrsf21	Cd160	0.530331	0.558399	3.83e-195	3.65e-208	0.470271	0.27683	0	0	171	171	0.130185	0
Microglia	T cells	Vsir	Cd160	1.58757	0.558399	0	3.65e-208	1.46011	0.27683	0	0	323	323	0.404203	0
Microglia	T cells	Axl	Cd247	0.609132	0.776987	8.89e-186	0	0.536099	0.439521	0	0	213	213	0.235627	0
Microglia	T cells	Ccr5	Cd247	0.787015	0.776987	1.02e-259	0	0.521245	0.439521	0	0	213	213	0.229098	0
Microglia	T cells	Cd180	Cd247	1.05709	0.776987	0	0	0.744962	0.439521	0	0	236	236	0.327427	0
Microglia	T cells	Cd300a	Cd247	0.466738	0.776987	1.76e-175	0	0.298781	0.439521	0	0	317	317	0.13132	0
Microglia	T cells	Cd84	Cd247	1.41512	0.776987	0	0	1.13359	0.439521	0	0	257	257	0.498235	0
Microglia	T cells	Cd86	Cd247	0.80036	0.776987	0	0	0.538719	0.439521	0	0	325	325	0.236778	0
Microglia	T cells	Csf1r	Cd247	2.35574	0.776987	0	0	2.27991	0.439521	0	0	169	169	1.00207	0
Microglia	T cells	Csf2ra	Cd247	0.72658	0.776987	2.17e-235	0	0.618701	0.439521	0	0	191	191	0.271932	0
Microglia	T cells	Il10ra	Cd247	0.753104	0.776987	7.41e-286	0	0.499908	0.439521	0	0	156	156	0.21972	0
Microglia	T cells	Il17ra	Cd247	0.382943	0.776987	3.72e-88	0	0.276227	0.439521	0	0	287	287	0.121408	0
Microglia	T cells	Il4ra	Cd247	0.324837	0.776987	2.47e-85	0	0.246051	0.439521	0	0	174	174	0.108145	0
Microglia	T cells	Il6ra	Cd247	0.535676	0.776987	3.58e-160	0	0.447431	0.439521	0	0	167	167	0.196655	0
Microglia	T cells	Itgam	Cd247	1.10838	0.776987	0	0	0.807712	0.439521	0	0	329	329	0.355007	0
Microglia	T cells	Itgax	Cd247	0.320649	0.776987	1.53e-121	0	0.179606	0.439521	0	0	178	178	0.0789407	0
Microglia	T cells	Itgb2	Cd247	0.914482	0.776987	0	0	0.712228	0.439521	0	0	209	209	0.313039	0
Microglia	T cells	Itgb5	Cd247	1.71183	0.776987	0	0	1.86716	0.439521	0	0	195	195	0.820655	0
Microglia	T cells	Lair1	Cd247	1.57154	0.776987	0	0	1.34635	0.439521	0	0	184	184	0.59175	0
Microglia	T cells	Lilrb4a	Cd247	0.480216	0.776987	9.68e-105	0	0.260723	0.439521	0	0	164	164	0.114593	0
Microglia	T cells	Mertk	Cd247	0.550774	0.776987	1.62e-177	0	0.542465	0.439521	0	0	173	173	0.238425	0
Microglia	T cells	P2rx7	Cd247	0.243936	0.776987	3.87e-48	0	0.224149	0.439521	0	0	187	187	0.098518	0
Microglia	T cells	Slamf6	Cd247	0.245241	0.776987	2.49e-101	0	0.135706	0.439521	0	0	282	282	0.0596456	0
Microglia	T cells	Tgfbr1	Cd247	1.65338	0.776987	0	0	1.5185	0.439521	0	0	155	155	0.667412	0
Microglia	T cells	Tgfbr2	Cd247	0.426765	0.776987	3.66e-103	0	0.515299	0.439521	0	0	185	185	0.226485	0
Microglia	T cells	Tlr2	Cd247	0.67404	0.776987	1.12e-219	0	0.376801	0.439521	0	0	191	191	0.165612	0
Microglia	T cells	Tlr7	Cd247	0.373398	0.776987	5.15e-151	0	0.22196	0.439521	0	0	197	197	0.0975562	0
Microglia	T cells	Tnfrsf1a	Cd247	0.290679	0.776987	5.47e-70	0	0.487201	0.439521	0	0	175	175	0.214135	0
Microglia	T cells	Ccr5	Cd3d	0.787015	2.18853	1.02e-259	0	0.521245	1.89805	0	0	207	207	0.989346	0
Microglia	T cells	Cd84	Cd3d	1.41512	2.18853	0	0	1.13359	1.89805	0	0	218	218	2.1516	0
Microglia	T cells	Cd86	Cd3d	0.80036	2.18853	0	0	0.538719	1.89805	0	0	280	280	1.02251	0
Microglia	T cells	Cysltr1	Cd3d	0.330729	2.18853	1.93e-124	0	0.194632	1.89805	0	0	154	154	0.36942	0
Microglia	T cells	Fcer1g	Cd3d	2.58993	2.18853	0	0	3.155	1.89805	0	0	387	387	5.98833	0
Microglia	T cells	Fcgr2b	Cd3d	0.762826	2.18853	0	0	0.516048	1.89805	0	0	224	224	0.979483	0
Microglia	T cells	Fcgr3	Cd3d	2.22822	2.18853	0	0	2.15977	1.89805	0	0	205	205	4.09934	0
Microglia	T cells	Gpr183	Cd3d	0.381069	2.18853	4.21e-115	0	0.239175	1.89805	0	0	196	196	0.453966	0
Microglia	T cells	Gpr65	Cd3d	0.400605	2.18853	3.25e-123	0	0.265015	1.89805	0	0	179	179	0.50301	0
Microglia	T cells	Il10ra	Cd3d	0.753104	2.18853	7.41e-286	0	0.499908	1.89805	0	0	333	333	0.948847	0
Microglia	T cells	Il17ra	Cd3d	0.382943	2.18853	3.72e-88	0	0.276227	1.89805	0	0	232	232	0.524291	0
Microglia	T cells	Il4ra	Cd3d	0.324837	2.18853	2.47e-85	0	0.246051	1.89805	0	0	323	323	0.467016	0
Microglia	T cells	Il6st	Cd3d	0.154211	2.18853	8.29e-21	0	0.269158	1.89805	0	0	183	183	0.510873	0
Microglia	T cells	Itgam	Cd3d	1.10838	2.18853	0	0	0.807712	1.89805	0	0	184	184	1.53307	0
Microglia	T cells	Itgax	Cd3d	0.320649	2.18853	1.53e-121	0	0.179606	1.89805	0	0	224	224	0.340901	0
Microglia	T cells	Itgb2	Cd3d	0.914482	2.18853	0	0	0.712228	1.89805	0	0	247	247	1.35184	0
Microglia	T cells	P2rx7	Cd3d	0.243936	2.18853	3.87e-48	0	0.224149	1.89805	0	0	172	172	0.425444	0
Microglia	T cells	Slamf6	Cd3d	0.245241	2.18853	2.49e-101	0	0.135706	1.89805	0	0	474	474	0.257576	0
Microglia	T cells	Tlr7	Cd3d	0.373398	2.18853	5.15e-151	0	0.22196	1.89805	0	0	204	204	0.421291	0
Microglia	T cells	Adgre1	Cd3e	0.900775	1.79275	0	0	0.62517	1.38202	0	0	690	690	0.863997	0
Microglia	T cells	Ccr5	Cd3e	0.787015	1.79275	1.02e-259	0	0.521245	1.38202	0	0	295	295	0.72037	0
Microglia	T cells	Ccrl2	Cd3e	0.726897	1.79275	7.44e-139	0	0.480314	1.38202	0	0	155	155	0.663804	0
Microglia	T cells	Cd300a	Cd3e	0.466738	1.79275	1.76e-175	0	0.298781	1.38202	0	0	155	155	0.412921	0
Microglia	T cells	Cd84	Cd3e	1.41512	1.79275	0	0	1.13359	1.38202	0	0	155	155	1.56664	0
Microglia	T cells	Cd86	Cd3e	0.80036	1.79275	0	0	0.538719	1.38202	0	0	556	556	0.74452	0
Microglia	T cells	Csf1r	Cd3e	2.35574	1.79275	0	0	2.27991	1.38202	0	0	483	483	3.15088	0
Microglia	T cells	Csf2ra	Cd3e	0.72658	1.79275	2.17e-235	0	0.618701	1.38202	0	0	286	286	0.855057	0
Microglia	T cells	Csf3r	Cd3e	0.79869	1.79275	0	0	0.576699	1.38202	0	0	256	256	0.79701	0
Microglia	T cells	Cx3cr1	Cd3e	2.38187	1.79275	0	0	2.2583	1.38202	0	0	264	264	3.12102	0
Microglia	T cells	Fcer1g	Cd3e	2.58993	1.79275	0	0	3.155	1.38202	0	0	435	435	4.36027	0
Microglia	T cells	Fcgr1	Cd3e	1.09341	1.79275	0	0	0.766568	1.38202	0	0	358	358	1.05941	0
Microglia	T cells	Fcgr2b	Cd3e	0.762826	1.79275	0	0	0.516048	1.38202	0	0	694	694	0.713189	0
Microglia	T cells	Fcgr3	Cd3e	2.22822	1.79275	0	0	2.15977	1.38202	0	0	461	461	2.98484	0
Microglia	T cells	Il10ra	Cd3e	0.753104	1.79275	7.41e-286	0	0.499908	1.38202	0	0	317	317	0.690882	0
Microglia	T cells	Il17ra	Cd3e	0.382943	1.79275	3.72e-88	0	0.276227	1.38202	0	0	206	206	0.381751	0
Microglia	T cells	Il4ra	Cd3e	0.324837	1.79275	2.47e-85	0	0.246051	1.38202	0	0	236	236	0.340047	0
Microglia	T cells	Il6ra	Cd3e	0.535676	1.79275	3.58e-160	0	0.447431	1.38202	0	0	154	154	0.618358	0
Microglia	T cells	Itgam	Cd3e	1.10838	1.79275	0	0	0.807712	1.38202	0	0	806	806	1.11627	0
Microglia	T cells	Itgax	Cd3e	0.320649	1.79275	1.53e-121	0	0.179606	1.38202	0	0	758	758	0.248219	0
Microglia	T cells	Itgb2	Cd3e	0.914482	1.79275	0	0	0.712228	1.38202	0	0	217	217	0.984314	0
Microglia	T cells	Mertk	Cd3e	0.550774	1.79275	1.62e-177	0	0.542465	1.38202	0	0	246	246	0.749697	0
Microglia	T cells	Nrp1	Cd3e	0.308303	1.79275	2.87e-81	0	0.479	1.38202	0	0	150	150	0.661988	0
Microglia	T cells	Slamf6	Cd3e	0.245241	1.79275	2.49e-101	0	0.135706	1.38202	0	0	258	258	0.187548	0
Microglia	T cells	Tlr2	Cd3e	0.67404	1.79275	1.12e-219	0	0.376801	1.38202	0	0	262	262	0.520747	0
Microglia	T cells	Tlr7	Cd3e	0.373398	1.79275	5.15e-151	0	0.22196	1.38202	0	0	229	229	0.306753	0
Microglia	T cells	Tnfrsf11a	Cd3e	0.25051	1.79275	5.67e-76	0	0.156979	1.38202	0	0	177	177	0.216948	0
Microglia	T cells	Tnfrsf1a	Cd3e	0.290679	1.79275	5.47e-70	0	0.487201	1.38202	0	0	160	160	0.673322	0
Microglia	T cells	Ccr5	Cd3g	0.787015	2.51845	1.02e-259	0	0.521245	2.27827	0	0	253	253	1.18754	0
Microglia	T cells	Cd84	Cd3g	1.41512	2.51845	0	0	1.13359	2.27827	0	0	329	329	2.58262	0
Microglia	T cells	Cd86	Cd3g	0.80036	2.51845	0	0	0.538719	2.27827	0	0	316	316	1.22735	0
Microglia	T cells	Csf1r	Cd3g	2.35574	2.51845	0	0	2.27991	2.27827	0	0	162	162	5.19425	0
Microglia	T cells	Fcer1g	Cd3g	2.58993	2.51845	0	0	3.155	2.27827	0	0	469	469	7.18794	0
Microglia	T cells	Gpr65	Cd3g	0.400605	2.51845	3.25e-123	0	0.265015	2.27827	0	0	239	239	0.603776	0
Microglia	T cells	Il10ra	Cd3g	0.753104	2.51845	7.41e-286	0	0.499908	2.27827	0	0	362	362	1.13893	0
Microglia	T cells	Il17ra	Cd3g	0.382943	2.51845	3.72e-88	0	0.276227	2.27827	0	0	251	251	0.62932	0
Microglia	T cells	Il4ra	Cd3g	0.324837	2.51845	2.47e-85	0	0.246051	2.27827	0	0	446	446	0.560571	0
Microglia	T cells	Itgam	Cd3g	1.10838	2.51845	0	0	0.807712	2.27827	0	0	181	181	1.84019	0
Microglia	T cells	Itgax	Cd3g	0.320649	2.51845	1.53e-121	0	0.179606	2.27827	0	0	202	202	0.409192	0
Microglia	T cells	Itgb2	Cd3g	0.914482	2.51845	0	0	0.712228	2.27827	0	0	299	299	1.62265	0
Microglia	T cells	P2rx7	Cd3g	0.243936	2.51845	3.87e-48	0	0.224149	2.27827	0	0	159	159	0.510671	0
Microglia	T cells	Slamf6	Cd3g	0.245241	2.51845	2.49e-101	0	0.135706	2.27827	0	0	567	567	0.309175	0
Microglia	T cells	Tlr2	Cd3g	0.67404	2.51845	1.12e-219	0	0.376801	2.27827	0	0	153	153	0.858455	0
Microglia	T cells	Tlr7	Cd3g	0.373398	2.51845	5.15e-151	0	0.22196	2.27827	0	0	186	186	0.505686	0
Microglia	T cells	Adgre1	Cd8a	0.900775	1.83975	0	0	0.62517	1.41259	0	0	469	469	0.883111	0
Microglia	T cells	Ccr5	Cd8a	0.787015	1.83975	1.02e-259	0	0.521245	1.41259	0	0	225	225	0.736307	0
Microglia	T cells	Cd180	Cd8a	1.05709	1.83975	0	0	0.744962	1.41259	0	0	179	179	1.05233	0
Microglia	T cells	Csf1r	Cd8a	2.35574	1.83975	0	0	2.27991	1.41259	0	0	167	167	3.22058	0
Microglia	T cells	Fcgr2b	Cd8a	0.762826	1.83975	0	0	0.516048	1.41259	0	0	467	467	0.728966	0
Microglia	T cells	Il10ra	Cd8a	0.753104	1.83975	7.41e-286	0	0.499908	1.41259	0	0	224	224	0.706166	0
Microglia	T cells	Il4ra	Cd8a	0.324837	1.83975	2.47e-85	0	0.246051	1.41259	0	0	168	168	0.34757	0
Microglia	T cells	Itgam	Cd8a	1.10838	1.83975	0	0	0.807712	1.41259	0	0	547	547	1.14097	0
Microglia	T cells	Itgax	Cd8a	0.320649	1.83975	1.53e-121	0	0.179606	1.41259	0	0	560	560	0.25371	0
Microglia	T cells	Slamf6	Cd8a	0.245241	1.83975	2.49e-101	0	0.135706	1.41259	0	0	246	246	0.191697	0
Microglia	T cells	Tlr7	Cd8a	0.373398	1.83975	5.15e-151	0	0.22196	1.41259	0	0	171	171	0.313539	0
Microglia	T cells	Tnfrsf1a	Cd8a	0.290679	1.83975	5.47e-70	0	0.487201	1.41259	0	0	195	195	0.688217	0
Microglia	T cells	Adgre1	Cd8b1	0.900775	2.04039	0	0	0.62517	1.57708	0	0	363	363	0.985942	0
Microglia	T cells	Ccr5	Cd8b1	0.787015	2.04039	1.02e-259	0	0.521245	1.57708	0	0	251	251	0.822044	0
Microglia	T cells	Csf3r	Cd8b1	0.79869	2.04039	0	0	0.576699	1.57708	0	0	175	175	0.9095	0
Microglia	T cells	Fcgr2b	Cd8b1	0.762826	2.04039	0	0	0.516048	1.57708	0	0	374	374	0.813848	0
Microglia	T cells	Fcgr3	Cd8b1	2.22822	2.04039	0	0	2.15977	1.57708	0	0	156	156	3.40613	0
Microglia	T cells	Ifngr1	Cd8b1	1.0074	2.04039	7.75e-287	0	1.06692	1.57708	0	0	182	182	1.68262	0
Microglia	T cells	Il10ra	Cd8b1	0.753104	2.04039	7.41e-286	0	0.499908	1.57708	0	0	172	172	0.788393	0
Microglia	T cells	Il4ra	Cd8b1	0.324837	2.04039	2.47e-85	0	0.246051	1.57708	0	0	240	240	0.388041	0
Microglia	T cells	Itgam	Cd8b1	1.10838	2.04039	0	0	0.807712	1.57708	0	0	476	476	1.27383	0
Microglia	T cells	Itgax	Cd8b1	0.320649	2.04039	1.53e-121	0	0.179606	1.57708	0	0	472	472	0.283253	0
Microglia	T cells	Tlr7	Cd8b1	0.373398	2.04039	5.15e-151	0	0.22196	1.57708	0	0	151	151	0.350049	0
Microglia	T cells	Cd300a	Crtam	0.466738	0.450056	1.76e-175	3.44e-176	0.298781	0.234432	0	0	235	235	0.0700439	0
Microglia	T cells	Tlr7	Crtam	0.373398	0.450056	5.15e-151	3.44e-176	0.22196	0.234432	0	0	187	187	0.0520347	0
Microglia	T cells	Axl	Itga4	0.609132	0.946421	8.89e-186	9.04e-224	0.536099	0.634668	0	0	156	156	0.340245	0
Microglia	T cells	Ccrl2	Itga4	0.726897	0.946421	7.44e-139	9.04e-224	0.480314	0.634668	0	0	273	273	0.30484	0
Microglia	T cells	Cd180	Itga4	1.05709	0.946421	0	9.04e-224	0.744962	0.634668	0	0	177	177	0.472804	0
Microglia	T cells	Lair1	Itga4	1.57154	0.946421	0	9.04e-224	1.34635	0.634668	0	0	155	155	0.854487	0
Microglia	T cells	Lrp1	Itga4	0.554107	0.946421	1.05e-174	9.04e-224	0.576563	0.634668	0	0	223	223	0.365926	0
Microglia	T cells	Ltbr	Itga4	0.143605	0.946421	1.5e-27	9.04e-224	0.188611	0.634668	0	0	265	265	0.119705	0
Microglia	T cells	Notch2	Itga4	0.336838	0.946421	8.08e-64	9.04e-224	0.410606	0.634668	0	0	162	162	0.260598	0
Microglia	T cells	Nrp1	Itga4	0.308303	0.946421	2.87e-81	9.04e-224	0.479	0.634668	0	0	285	285	0.304006	0
Microglia	T cells	Slamf6	Itga4	0.245241	0.946421	2.49e-101	9.04e-224	0.135706	0.634668	0	0	171	171	0.0861281	0
Microglia	T cells	Tgfbr1	Itga4	1.65338	0.946421	0	9.04e-224	1.5185	0.634668	0	0	250	250	0.963742	0
Microglia	T cells	Tgfbr2	Itga4	0.426765	0.946421	3.66e-103	9.04e-224	0.515299	0.634668	0	0	213	213	0.327044	0
Microglia	T cells	Tlr2	Itga4	0.67404	0.946421	1.12e-219	9.04e-224	0.376801	0.634668	0	0	253	253	0.239144	0
Microglia	T cells	Tlr7	Itga4	0.373398	0.946421	5.15e-151	9.04e-224	0.22196	0.634668	0	0	266	266	0.140871	0
Microglia	T cells	Tnfrsf11a	Itga4	0.25051	0.946421	5.67e-76	9.04e-224	0.156979	0.634668	0	0	248	248	0.0996296	0
Microglia	T cells	Tnfrsf13b	Itga4	0.551081	0.946421	2.85e-219	9.04e-224	0.334016	0.634668	0	0	174	174	0.211989	0
Microglia	T cells	Tnfrsf1a	Itga4	0.290679	0.946421	5.47e-70	9.04e-224	0.487201	0.634668	0	0	182	182	0.309211	0
Microglia	T cells	Ccrl2	Itgal	0.726897	0.712307	7.44e-139	8.38e-179	0.480314	0.400804	0	0	262	262	0.192512	0
Microglia	T cells	Cd180	Itgal	1.05709	0.712307	0	8.38e-179	0.744962	0.400804	0	0	205	205	0.298584	0
Microglia	T cells	Cd300a	Itgal	0.466738	0.712307	1.76e-175	8.38e-179	0.298781	0.400804	0	0	182	182	0.119753	0
Microglia	T cells	Gpr183	Itgal	0.381069	0.712307	4.21e-115	8.38e-179	0.239175	0.400804	0	0	165	165	0.0958625	0
Microglia	T cells	Lrp1	Itgal	0.554107	0.712307	1.05e-174	8.38e-179	0.576563	0.400804	0	0	208	208	0.231089	0
Microglia	T cells	Mertk	Itgal	0.550774	0.712307	1.62e-177	8.38e-179	0.542465	0.400804	0	0	151	151	0.217422	0
Microglia	T cells	Notch2	Itgal	0.336838	0.712307	8.08e-64	8.38e-179	0.410606	0.400804	0	0	176	176	0.164572	0
Microglia	T cells	Nrp1	Itgal	0.308303	0.712307	2.87e-81	8.38e-179	0.479	0.400804	0	0	215	215	0.191985	0
Microglia	T cells	P2ry13	Itgal	1.00464	0.712307	0	8.38e-179	0.650169	0.400804	0	0	215	215	0.260591	0
Microglia	T cells	Ptafr	Itgal	0.85409	0.712307	0	8.38e-179	0.535133	0.400804	0	0	203	203	0.214484	0
Microglia	T cells	Slamf6	Itgal	0.245241	0.712307	2.49e-101	8.38e-179	0.135706	0.400804	0	0	493	493	0.0543915	0
Microglia	T cells	Stab1	Itgal	0.479068	0.712307	7.69e-157	8.38e-179	0.368889	0.400804	0	0	156	156	0.147852	0
Microglia	T cells	Tgfbr1	Itgal	1.65338	0.712307	0	8.38e-179	1.5185	0.400804	0	0	151	151	0.608621	0
Microglia	T cells	Tlr13	Itgal	0.288736	0.712307	2.97e-108	8.38e-179	0.158983	0.400804	0	0	204	204	0.0637212	0
Microglia	T cells	Tlr2	Itgal	0.67404	0.712307	1.12e-219	8.38e-179	0.376801	0.400804	0	0	432	432	0.151024	0
Microglia	T cells	Tlr7	Itgal	0.373398	0.712307	5.15e-151	8.38e-179	0.22196	0.400804	0	0	372	372	0.0889626	0
Microglia	T cells	Tnfrsf13b	Itgal	0.551081	0.712307	2.85e-219	8.38e-179	0.334016	0.400804	0	0	206	206	0.133875	0
Microglia	T cells	Tnfrsf1a	Itgal	0.290679	0.712307	5.47e-70	8.38e-179	0.487201	0.400804	0	0	233	233	0.195272	0
Microglia	T cells	Axl	Itgb1	0.609132	0.212652	8.89e-186	0.683684	0.536099	0.556815	0	0	189	189	0.298508	0
Microglia	T cells	Ccrl2	Itgb1	0.726897	0.212652	7.44e-139	0.683684	0.480314	0.556815	0	0	155	155	0.267446	0
Microglia	T cells	Lrp1	Itgb1	0.554107	0.212652	1.05e-174	0.683684	0.576563	0.556815	0	0	503	503	0.321039	0
Microglia	T cells	Ltbr	Itgb1	0.143605	0.212652	1.5e-27	0.683684	0.188611	0.556815	0	0	236	236	0.105021	0
Microglia	T cells	Notch2	Itgb1	0.336838	0.212652	8.08e-64	0.683684	0.410606	0.556815	0	0	292	292	0.228631	0
Microglia	T cells	Nrp1	Itgb1	0.308303	0.212652	2.87e-81	0.683684	0.479	0.556815	0	0	341	341	0.266714	0
Microglia	T cells	P2ry12	Itgb1	2.23871	0.212652	0	0.683684	1.82482	0.556815	0	0	208	208	1.01608	0
Microglia	T cells	Plxnb2	Itgb1	0.508089	0.212652	8.54e-164	0.683684	0.394444	0.556815	0	0	195	195	0.219632	0
Microglia	T cells	Ptpro	Itgb1	0.325283	0.212652	2.41e-123	0.683684	0.19867	0.556815	0	0	168	168	0.110622	0
Microglia	T cells	Rpsa	Itgb1	0.363164	0.212652	8.81e-100	0.683684	2.40477	0.556815	0	0	177	177	1.33901	0
Microglia	T cells	Tgfbr1	Itgb1	1.65338	0.212652	0	0.683684	1.5185	0.556815	0	0	346	346	0.845523	0
Microglia	T cells	Tgfbr2	Itgb1	0.426765	0.212652	3.66e-103	0.683684	0.515299	0.556815	0	0	308	308	0.286926	0
Microglia	T cells	Tlr2	Itgb1	0.67404	0.212652	1.12e-219	0.683684	0.376801	0.556815	0	0	294	294	0.209808	0
Microglia	T cells	Tlr7	Itgb1	0.373398	0.212652	5.15e-151	0.683684	0.22196	0.556815	0	0	172	172	0.123591	0
Microglia	T cells	Tnfrsf1a	Itgb1	0.290679	0.212652	5.47e-70	0.683684	0.487201	0.556815	0	0	286	286	0.271281	0
Microglia	T cells	Axl	Itgb2	0.609132	0.358083	8.89e-186	1.11e-06	0.536099	0.411177	0	0	197	197	0.220432	0
Microglia	T cells	Ccrl2	Itgb2	0.726897	0.358083	7.44e-139	1.11e-06	0.480314	0.411177	0	0	265	265	0.197494	0
Microglia	T cells	Cd180	Itgb2	1.05709	0.358083	0	1.11e-06	0.744962	0.411177	0	0	331	331	0.306311	0
Microglia	T cells	Gpr183	Itgb2	0.381069	0.358083	4.21e-115	1.11e-06	0.239175	0.411177	0	0	258	258	0.0983434	0
Microglia	T cells	Gpr34	Itgb2	2.06332	0.358083	0	1.11e-06	1.73261	0.411177	0	0	196	196	0.712409	0
Microglia	T cells	Gpr84	Itgb2	0.930171	0.358083	3.3e-301	1.11e-06	0.503551	0.411177	0	0	198	198	0.207048	0
Microglia	T cells	Ltbr	Itgb2	0.143605	0.358083	1.5e-27	1.11e-06	0.188611	0.411177	0	0	216	216	0.0775523	0
Microglia	T cells	Notch2	Itgb2	0.336838	0.358083	8.08e-64	1.11e-06	0.410606	0.411177	0	0	169	169	0.168831	0
Microglia	T cells	P2rx7	Itgb2	0.243936	0.358083	3.87e-48	1.11e-06	0.224149	0.411177	0	0	240	240	0.0921647	0
Microglia	T cells	P2ry12	Itgb2	2.23871	0.358083	0	1.11e-06	1.82482	0.411177	0	0	187	187	0.750322	0
Microglia	T cells	P2ry13	Itgb2	1.00464	0.358083	0	1.11e-06	0.650169	0.411177	0	0	186	186	0.267335	0
Microglia	T cells	P2ry6	Itgb2	1.33787	0.358083	0	1.11e-06	1.0024	0.411177	0	0	365	365	0.412164	0
Microglia	T cells	Plxnb2	Itgb2	0.508089	0.358083	8.54e-164	1.11e-06	0.394444	0.411177	0	0	206	206	0.162186	0
Microglia	T cells	Slamf6	Itgb2	0.245241	0.358083	2.49e-101	1.11e-06	0.135706	0.411177	0	0	243	243	0.0557991	0
Microglia	T cells	Stab1	Itgb2	0.479068	0.358083	7.69e-157	1.11e-06	0.368889	0.411177	0	0	207	207	0.151679	0
Microglia	T cells	Tgfbr1	Itgb2	1.65338	0.358083	0	1.11e-06	1.5185	0.411177	0	0	302	302	0.624372	0
Microglia	T cells	Tgfbr2	Itgb2	0.426765	0.358083	3.66e-103	1.11e-06	0.515299	0.411177	0	0	234	234	0.211879	0
Microglia	T cells	Tlr13	Itgb2	0.288736	0.358083	2.97e-108	1.11e-06	0.158983	0.411177	0	0	316	316	0.0653703	0
Microglia	T cells	Tlr2	Itgb2	0.67404	0.358083	1.12e-219	1.11e-06	0.376801	0.411177	0	0	567	567	0.154932	0
Microglia	T cells	Tlr7	Itgb2	0.373398	0.358083	5.15e-151	1.11e-06	0.22196	0.411177	0	0	591	591	0.0912649	0
Microglia	T cells	Tnfrsf13b	Itgb2	0.551081	0.358083	2.85e-219	1.11e-06	0.334016	0.411177	0	0	237	237	0.13734	0
Microglia	T cells	Tnfrsf1a	Itgb2	0.290679	0.358083	5.47e-70	1.11e-06	0.487201	0.411177	0	0	227	227	0.200326	0
Microglia	T cells	Trem2	Itgb2	2.79904	0.358083	0	1.11e-06	3.07494	0.411177	0	0	449	449	1.26435	0
Microglia	T cells	Vsir	Itgb2	1.58757	0.358083	0	1.11e-06	1.46011	0.411177	0	0	215	215	0.600363	0
Microglia	T cells	Ccrl2	Itgb7	0.726897	0.615201	7.44e-139	2.59e-190	0.480314	0.345574	0	0	163	163	0.165984	0
Microglia	T cells	Cd300a	Itgb7	0.466738	0.615201	1.76e-175	2.59e-190	0.298781	0.345574	0	0	161	161	0.103251	0
Microglia	T cells	Ltbr	Itgb7	0.143605	0.615201	1.5e-27	2.59e-190	0.188611	0.345574	0	0	387	387	0.0651789	0
Microglia	T cells	Mertk	Itgb7	0.550774	0.615201	1.62e-177	2.59e-190	0.542465	0.345574	0	0	183	183	0.187462	0
Microglia	T cells	Plxnb2	Itgb7	0.508089	0.615201	8.54e-164	2.59e-190	0.394444	0.345574	0	0	152	152	0.13631	0
Microglia	T cells	Slamf6	Itgb7	0.245241	0.615201	2.49e-101	2.59e-190	0.135706	0.345574	0	0	185	185	0.0468964	0
Microglia	T cells	Tgfbr1	Itgb7	1.65338	0.615201	0	2.59e-190	1.5185	0.345574	0	0	213	213	0.524754	0
Microglia	T cells	Tgfbr2	Itgb7	0.426765	0.615201	3.66e-103	2.59e-190	0.515299	0.345574	0	0	181	181	0.178074	0
Microglia	T cells	Tlr2	Itgb7	0.67404	0.615201	1.12e-219	2.59e-190	0.376801	0.345574	0	0	156	156	0.130213	0
Microglia	T cells	Tnfrsf11a	Itgb7	0.25051	0.615201	5.67e-76	2.59e-190	0.156979	0.345574	0	0	465	465	0.0542479	0
Microglia	T cells	Tnfrsf13b	Itgb7	0.551081	0.615201	2.85e-219	2.59e-190	0.334016	0.345574	0	0	176	176	0.115427	0
Microglia	T cells	Cd300a	Klrd1	0.466738	1.07505	1.76e-175	2e-298	0.298781	0.538661	0	0	434	434	0.160941	0
Microglia	T cells	Lair1	Klrd1	1.57154	1.07505	0	2e-298	1.34635	0.538661	0	0	474	474	0.725228	0
Microglia	T cells	Lrp1	Klrd1	0.554107	1.07505	1.05e-174	2e-298	0.576563	0.538661	0	0	234	234	0.310572	0
Microglia	T cells	P2ry13	Klrd1	1.00464	1.07505	0	2e-298	0.650169	0.538661	0	0	209	209	0.350221	0
Microglia	T cells	Slamf6	Klrd1	0.245241	1.07505	2.49e-101	2e-298	0.135706	0.538661	0	0	663	663	0.0730995	0
Microglia	T cells	Tlr2	Klrd1	0.67404	1.07505	1.12e-219	2e-298	0.376801	0.538661	0	0	277	277	0.202968	0
Microglia	T cells	Tlr7	Klrd1	0.373398	1.07505	5.15e-151	2e-298	0.22196	0.538661	0	0	259	259	0.119561	0
Microglia	T cells	Ccrl2	Klrk1	0.726897	1.11257	7.44e-139	1.94e-263	0.480314	0.524609	0	0	175	175	0.251977	0
Microglia	T cells	Cd300a	Klrk1	0.466738	1.11257	1.76e-175	1.94e-263	0.298781	0.524609	0	0	281	281	0.156743	0
Microglia	T cells	Lair1	Klrk1	1.57154	1.11257	0	1.94e-263	1.34635	0.524609	0	0	381	381	0.706309	0
Microglia	T cells	Plxnb2	Klrk1	0.508089	1.11257	8.54e-164	1.94e-263	0.394444	0.524609	0	0	166	166	0.206929	0
Microglia	T cells	Slamf6	Klrk1	0.245241	1.11257	2.49e-101	1.94e-263	0.135706	0.524609	0	0	634	634	0.0711925	0
Microglia	T cells	Tlr7	Klrk1	0.373398	1.11257	5.15e-151	1.94e-263	0.22196	0.524609	0	0	363	363	0.116442	0
Mural cells	T cells	Itga7	Itgal	0.835593	0.712307	8.7e-211	8.38e-179	0.435269	0.400804	0	720	129	745	0.174458	0
Mural cells	T cells	Itga7	Itgb1	0.835593	0.212652	8.7e-211	0.683684	0.435269	0.556815	0	900	802	979	0.242364	0
Mural cells	T cells	Itga7	Itgb2	0.835593	0.358083	8.7e-211	1.11e-06	0.435269	0.411177	0	720	663	901	0.178973	0
Mural cells	T cells	Itga7	Itgb7	0.835593	0.615201	8.7e-211	2.59e-190	0.435269	0.345574	0	800	545	905	0.150418	0
Mural cells	T cells	Itgb1	Itgb2	0.996509	0.358083	1.13e-32	1.11e-06	1.07572	0.411177	0	800	98	812	0.442312	0
Mural cells	T cells	Itgb1	Itgb7	0.996509	0.615201	1.13e-32	2.59e-190	1.07572	0.345574	0	720	92	735	0.371741	0
Mural cells	T cells	Itgb5	Itgb7	0.173791	0.615201	1	2.59e-190	0.767471	0.345574	0	720	75	730	0.265218	0
Mural cells	T cells	Ackr3	Itga4	1.32265	0.946421	1.07e-138	9.04e-224	0.810731	0.634668	0	0	179	179	0.514545	0
Mural cells	T cells	Ackr3	Itgb1	1.32265	0.212652	1.07e-138	0.683684	0.810731	0.556815	0	0	250	250	0.451427	0
Mural cells	T cells	Bmpr1a	Cd247	0.340048	0.776987	0.120197	0	0.215491	0.439521	0	0	155	155	0.0947127	0
Mural cells	T cells	Bmpr1a	Cd8a	0.340048	1.83975	0.120197	0	0.215491	1.41259	0	0	160	160	0.304401	0
Mural cells	T cells	Bmpr1a	Itga4	0.340048	0.946421	0.120197	9.04e-224	0.215491	0.634668	0	0	193	193	0.136765	0
Mural cells	T cells	Bmpr1a	Itgb1	0.340048	0.212652	0.120197	0.683684	0.215491	0.556815	0	0	314	314	0.119988	0
Mural cells	T cells	Bmpr1a	Itgb2	0.340048	0.358083	0.120197	1.11e-06	0.215491	0.411177	0	0	322	322	0.0886048	0
Mural cells	T cells	Fgfr1	Itga4	0.508031	0.946421	1.35e-18	9.04e-224	0.309716	0.634668	0	0	160	160	0.196567	0
Mural cells	T cells	Fgfr1	Itgb1	0.508031	0.212652	1.35e-18	0.683684	0.309716	0.556815	0	0	349	349	0.172454	0
Mural cells	T cells	Fgfr1	Itgb2	0.508031	0.358083	1.35e-18	1.11e-06	0.309716	0.411177	0	0	167	167	0.127348	0
Mural cells	T cells	Fgfr1	Itgb7	0.508031	0.615201	1.35e-18	2.59e-190	0.309716	0.345574	0	0	196	196	0.10703	0
Mural cells	T cells	Il11ra1	Itgb2	0.403929	0.358083	0.665721	1.11e-06	0.371808	0.411177	0	0	182	182	0.152879	0
Mural cells	T cells	Il13ra1	Itgb1	0.463587	0.212652	0.000328392	0.683684	0.295118	0.556815	0	0	170	170	0.164326	0
Mural cells	T cells	Il15ra	Klrd1	0.317252	1.07505	8.34e-05	2e-298	0.193851	0.538661	0	0	187	187	0.10442	0
Mural cells	T cells	Il15ra	Klrk1	0.317252	1.11257	8.34e-05	1.94e-263	0.193851	0.524609	0	0	339	339	0.101696	0
Mural cells	T cells	Notch1	Klrk1	0.323609	1.11257	1	1.94e-263	0.299582	0.524609	0	0	152	152	0.157164	0
Mural cells	T cells	Pdgfrb	Klrk1	2.34991	1.11257	0	1.94e-263	1.97897	0.524609	0	0	189	189	1.03819	0
Mural cells	T cells	Tnfrsf1a	Cd160	0.526045	0.558399	0.000229038	3.65e-208	0.545866	0.27683	0	0	470	470	0.151112	0
Mural cells	T cells	Tnfrsf1a	Klrk1	0.526045	1.11257	0.000229038	1.94e-263	0.545866	0.524609	0	0	252	252	0.286367	0
Mural cells	T cells	Itga1	Itga4	0.683506	0.946421	3.12e-48	9.04e-224	0.406958	0.634668	0	720	297	794	0.258283	0
Mural cells	T cells	Itga7	Itga4	0.835593	0.946421	8.7e-211	9.04e-224	0.435269	0.634668	0	720	217	771	0.276251	0
Mural cells	T cells	Itgb1	Itga4	0.996509	0.946421	1.13e-32	9.04e-224	1.07572	0.634668	0	900	906	990	0.682725	0
Mural cells	T cells	Itgb5	Itga4	0.173791	0.946421	1	9.04e-224	0.767471	0.634668	0	800	664	929	0.487089	0
Mural cells	T cells	Itga1	Itgal	0.683506	0.712307	3.12e-48	8.38e-179	0.406958	0.400804	0	720	175	759	0.16311	0
Mural cells	T cells	Itgb1	Itgal	0.996509	0.712307	1.13e-32	8.38e-179	1.07572	0.400804	0	800	793	956	0.431154	0
Mural cells	T cells	Itgb5	Itgal	0.173791	0.712307	1	8.38e-179	0.767471	0.400804	0	720	468	844	0.307605	0
Mural cells	T cells	Itga1	Itgb1	0.683506	0.212652	3.12e-48	0.683684	0.406958	0.556815	0	900	800	979	0.2266	0
Mural cells	T cells	Itgb5	Itgb1	0.173791	0.212652	1	0.683684	0.767471	0.556815	0	720	142	749	0.427339	0
Mural cells	T cells	Itga1	Itgb2	0.683506	0.358083	3.12e-48	1.11e-06	0.406958	0.411177	0	720	571	874	0.167332	0
Mural cells	T cells	Itgb5	Itgb2	0.173791	0.358083	1	1.11e-06	0.767471	0.411177	0	720	94	735	0.315566	0
Mural cells	T cells	Itga1	Itgb7	0.683506	0.615201	3.12e-48	2.59e-190	0.406958	0.345574	0	800	541	904	0.140634	0
Mural cells	T cells	Ackr3	B2m	1.32265	0.464139	1.07e-138	1.59e-27	0.810731	3.55004	0	0	157	157	2.87812	0
Mural cells	T cells	Axl	B2m	0.990833	0.464139	5.11e-52	1.59e-27	0.814801	3.55004	0	0	186	186	2.89258	0
Mural cells	T cells	Ccrl2	B2m	0.333895	0.464139	0.35242	1.59e-27	0.330855	3.55004	0	0	209	209	1.17455	0
Mural cells	T cells	Fcgrt	B2m	0.431963	0.464139	1.32e-07	1.59e-27	0.67753	3.55004	0	0	920	920	2.40526	0
Mural cells	T cells	Fgfr1	B2m	0.508031	0.464139	1.35e-18	1.59e-27	0.309716	3.55004	0	0	180	180	1.0995	0
Mural cells	T cells	Il13ra1	B2m	0.463587	0.464139	0.000328392	1.59e-27	0.295118	3.55004	0	0	171	171	1.04768	0
Mural cells	T cells	Il15ra	B2m	0.317252	0.464139	8.34e-05	1.59e-27	0.193851	3.55004	0	0	190	190	0.68818	0
Mural cells	T cells	Itgb1	B2m	0.996509	0.464139	1.13e-32	1.59e-27	1.07572	3.55004	0	0	252	252	3.81885	0
Mural cells	T cells	Notch1	B2m	0.323609	0.464139	1	1.59e-27	0.299582	3.55004	0	0	236	236	1.06353	0
Mural cells	T cells	Pdgfrb	B2m	2.34991	0.464139	0	1.59e-27	1.97897	3.55004	0	0	195	195	7.02542	0
Mural cells	T cells	Tnfrsf1a	B2m	0.526045	0.464139	0.000229038	1.59e-27	0.545866	3.55004	0	0	297	297	1.93785	0
Mural cells	T cells	Itga1	Cd160	0.683506	0.558399	3.12e-48	3.65e-208	0.406958	0.27683	0	0	396	396	0.112658	0
Mural cells	T cells	Tnfrsf21	Cd160	0.945925	0.558399	1.46e-32	3.65e-208	0.670745	0.27683	0	0	171	171	0.185683	0
Mural cells	T cells	Axl	Cd247	0.990833	0.776987	5.11e-52	0	0.814801	0.439521	0	0	213	213	0.358122	0
Mural cells	T cells	Il15ra	Cd247	0.317252	0.776987	8.34e-05	0	0.193851	0.439521	0	0	161	161	0.0852018	0
Mural cells	T cells	Itgb1	Cd247	0.996509	0.776987	1.13e-32	0	1.07572	0.439521	0	0	173	173	0.472802	0
Mural cells	T cells	Itgb5	Cd247	0.173791	0.776987	1	0	0.767471	0.439521	0	0	195	195	0.33732	0
Mural cells	T cells	Ptk7	Cd247	0.589008	0.776987	7.95e-109	0	0.275574	0.439521	0	0	172	172	0.121121	0
Mural cells	T cells	Ptprk	Cd247	0.718467	0.776987	2.92e-23	0	0.447102	0.439521	0	0	157	157	0.196511	0
Mural cells	T cells	Tnfrsf1a	Cd247	0.526045	0.776987	0.000229038	0	0.545866	0.439521	0	0	175	175	0.23992	0
Mural cells	T cells	Il15ra	Cd3d	0.317252	2.18853	8.34e-05	0	0.193851	1.89805	0	0	232	232	0.367939	0
Mural cells	T cells	Ccrl2	Cd3e	0.333895	1.79275	0.35242	0	0.330855	1.38202	0	0	155	155	0.457248	0
Mural cells	T cells	Il15ra	Cd3e	0.317252	1.79275	8.34e-05	0	0.193851	1.38202	0	0	175	175	0.267906	0
Mural cells	T cells	Itgb1	Cd3e	0.996509	1.79275	1.13e-32	0	1.07572	1.38202	0	0	194	194	1.48667	0
Mural cells	T cells	Notch1	Cd3e	0.323609	1.79275	1	0	0.299582	1.38202	0	0	182	182	0.414028	0
Mural cells	T cells	Tnfrsf1a	Cd3e	0.526045	1.79275	0.000229038	0	0.545866	1.38202	0	0	160	160	0.754398	0
Mural cells	T cells	Il15ra	Cd3g	0.317252	2.51845	8.34e-05	0	0.193851	2.27827	0	0	241	241	0.441646	0
Mural cells	T cells	Tnfrsf1a	Cd8a	0.526045	1.83975	0.000229038	0	0.545866	1.41259	0	0	195	195	0.771087	0
Mural cells	T cells	Il15ra	Cd8b1	0.317252	2.04039	8.34e-05	0	0.193851	1.57708	0	0	171	171	0.305719	0
Mural cells	T cells	Npy1r	Cd8b1	0.696743	2.04039	2.31e-140	0	0.297465	1.57708	0	0	165	165	0.469125	0
Mural cells	T cells	Adgre5	Itga4	0.394424	0.946421	1.96e-08	9.04e-224	0.345573	0.634668	0	0	218	218	0.219324	0
Mural cells	T cells	Axl	Itga4	0.990833	0.946421	5.11e-52	9.04e-224	0.814801	0.634668	0	0	156	156	0.517128	0
Mural cells	T cells	Bcam	Itga4	1.16145	0.946421	1.68e-63	9.04e-224	1.18705	0.634668	0	0	253	253	0.753381	0
Mural cells	T cells	Ccrl2	Itga4	0.333895	0.946421	0.35242	9.04e-224	0.330855	0.634668	0	0	273	273	0.209983	0
Mural cells	T cells	Lrp1	Itga4	0.567157	0.946421	3.38e-09	9.04e-224	0.540147	0.634668	0	0	223	223	0.342814	0
Mural cells	T cells	Notch1	Itga4	0.323609	0.946421	1	9.04e-224	0.299582	0.634668	0	0	232	232	0.190135	0
Mural cells	T cells	Pdgfrb	Itga4	2.34991	0.946421	0	9.04e-224	1.97897	0.634668	0	0	335	335	1.25599	0
Mural cells	T cells	Ptk7	Itga4	0.589008	0.946421	7.95e-109	9.04e-224	0.275574	0.634668	0	0	242	242	0.174898	0
Mural cells	T cells	Tnfrsf1a	Itga4	0.526045	0.946421	0.000229038	9.04e-224	0.545866	0.634668	0	0	182	182	0.346444	0
Mural cells	T cells	Adgre5	Itgal	0.394424	0.712307	1.96e-08	8.38e-179	0.345573	0.400804	0	0	267	267	0.138507	0
Mural cells	T cells	Ccrl2	Itgal	0.333895	0.712307	0.35242	8.38e-179	0.330855	0.400804	0	0	262	262	0.132608	0
Mural cells	T cells	Lrp1	Itgal	0.567157	0.712307	3.38e-09	8.38e-179	0.540147	0.400804	0	0	208	208	0.216493	0
Mural cells	T cells	Notch1	Itgal	0.323609	0.712307	1	8.38e-179	0.299582	0.400804	0	0	151	151	0.120074	0
Mural cells	T cells	Tnfrsf1a	Itgal	0.526045	0.712307	0.000229038	8.38e-179	0.545866	0.400804	0	0	233	233	0.218786	0
Mural cells	T cells	Adgre5	Itgb1	0.394424	0.212652	1.96e-08	0.683684	0.345573	0.556815	0	0	235	235	0.19242	0
Mural cells	T cells	Axl	Itgb1	0.990833	0.212652	5.11e-52	0.683684	0.814801	0.556815	0	0	189	189	0.453693	0
Mural cells	T cells	Bcam	Itgb1	1.16145	0.212652	1.68e-63	0.683684	1.18705	0.556815	0	0	245	245	0.660966	0
Mural cells	T cells	Ccrl2	Itgb1	0.333895	0.212652	0.35242	0.683684	0.330855	0.556815	0	0	155	155	0.184225	0
Mural cells	T cells	Lrp1	Itgb1	0.567157	0.212652	3.38e-09	0.683684	0.540147	0.556815	0	0	503	503	0.300762	0
Mural cells	T cells	Notch1	Itgb1	0.323609	0.212652	1	0.683684	0.299582	0.556815	0	0	399	399	0.166812	0
Mural cells	T cells	Notch3	Itgb1	1.96358	0.212652	0	0.683684	1.43954	0.556815	0	0	236	236	0.801556	0
Mural cells	T cells	Pdgfrb	Itgb1	2.34991	0.212652	0	0.683684	1.97897	0.556815	0	0	596	596	1.10192	0
Mural cells	T cells	Ptk7	Itgb1	0.589008	0.212652	7.95e-109	0.683684	0.275574	0.556815	0	0	154	154	0.153444	0
Mural cells	T cells	Tnfrsf1a	Itgb1	0.526045	0.212652	0.000229038	0.683684	0.545866	0.556815	0	0	286	286	0.303946	0
Mural cells	T cells	Adgre5	Itgb2	0.394424	0.358083	1.96e-08	1.11e-06	0.345573	0.411177	0	0	387	387	0.142092	0
Mural cells	T cells	Axl	Itgb2	0.990833	0.358083	5.11e-52	1.11e-06	0.814801	0.411177	0	0	197	197	0.335027	0
Mural cells	T cells	Ccrl2	Itgb2	0.333895	0.358083	0.35242	1.11e-06	0.330855	0.411177	0	0	265	265	0.13604	0
Mural cells	T cells	Notch3	Itgb2	1.96358	0.358083	0	1.11e-06	1.43954	0.411177	0	0	152	152	0.591904	0
Mural cells	T cells	Pdgfrb	Itgb2	2.34991	0.358083	0	1.11e-06	1.97897	0.411177	0	0	279	279	0.813706	0
Mural cells	T cells	Tnfrsf1a	Itgb2	0.526045	0.358083	0.000229038	1.11e-06	0.545866	0.411177	0	0	227	227	0.224448	0
Mural cells	T cells	Adgre5	Itgb7	0.394424	0.615201	1.96e-08	2.59e-190	0.345573	0.345574	0	0	210	210	0.119421	0
Mural cells	T cells	Ccrl2	Itgb7	0.333895	0.615201	0.35242	2.59e-190	0.330855	0.345574	0	0	163	163	0.114335	0
Mural cells	T cells	Pdgfrb	Itgb7	2.34991	0.615201	0	2.59e-190	1.97897	0.345574	0	0	167	167	0.68388	0
Mural cells	T cells	Itga1	Klrd1	0.683506	1.07505	3.12e-48	2e-298	0.406958	0.538661	0	0	347	347	0.219212	0
Mural cells	T cells	Lrp1	Klrd1	0.567157	1.07505	3.38e-09	2e-298	0.540147	0.538661	0	0	234	234	0.290956	0
Mural cells	T cells	Ccrl2	Klrk1	0.333895	1.11257	0.35242	1.94e-263	0.330855	0.524609	0	0	175	175	0.173569	0
Mural cells	T cells	Itga1	Klrk1	0.683506	1.11257	3.12e-48	1.94e-263	0.406958	0.524609	0	0	354	354	0.213494	0
Neuroblasts	T cells	Acvr2b	Cd247	0.468482	0.776987	0.000353216	0	0.279782	0.439521	0	0	165	165	0.12297	0
Neuroblasts	T cells	Erbb4	Itgb1	0.646819	0.212652	4.96e-30	0.683684	0.319384	0.556815	0	0	253	253	0.177838	0
Neuroblasts	T cells	Erbb4	Itgb2	0.646819	0.358083	4.96e-30	1.11e-06	0.319384	0.411177	0	0	190	190	0.131323	0
Neuroblasts	T cells	Gria2	Itgb1	1.08697	0.212652	3.07e-50	0.683684	0.792517	0.556815	0	0	220	220	0.441285	0
Neuroblasts	T cells	Gria2	Itgb2	1.08697	0.358083	3.07e-50	1.11e-06	0.792517	0.411177	0	0	158	158	0.325865	0
Neuroblasts	T cells	Igf1r	Itgb1	0.264564	0.212652	1	0.683684	0.556248	0.556815	0	0	356	356	0.309727	0
Neuroblasts	T cells	Igf1r	B2m	0.264564	0.464139	1	1.59e-27	0.556248	3.55004	0	0	179	179	1.9747	0
Neuroblasts	T cells	Il1rapl1	B2m	0.599504	0.464139	2.5e-19	1.59e-27	0.29647	3.55004	0	0	159	159	1.05248	0
Neuroblasts	T cells	Epha4	Cd247	0.702655	0.776987	7.09e-30	0	0.440014	0.439521	0	0	163	163	0.193395	0
Neuroblasts	T cells	Igf1r	Cd247	0.264564	0.776987	1	0	0.556248	0.439521	0	0	174	174	0.244483	0
Neuroblasts	T cells	Plxna4	Itga4	0.75224	0.946421	1.71e-48	9.04e-224	0.354093	0.634668	0	0	234	234	0.224731	0
Neuroblasts	T cells	Nisch	Itgb1	0.39412	0.212652	1	0.683684	0.919516	0.556815	0	0	238	238	0.512	0
Neuroblasts	T cells	Plxna4	Itgb1	0.75224	0.212652	1.71e-48	0.683684	0.354093	0.556815	0	0	230	230	0.197164	0
Neuroblasts	T cells	Ptprs	Itgb1	1.14572	0.212652	3.15e-76	0.683684	0.832173	0.556815	0	0	220	220	0.463366	0
Neuroblasts	T cells	Rpsa	Itgb1	0.455275	0.212652	1.19e-11	0.683684	2.47458	0.556815	0	0	177	177	1.37788	0
Neuroblasts	T cells	Plxna4	Itgb2	0.75224	0.358083	1.71e-48	1.11e-06	0.354093	0.411177	0	0	162	162	0.145595	0
Neuroblasts	T cells	Ptprs	Itgb2	1.14572	0.358083	3.15e-76	1.11e-06	0.832173	0.411177	0	0	195	195	0.34217	0
Neuroblasts	T cells	Nisch	Itgb7	0.39412	0.615201	1	2.59e-190	0.919516	0.345574	0	0	289	289	0.317761	0
Neuroblasts	T cells	Plxna4	Itgb7	0.75224	0.615201	1.71e-48	2.59e-190	0.354093	0.345574	0	0	159	159	0.122365	0
Neuroblasts	T cells	Ptprs	Itgb7	1.14572	0.615201	3.15e-76	2.59e-190	0.832173	0.345574	0	0	181	181	0.287577	0
Neuron	T cells	Fzd7	Itgb1	0.23006	0.212652	1	0.683684	0.147019	0.556815	0	0	218	218	0.0818621	0
Neuron	T cells	Il11ra1	Itgb2	0.54194	0.358083	1	1.11e-06	0.575901	0.411177	0	0	182	182	0.236797	0
Neuron	T cells	Rorc	Cd160	0.191294	0.558399	0.582253	3.65e-208	0.132283	0.27683	0	0	156	156	0.0366201	0
Neuron	T cells	Rorc	Klrk1	0.191294	1.11257	0.582253	1.94e-263	0.132283	0.524609	0	0	263	263	0.069397	0
Neuron	T cells	Prlr	B2m	0.571455	0.464139	1.3e-63	1.59e-27	0.376989	3.55004	0	0	160	160	1.33833	0
Neuron	T cells	Rorc	B2m	0.191294	0.464139	0.582253	1.59e-27	0.132283	3.55004	0	0	185	185	0.469611	0
Neuron	T cells	Folr1	Cd247	1.66006	0.776987	0	0	1.2801	0.439521	0	0	206	206	0.56263	0
Neuron	T cells	Ntrk2	Cd247	0.415708	0.776987	0.00130917	0	0.688751	0.439521	0	0	155	155	0.30272	0
Neuron	T cells	Rorc	Cd247	0.191294	0.776987	0.582253	0	0.132283	0.439521	0	0	182	182	0.0581413	0
Neuron	T cells	Rorc	Cd3d	0.191294	2.18853	0.582253	0	0.132283	1.89805	0	0	221	221	0.25108	0
Neuron	T cells	Rorc	Cd3e	0.191294	1.79275	0.582253	0	0.132283	1.38202	0	0	298	298	0.182818	0
Neuron	T cells	Rorc	Cd3g	0.191294	2.51845	0.582253	0	0.132283	2.27827	0	0	202	202	0.301377	0
Neuron	T cells	Rorc	Cd8b1	0.191294	2.04039	0.582253	0	0.132283	1.57708	0	0	191	191	0.208621	0
Neuron	T cells	Rorc	Itga4	0.191294	0.946421	0.582253	9.04e-224	0.132283	0.634668	0	0	163	163	0.0839559	0
Neuron	T cells	Prlr	Itgb1	0.571455	0.212652	1.3e-63	0.683684	0.376989	0.556815	0	0	403	403	0.209913	0
Neuron	T cells	Slc22a17	Itgb1	0.887623	0.212652	0.328921	0.683684	0.992774	0.556815	0	0	270	270	0.552791	0
Neuron	T cells	Prlr	Itgb2	0.571455	0.358083	1.3e-63	1.11e-06	0.376989	0.411177	0	0	400	400	0.155009	0
Neuron	T cells	Rorc	Itgb7	0.191294	0.615201	0.582253	2.59e-190	0.132283	0.345574	0	0	192	192	0.0457137	0
Neuron	T cells	Rorc	Klrd1	0.191294	1.07505	0.582253	2e-298	0.132283	0.538661	0	0	299	299	0.0712559	0
Oligodendrocytes	T cells	Itgav	Itgb1	0.153528	0.212652	6.11e-16	0.683684	0.262766	0.556815	0	900	921	991	0.146312	0
Oligodendrocytes	T cells	Itgav	Itgb2	0.153528	0.358083	6.11e-16	1.11e-06	0.262766	0.411177	0	900	702	969	0.108043	0
Oligodendrocytes	T cells	Itgav	Itgb7	0.153528	0.615201	6.11e-16	2.59e-190	0.262766	0.345574	0	800	614	919	0.0908051	0
Oligodendrocytes	T cells	Scarb2	Cd3d	0.386021	2.18853	3.75e-56	0	0.54152	1.89805	0	900	0	900	1.02783	0
Oligodendrocytes	T cells	Scarb2	Cd3g	0.386021	2.51845	3.75e-56	0	0.54152	2.27827	0	900	0	900	1.23373	0
Oligodendrocytes	T cells	Adora1	Itgb1	0.70276	0.212652	5.76e-249	0.683684	0.48128	0.556815	0	0	161	161	0.267984	0
Oligodendrocytes	T cells	Ddr1	Itgb1	1.01999	0.212652	0	0.683684	0.846042	0.556815	0	0	261	261	0.471088	0
Oligodendrocytes	T cells	Erbb3	Itgb1	0.406943	0.212652	1.58e-129	0.683684	0.223577	0.556815	0	0	274	274	0.124491	0
Oligodendrocytes	T cells	Erbb3	Itgb2	0.406943	0.358083	1.58e-129	1.11e-06	0.223577	0.411177	0	0	156	156	0.0919295	0
Oligodendrocytes	T cells	Erbb3	Klrk1	0.406943	1.11257	1.58e-129	1.94e-263	0.223577	0.524609	0	0	158	158	0.11729	0
Oligodendrocytes	T cells	Fgfr2	Itga4	1.09206	0.946421	0	9.04e-224	0.847329	0.634668	0	0	173	173	0.537772	0
Oligodendrocytes	T cells	Fgfr2	Itgb1	1.09206	0.212652	0	0.683684	0.847329	0.556815	0	0	300	300	0.471805	0
Oligodendrocytes	T cells	Fgfr2	Itgb2	1.09206	0.358083	0	1.11e-06	0.847329	0.411177	0	0	241	241	0.348402	0
Oligodendrocytes	T cells	Fgfr2	Itgb7	1.09206	0.615201	0	2.59e-190	0.847329	0.345574	0	0	172	172	0.292815	0
Oligodendrocytes	T cells	Itgav	Klrd1	0.153528	1.07505	6.11e-16	2e-298	0.262766	0.538661	0	0	178	178	0.141542	0
Oligodendrocytes	T cells	Itgav	Klrk1	0.153528	1.11257	6.11e-16	1.94e-263	0.262766	0.524609	0	0	208	208	0.137849	0
Oligodendrocytes	T cells	Itgav	Itga4	0.153528	0.946421	6.11e-16	9.04e-224	0.262766	0.634668	0	720	329	804	0.166769	0
Oligodendrocytes	T cells	Itgb4	Itga4	0.498635	0.946421	1.83e-159	9.04e-224	0.285782	0.634668	0	800	617	920	0.181377	0
Oligodendrocytes	T cells	Itgav	Itgal	0.153528	0.712307	6.11e-16	8.38e-179	0.262766	0.400804	0	900	232	919	0.105318	0
Oligodendrocytes	T cells	Itgb4	Itgal	0.498635	0.712307	1.83e-159	8.38e-179	0.285782	0.400804	0	720	506	856	0.114543	0
Oligodendrocytes	T cells	Itgb4	Itgb1	0.498635	0.212652	1.83e-159	0.683684	0.285782	0.556815	0	900	157	912	0.159128	0
Oligodendrocytes	T cells	Itgb4	Itgb2	0.498635	0.358083	1.83e-159	1.11e-06	0.285782	0.411177	0	720	129	745	0.117507	0
Oligodendrocytes	T cells	Itgb4	Itgb7	0.498635	0.615201	1.83e-159	2.59e-190	0.285782	0.345574	0	720	110	740	0.0987589	0
Oligodendrocytes	T cells	Erbb3	B2m	0.406943	0.464139	1.58e-129	1.59e-27	0.223577	3.55004	0	0	173	173	0.793705	0
Oligodendrocytes	T cells	Fgfr2	B2m	1.09206	0.464139	0	1.59e-27	0.847329	3.55004	0	0	151	151	3.00805	0
Oligodendrocytes	T cells	Itgav	B2m	0.153528	0.464139	6.11e-16	1.59e-27	0.262766	3.55004	0	0	196	196	0.932829	0
Oligodendrocytes	T cells	Sort1	B2m	0.621734	0.464139	7.72e-157	1.59e-27	0.596731	3.55004	0	0	178	178	2.11842	0
Oligodendrocytes	T cells	Sra1	B2m	0.140583	0.464139	5.9e-17	1.59e-27	0.469409	3.55004	0	0	265	265	1.66642	0
Oligodendrocytes	T cells	Ephb1	Cd247	0.704198	0.776987	2.1e-239	0	0.478347	0.439521	0	0	155	155	0.210244	0
Oligodendrocytes	T cells	Ptprf	Cd247	0.202516	0.776987	1.02e-46	0	0.149413	0.439521	0	0	199	199	0.0656702	0
Oligodendrocytes	T cells	Ptprk	Cd247	0.263403	0.776987	3.22e-60	0	0.21926	0.439521	0	0	157	157	0.0963693	0
Oligodendrocytes	T cells	Tyro3	Cd247	0.768839	0.776987	5.63e-275	0	0.519124	0.439521	0	0	231	231	0.228166	0
Oligodendrocytes	T cells	Il1rap	Cd3e	0.556272	1.79275	2.83e-181	0	0.358209	1.38202	0	0	176	176	0.495052	0
Oligodendrocytes	T cells	Itgav	Cd3e	0.153528	1.79275	6.11e-16	0	0.262766	1.38202	0	0	205	205	0.363148	0
Oligodendrocytes	T cells	Plxnb3	Itgb1	0.44116	0.212652	4.09e-138	0.683684	0.252147	0.556815	0	0	168	168	0.140399	0
Oligodendrocytes	T cells	Ptprd	Itgb1	1.63428	0.212652	0	0.683684	1.45029	0.556815	0	0	220	220	0.807542	0
Oligodendrocytes	T cells	Ptprf	Itgb1	0.202516	0.212652	1.02e-46	0.683684	0.149413	0.556815	0	0	225	225	0.0831954	0
Oligodendrocytes	T cells	Slc22a17	Itgb1	0.24999	0.212652	3.77e-42	0.683684	0.441998	0.556815	0	0	270	270	0.246111	0
Oligodendrocytes	T cells	Unc5b	Itgb1	0.762453	0.212652	4.16e-256	0.683684	0.581081	0.556815	0	0	214	214	0.323554	0
Oligodendrocytes	T cells	Plxnb3	Itgb2	0.44116	0.358083	4.09e-138	1.11e-06	0.252147	0.411177	0	0	162	162	0.103677	0
Oligodendrocytes	T cells	Ptprd	Itgb2	1.63428	0.358083	0	1.11e-06	1.45029	0.411177	0	0	195	195	0.596325	0
Oligodendrocytes	T cells	Ptprf	Itgb2	0.202516	0.358083	1.02e-46	1.11e-06	0.149413	0.411177	0	0	195	195	0.0614352	0
Oligodendrocytes	T cells	Plxnb3	Itgb7	0.44116	0.615201	4.09e-138	2.59e-190	0.252147	0.345574	0	0	159	159	0.0871354	0
Oligodendrocytes	T cells	Ptprd	Itgb7	1.63428	0.615201	0	2.59e-190	1.45029	0.345574	0	0	181	181	0.501182	0
Oligodendrocytes	T cells	Ptprf	Itgb7	0.202516	0.615201	1.02e-46	2.59e-190	0.149413	0.345574	0	0	213	213	0.0516333	0
Oligodendrocytes	T cells	S1pr5	Klrd1	0.848704	1.07505	0	2e-298	0.546539	0.538661	0	0	159	159	0.294399	0
OPCs	T cells	Itgav	Itgb1	1.00044	0.212652	2.15e-16	0.683684	0.879292	0.556815	0	900	921	991	0.489603	0
OPCs	T cells	Itgav	Itgb2	1.00044	0.358083	2.15e-16	1.11e-06	0.879292	0.411177	0	900	702	969	0.361545	0
OPCs	T cells	Itgav	Itgb7	1.00044	0.615201	2.15e-16	2.59e-190	0.879292	0.345574	0	800	614	919	0.30386	0
OPCs	T cells	Ackr3	Itga4	0.24102	0.946421	0.475151	9.04e-224	0.242015	0.634668	0	0	179	179	0.153599	0
OPCs	T cells	Ackr3	Itgb1	0.24102	0.212652	0.475151	0.683684	0.242015	0.556815	0	0	250	250	0.134757	0
OPCs	T cells	Adora1	Itgb1	1.03705	0.212652	3.16e-13	0.683684	0.835102	0.556815	0	0	161	161	0.464997	0
OPCs	T cells	Csf2ra	Itgal	0.342887	0.712307	1	8.38e-179	0.429528	0.400804	0	0	167	167	0.172157	0
OPCs	T cells	Csf2ra	Itgb1	0.342887	0.212652	1	0.683684	0.429528	0.556815	0	0	201	201	0.239168	0
OPCs	T cells	Csf2ra	Itgb2	0.342887	0.358083	1	1.11e-06	0.429528	0.411177	0	0	307	307	0.176612	0
OPCs	T cells	Csf2ra	Klrd1	0.342887	1.07505	1	2e-298	0.429528	0.538661	0	0	188	188	0.23137	0
OPCs	T cells	Erbb3	Itgb1	0.374251	0.212652	1	0.683684	0.23581	0.556815	0	0	274	274	0.131302	0
OPCs	T cells	Erbb3	Itgb2	0.374251	0.358083	1	1.11e-06	0.23581	0.411177	0	0	156	156	0.0969594	0
OPCs	T cells	Erbb3	Klrk1	0.374251	1.11257	1	1.94e-263	0.23581	0.524609	0	0	158	158	0.123708	0
OPCs	T cells	Erbb4	Itgb1	0.365603	0.212652	2.86e-09	0.683684	0.234539	0.556815	0	0	253	253	0.130595	0
OPCs	T cells	Erbb4	Itgb2	0.365603	0.358083	2.86e-09	1.11e-06	0.234539	0.411177	0	0	190	190	0.0964369	0
OPCs	T cells	Fgfr1	Itga4	0.238015	0.946421	1	9.04e-224	0.214878	0.634668	0	0	160	160	0.136376	0
OPCs	T cells	Fgfr1	Itgb1	0.238015	0.212652	1	0.683684	0.214878	0.556815	0	0	349	349	0.119647	0
OPCs	T cells	Fgfr1	Itgb2	0.238015	0.358083	1	1.11e-06	0.214878	0.411177	0	0	167	167	0.088353	0
OPCs	T cells	Fgfr1	Itgb7	0.238015	0.615201	1	2.59e-190	0.214878	0.345574	0	0	196	196	0.0742564	0
OPCs	T cells	Fzd9	Itgb1	0.895765	0.212652	6.13e-140	0.683684	0.551765	0.556815	0	0	236	236	0.307231	0
OPCs	T cells	Gfra1	Itgb1	0.582319	0.212652	3.34e-17	0.683684	0.395963	0.556815	0	0	236	236	0.220478	0
OPCs	T cells	Gria2	Itgb1	1.74635	0.212652	3.61e-153	0.683684	1.84731	0.556815	0	0	220	220	1.02861	0
OPCs	T cells	Gria2	Itgb2	1.74635	0.358083	3.61e-153	1.11e-06	1.84731	0.411177	0	0	158	158	0.759571	0
OPCs	T cells	Gria4	Itgb1	0.594367	0.212652	1.62e-28	0.683684	0.345129	0.556815	0	0	181	181	0.192173	0
OPCs	T cells	Gria4	Itgb2	0.594367	0.358083	1.62e-28	1.11e-06	0.345129	0.411177	0	0	156	156	0.141909	0
OPCs	T cells	Insr	Itgb1	0.304535	0.212652	1	0.683684	0.300712	0.556815	0	0	265	265	0.167441	0
OPCs	T cells	Itgav	Klrd1	1.00044	1.07505	2.15e-16	2e-298	0.879292	0.538661	0	0	178	178	0.47364	0
OPCs	T cells	Itgav	Klrk1	1.00044	1.11257	2.15e-16	1.94e-263	0.879292	0.524609	0	0	208	208	0.461285	0
OPCs	T cells	Ltbr	Cd160	0.235679	0.558399	1	3.65e-208	0.248435	0.27683	0	0	260	260	0.0687743	0
OPCs	T cells	Notch1	Klrk1	0.378885	1.11257	0.507839	1.94e-263	0.406303	0.524609	0	0	152	152	0.21315	0
OPCs	T cells	Itga9	Itga4	0.326822	0.946421	1.94e-17	9.04e-224	0.167917	0.634668	0	720	75	729	0.106572	0
OPCs	T cells	Itgav	Itga4	1.00044	0.946421	2.15e-16	9.04e-224	0.879292	0.634668	0	720	329	804	0.558058	0
OPCs	T cells	Itga9	Itgal	0.326822	0.712307	1.94e-17	8.38e-179	0.167917	0.400804	0	720	91	734	0.067302	0
OPCs	T cells	Itgav	Itgal	1.00044	0.712307	2.15e-16	8.38e-179	0.879292	0.400804	0	900	232	919	0.352424	0
OPCs	T cells	Itga9	Itgb1	0.326822	0.212652	1.94e-17	0.683684	0.167917	0.556815	0	900	818	981	0.0934989	0
OPCs	T cells	Itga9	Itgb2	0.326822	0.358083	1.94e-17	1.11e-06	0.167917	0.411177	0	720	637	894	0.0690437	0
OPCs	T cells	Itga9	Itgb7	0.326822	0.615201	1.94e-17	2.59e-190	0.167917	0.345574	0	800	749	947	0.0580279	0
OPCs	T cells	Ackr3	B2m	0.24102	0.464139	0.475151	1.59e-27	0.242015	3.55004	0	0	157	157	0.859162	0
OPCs	T cells	Erbb3	B2m	0.374251	0.464139	1	1.59e-27	0.23581	3.55004	0	0	173	173	0.837133	0
OPCs	T cells	Fgfr1	B2m	0.238015	0.464139	1	1.59e-27	0.214878	3.55004	0	0	180	180	0.762826	0
OPCs	T cells	Il1rapl1	B2m	0.61616	0.464139	4.19e-14	1.59e-27	0.35949	3.55004	0	0	159	159	1.2762	0
OPCs	T cells	Itgav	B2m	1.00044	0.464139	2.15e-16	1.59e-27	0.879292	3.55004	0	0	196	196	3.12152	0
OPCs	T cells	Notch1	B2m	0.378885	0.464139	0.507839	1.59e-27	0.406303	3.55004	0	0	236	236	1.44239	0
OPCs	T cells	Pdgfra	B2m	2.72097	0.464139	0	1.59e-27	2.50987	3.55004	0	0	201	201	8.91015	0
OPCs	T cells	Csf2ra	Cd247	0.342887	0.776987	1	0	0.429528	0.439521	0	0	191	191	0.188787	0
OPCs	T cells	Epha5	Cd247	0.899372	0.776987	8.31e-128	0	0.552661	0.439521	0	0	155	155	0.242906	0
OPCs	T cells	Insr	Cd247	0.304535	0.776987	1	0	0.300712	0.439521	0	0	177	177	0.132169	0
OPCs	T cells	Ntrk2	Cd247	0.912664	0.776987	1.2e-44	0	1.17308	0.439521	0	0	155	155	0.515594	0
OPCs	T cells	Ntrk3	Cd247	0.917597	0.776987	2.23e-203	0	0.551448	0.439521	0	0	155	155	0.242373	0
OPCs	T cells	Ptk7	Cd247	0.354478	0.776987	3.4e-11	0	0.177873	0.439521	0	0	172	172	0.0781789	0
OPCs	T cells	Ptprt	Cd247	0.432957	0.776987	3.14e-19	0	0.21984	0.439521	0	0	150	150	0.0966244	0
OPCs	T cells	Csf2ra	Cd3e	0.342887	1.79275	1	0	0.429528	1.38202	0	0	286	286	0.593616	0
OPCs	T cells	Itgav	Cd3e	1.00044	1.79275	2.15e-16	0	0.879292	1.38202	0	0	205	205	1.2152	0
OPCs	T cells	Notch1	Cd3e	0.378885	1.79275	0.507839	0	0.406303	1.38202	0	0	182	182	0.561518	0
OPCs	T cells	Dner	Itga4	0.778101	0.946421	9.51e-90	9.04e-224	0.480961	0.634668	0	0	155	155	0.30525	0
OPCs	T cells	Gpr17	Itga4	1.85077	0.946421	0	9.04e-224	1.35732	0.634668	0	0	447	447	0.861449	0
OPCs	T cells	Lrp1	Itga4	1.56036	0.946421	9.26e-52	9.04e-224	1.62523	0.634668	0	0	223	223	1.03148	0
OPCs	T cells	Ltbr	Itga4	0.235679	0.946421	1	9.04e-224	0.248435	0.634668	0	0	265	265	0.157673	0
OPCs	T cells	Notch1	Itga4	0.378885	0.946421	0.507839	9.04e-224	0.406303	0.634668	0	0	232	232	0.257867	0
OPCs	T cells	Pdgfra	Itga4	2.72097	0.946421	0	9.04e-224	2.50987	0.634668	0	0	258	258	1.59294	0
OPCs	T cells	Plxnb1	Itga4	0.170036	0.946421	1	9.04e-224	0.186154	0.634668	0	0	159	159	0.118146	0
OPCs	T cells	Ptk7	Itga4	0.354478	0.946421	3.4e-11	9.04e-224	0.177873	0.634668	0	0	242	242	0.11289	0
OPCs	T cells	Gpr17	Itgal	1.85077	0.712307	0	8.38e-179	1.35732	0.400804	0	0	311	311	0.544021	0
OPCs	T cells	Lrp1	Itgal	1.56036	0.712307	9.26e-52	8.38e-179	1.62523	0.400804	0	0	208	208	0.6514	0
OPCs	T cells	Notch1	Itgal	0.378885	0.712307	0.507839	8.38e-179	0.406303	0.400804	0	0	151	151	0.162848	0
OPCs	T cells	Gpr17	Itgb1	1.85077	0.212652	0	0.683684	1.35732	0.556815	0	0	173	173	0.755778	0
OPCs	T cells	Grm5	Itgb1	1.00891	0.212652	0	0.683684	0.633805	0.556815	0	0	402	402	0.352912	0
OPCs	T cells	Lrp1	Itgb1	1.56036	0.212652	9.26e-52	0.683684	1.62523	0.556815	0	0	503	503	0.904953	0
OPCs	T cells	Lrp6	Itgb1	0.293152	0.212652	1	0.683684	0.29354	0.556815	0	0	153	153	0.163447	0
OPCs	T cells	Ltbr	Itgb1	0.235679	0.212652	1	0.683684	0.248435	0.556815	0	0	236	236	0.138332	0
OPCs	T cells	Nisch	Itgb1	0.43007	0.212652	1	0.683684	1.0272	0.556815	0	0	238	238	0.57196	0
OPCs	T cells	Notch1	Itgb1	0.378885	0.212652	0.507839	0.683684	0.406303	0.556815	0	0	399	399	0.226235	0
OPCs	T cells	Pdgfra	Itgb1	2.72097	0.212652	0	0.683684	2.50987	0.556815	0	0	516	516	1.39753	0
OPCs	T cells	Plxnb1	Itgb1	0.170036	0.212652	1	0.683684	0.186154	0.556815	0	0	175	175	0.103653	0
OPCs	T cells	Ptk7	Itgb1	0.354478	0.212652	3.4e-11	0.683684	0.177873	0.556815	0	0	154	154	0.0990422	0
OPCs	T cells	Ptpro	Itgb1	0.323489	0.212652	0.518257	0.683684	0.213982	0.556815	0	0	168	168	0.119149	0
OPCs	T cells	Ptprs	Itgb1	1.04116	0.212652	5.62e-40	0.683684	0.85253	0.556815	0	0	220	220	0.474701	0
OPCs	T cells	Slc22a17	Itgb1	0.969514	0.212652	1.08e-18	0.683684	1.13282	0.556815	0	0	270	270	0.630771	0
OPCs	T cells	Grm5	Itgb2	1.00891	0.358083	0	1.11e-06	0.633805	0.411177	0	0	315	315	0.260606	0
OPCs	T cells	Ltbr	Itgb2	0.235679	0.358083	1	1.11e-06	0.248435	0.411177	0	0	216	216	0.102151	0
OPCs	T cells	Pdgfra	Itgb2	2.72097	0.358083	0	1.11e-06	2.50987	0.411177	0	0	213	213	1.032	0
OPCs	T cells	Plxnb1	Itgb2	0.170036	0.358083	1	1.11e-06	0.186154	0.411177	0	0	152	152	0.0765423	0
OPCs	T cells	Ptprs	Itgb2	1.04116	0.358083	5.62e-40	1.11e-06	0.85253	0.411177	0	0	195	195	0.350541	0
OPCs	T cells	Ltbr	Itgb7	0.235679	0.615201	1	2.59e-190	0.248435	0.345574	0	0	387	387	0.0858526	0
OPCs	T cells	Nisch	Itgb7	0.43007	0.615201	1	2.59e-190	1.0272	0.345574	0	0	289	289	0.354973	0
OPCs	T cells	Plxnb1	Itgb7	0.170036	0.615201	1	2.59e-190	0.186154	0.345574	0	0	152	152	0.06433	0
OPCs	T cells	Ptprs	Itgb7	1.04116	0.615201	5.62e-40	2.59e-190	0.85253	0.345574	0	0	181	181	0.294612	0
OPCs	T cells	Robo1	Itgb7	0.295321	0.615201	6.84e-08	2.59e-190	0.166913	0.345574	0	0	151	151	0.0576809	0
OPCs	T cells	Lrp1	Klrd1	1.56036	1.07505	9.26e-52	2e-298	1.62523	0.538661	0	0	234	234	0.875449	0
