# Supplementary material for: Aged microglia promote peripheral T cell infiltration by reprogramming the microenvironment of neurogenic niches
Source: Immun Ageing. 2022 Jul 25;19:34. doi: 10.1186/s12979-022-00289-6 (PMC9310471; doi:10.1186/s12979-022-00289-6)
Supplement: Supplementary file 5 — Additional file 5: Supplementary Table 4. Marker genes of brain endothelial cells from different vascular segments. [file 12979_2022_289_MOESM5_ESM.xlsx]

## Sheet: top500_ae
Supplementary Table 4 | Marker genes of brain endothelial cells from different vascular segments.
gene name	expression level_ Capillary	expression level_ Artery	expression level_Vein	expression level_ sum	group
Fth1	29.6027	34.9873	85.3131	149.903	Vein
Mt1	26.9577	6.438	20.3652	53.7609	Capillary
Cxcl12	25.3562	16.4203	4.10616	45.8827	Capillary
Tmsb10	22.5897	1.71808	53.4386	77.7464	Vein
Hdac11	0.0275569	0.10379	0	0.131347	Artery
Ctla2a	11.9406	1.63761	15.4652	29.0434	Vein
Car4	11.9342	0.391955	11.5418	23.868	Capillary
Rgcc	9.10956	4.08058	2.62569	15.8158	Capillary
Slc22a4	0.00464666	0.107884	0	0.112531	Artery
Npr2	0.0686324	0.116479	0.0390539	0.224166	Artery
Creb5	0.0336519	0.12818	0	0.161832	Artery
Dusp2	0.0505633	0.130449	0.043328	0.22434	Artery
Synpo	0.0255702	0.133556	0.0730916	0.232218	Artery
Hbb-bs	3.81504	1.45725	1.34638	6.61867	Capillary
Slc7a1	3.80556	1.38898	2.32829	7.52283	Capillary
Itih5	3.64182	2.53335	6.31188	12.4871	Vein
Slc12a8	0.00456534	0.139015	0.0586698	0.20225	Artery
Tmem252	3.03958	2.64598	8.77486	14.4604	Vein
Ier3	2.9531	1.74321	7.63594	12.3322	Vein
Tgm2	2.9411	2.10846	6.77294	11.8225	Vein
Serpini1	0.0229218	0.145701	0.0177154	0.186338	Artery
Slc16a1	2.76844	0.449045	2.26754	5.48502	Capillary
Stx11	0.0109311	0.152756	0.0564716	0.220159	Artery
Slc38a5	2.37838	0.0593389	8.34068	10.7784	Vein
Polk	2.28498	0.976348	3.51148	6.7728	Vein
Slc1a1	2.11992	0.880335	0.763707	3.76397	Capillary
Dusp26	0.0440133	0.155374	0.0340367	0.233424	Artery
Vwf	1.88074	2.04215	6.63887	10.5618	Vein
Apod	1.81876	0.470351	7.05403	9.34314	Vein
Scara3	0.00690767	0.191275	0	0.198183	Artery
Rbp1	1.69302	0.153289	3.43011	5.27641	Vein
Ivns1abp	1.66552	0.509183	0.315298	2.49	Capillary
Ttyh2	1.6546	0.256341	1.18655	3.09749	Capillary
Rnase4	1.5481	0.276944	2.43667	4.26172	Vein
Pmaip1	1.53074	0.323471	0.411756	2.26597	Capillary
Hba-a1	1.38784	0.464171	0.606648	2.45866	Capillary
Gda	0.00660861	0.200112	0.00675354	0.213474	Artery
Anxa1	0.044449	0.202356	0.139882	0.386687	Artery
Net1	1.34562	0.553721	2.63817	4.53752	Vein
Ntn1	0.0256646	0.205369	0.109831	0.340864	Artery
Stc1	0	0.213514	0	0.213514	Artery
Gm9946	1.2015	0.924559	0.0516017	2.17766	Capillary
Cpe	1.174	0.213387	1.99017	3.37756	Vein
Hba-a2	1.13658	0.444798	0.407286	1.98866	Capillary
Pthlh	0.0108411	0.217736	0	0.228577	Artery
Efhd1	0.0403578	0.219346	0.0174464	0.277151	Artery
Hs3st1	1.03249	0.324785	2.28247	3.63975	Vein
Fmo2	0.972426	0.227048	1.23582	2.43529	Vein
Cfh	0.863742	0.828025	6.37122	8.06298	Vein
Gcnt1	0.0395023	0.230585	0.0215626	0.29165	Artery
Ndnf	0.831298	0.0967972	1.02449	1.95258	Vein
Sh3kbp1	0.0796548	0.235148	0.0609446	0.375747	Artery
Tubb6	0.129525	0.252173	0.0740904	0.455789	Artery
S100a4	0	0.253425	0.0224151	0.27584	Artery
Car7	0.00555858	0.26222	0.0345334	0.302312	Artery
Col14a1	0.0335023	0.269969	0.0444568	0.347928	Artery
Fam198b	0.0523512	0.272604	0.0179049	0.34286	Artery
Zeb2	0.0890394	0.276701	0.0683283	0.434068	Artery
Nuak1	0.0537375	0.280833	0.0373739	0.371945	Artery
Mndal	0.0790335	0.282589	0.0386268	0.400249	Artery
Car14	0.652305	0.0745426	1.57467	2.30152	Vein
Arhgef28	0.187757	0.294478	0.0313862	0.513621	Artery
Nov	0.024035	0.302679	0	0.326714	Artery
Atp2a3	0.0423917	0.312853	0.00788663	0.363132	Artery
Wnt5b	0.0722055	0.313886	0.0539264	0.440018	Artery
1700025G04Rik	0.0228874	0.315086	0	0.337973	Artery
Mcam	0.0294987	0.316756	0.00675354	0.353008	Artery
Phlda3	0.121696	0.317579	0.0508072	0.490082	Artery
Cited4	0.53609	0.2047	0.227172	0.967963	Capillary
Ifit2	0.103303	0.320889	0.0425217	0.466713	Artery
Adarb1	0.104719	0.337951	0.0644789	0.507149	Artery
Rgs5	0.218601	0.356137	0.127846	0.702584	Artery
Syt15	0.00803251	0.372909	0.00774282	0.388684	Artery
Adm	0.479734	0.0693675	0.210737	0.759838	Capillary
Atp2b4	0.00514389	0.37732	0	0.382464	Artery
Ccdc184	0.0879836	0.383324	0.0196156	0.490923	Artery
Ldb2	0.00340786	0.38688	0.00572177	0.39601	Artery
Cmip	0.0499108	0.412744	0.0717069	0.534361	Artery
Npnt	0.00880236	0.416057	0.026241	0.4511	Artery
Dbndd2	0.132268	0.41764	0.134397	0.684306	Artery
Cytl1	0	0.433903	0	0.433903	Artery
Gnpnat1	0.244862	0.438464	0.0814813	0.764807	Artery
Emp1	0.0208189	0.465802	0.0362013	0.522822	Artery
Mylk	0.0501152	0.466815	0.100719	0.617649	Artery
Zap70	0.193416	0.47383	0.241931	0.909177	Artery
Phf11d	0.230151	0.483706	0.116751	0.830608	Artery
Vwa3a	0.341437	0.113691	0.227293	0.68242	Capillary
Wnt5a	0.332873	0.186507	1.58776	2.10714	Vein
Prpf40b	0.313668	0.270255	1.11459	1.69851	Vein
Ssu2	0.00625315	0.500222	0	0.506475	Artery
Uchl1	0.0505869	0.51518	0.114398	0.680164	Artery
Ctgf	0.300718	0.0864144	0.131172	0.518305	Capillary
Angpt2	0.282668	0.11566	0.0141736	0.412502	Capillary
Nos1	0.0188596	0.52774	0.00774282	0.554343	Artery
Crispld1	0.041988	0.528321	0.0672369	0.637546	Artery
Tcea3	0.262767	0.0554496	0.503145	0.821362	Vein
Ch25h	0.261986	0.169479	2.82473	3.25619	Vein
Ifi203	0.104353	0.534313	0.0894576	0.728123	Artery
Timp2	0.154602	0.534795	0.241826	0.931224	Artery
Syt11	0.253388	0.543975	0.245111	1.04247	Artery
Tspan2	0.075493	0.56491	0.0696116	0.710015	Artery
Fxyd6	0.242896	0.0361689	1.7092	1.98826	Vein
C1qtnf9	0.0429753	0.569119	0	0.612094	Artery
Meox1	0.23651	0	0.00890009	0.24541	Capillary
Fhl1	0.0313374	0.577703	0.0278396	0.63688	Artery
Pfkp	0.127275	0.590247	0.10242	0.819942	Artery
Rcn3	0.218957	0.600189	0.159541	0.978687	Artery
Ace	0.0631452	0.600763	0.108613	0.772521	Artery
Tppp3	0.180971	0.613717	0.203928	0.998616	Artery
1810011O10Rik	0.439836	0.632211	0.167827	1.23987	Artery
Trpv4	0.0906146	0.637603	0.0700098	0.798228	Artery
Emp3	0.0565893	0.643944	0.384838	1.08537	Artery
Sfi1	0.207577	0.0967179	0.377664	0.681959	Vein
Cyp26b1	0.206385	0.152273	0.0458138	0.404471	Capillary
Tbxa2r	0.31033	0.657044	0.01631	0.983684	Artery
Nr2f2	0.205918	0.00615159	1.01602	1.22809	Vein
Auts2	0.200047	0.187072	0.497953	0.885072	Vein
Igfbp4	0.00362373	0.664742	0.0496419	0.718008	Artery
Akr1c14	0.426947	0.68155	0.0312526	1.13975	Artery
Lcn2	0.192961	0.0700049	9.29384	9.5568	Vein
Krtap28-13	0.197956	0.686455	0.113104	0.997515	Artery
Fez1	0.301234	0.712323	0.166418	1.17997	Artery
Tubb2b	0.220169	0.722009	0.120123	1.0623	Artery
Marcks	0.359613	0.735593	0.363721	1.45893	Artery
Vcam1	0.163677	1.17122	9.25612	10.591	Vein
Icam1	0.160193	0.0519625	1.81304	2.02519	Vein
Pdlim2	0.153949	0.742594	0.167375	1.06392	Artery
Cd24a	0.0852552	0.82409	0.0886048	0.99795	Artery
Ccnd1	0.222391	0.827317	0.210966	1.26067	Artery
Gja1	0.404082	0.82885	0.183878	1.41681	Artery
Nsg1	0.153394	0.0443814	0.607128	0.804903	Vein
Ptgs2	0.152081	0.0881803	1.13166	1.37192	Vein
Laptm5	0.218485	0.85479	0.233678	1.30695	Artery
Vcl	0.497521	0.963586	0.44789	1.909	Artery
Unc5b	0.217142	0.965052	0.0447915	1.22699	Artery
Nr4a2	0.157519	0.965779	0.219424	1.34272	Artery
Gper1	0.0405268	0.973009	0	1.01354	Artery
Asb4	0.282108	0.9742	0.244689	1.501	Artery
Rgs16	0.126191	0.177391	0.782191	1.08577	Vein
Il1r1	0.125698	0.0380309	1.46929	1.63302	Vein
Gm4951	0.12461	0.172386	0.36986	0.666856	Vein
Cald1	0.560727	0.978616	0.183215	1.72256	Artery
Islr2	0.252121	0.991982	0	1.2441	Artery
Lrg1	0.112388	0.0572239	8.03295	8.20256	Vein
Fgfbp1	0.105483	0.00878766	0.0335808	0.147852	Capillary
Cdh13	0.0703019	1.00144	0	1.07175	Artery
Kazald1	0.132747	1.00325	0.0737715	1.20977	Artery
Adrb2	0.586255	1.02312	0.319776	1.92915	Artery
Sncg	0.102417	1.06779	0.0891292	1.25934	Artery
Fbln5	0	1.14148	0	1.14148	Artery
Nfkb2	0.100117	0.0851053	0.328342	0.513565	Vein
Il17ra	0.0981864	0.0799187	0.351485	0.52959	Vein
Arid5a	0.449856	1.1506	0.284506	1.88496	Artery
Aif1l	0.367914	1.15442	0.133168	1.65551	Artery
Lmcd1	0.435467	1.15942	0.469499	2.06439	Artery
Lrrc32	0.0874567	1.16546	0.103963	1.35688	Artery
Phlda1	0.0859718	0.0419436	0.356145	0.484061	Vein
Nrarp	0.266364	1.23251	0.244686	1.74356	Artery
Nkd2	0.0816884	0.0427977	0.387797	0.512283	Vein
Cx3cl1	0.534438	1.23614	0.561033	2.33161	Artery
Pi16	0	1.33886	0.0147239	1.35358	Artery
Lcp1	0.078868	0.111994	0.425337	0.616199	Vein
Pdgfa	0.206378	1.35311	0.48427	2.04376	Artery
Fbln2	0.0715361	1.37233	0	1.44386	Artery
Plpp1	0.538429	1.37585	0.616547	2.53083	Artery
Eln	0.239898	1.3962	0.720551	2.35665	Artery
Slc26a10	0.726812	1.40421	0.255936	2.38696	Artery
F5	0.0685868	0	0.172332	0.240919	Vein
Dnajc27	0.0646333	0.0373174	0.180353	0.282304	Vein
Prune2	0.141925	1.40804	0.01999	1.56995	Artery
Cd14	0.0593959	0.0584995	0.348139	0.466035	Vein
Igfbp3	0.0220885	1.42625	0.00893879	1.45728	Artery
Shisa4	0.058676	0.0527578	0.124748	0.236181	Vein
Msx1	0.158556	1.46792	0.0900099	1.71649	Artery
Lmna	0.697888	1.5009	0.595905	2.79469	Artery
Gja4	0.0503086	1.50915	0.00825148	1.56771	Artery
Mall	0.44615	1.62284	0.339387	2.40837	Artery
Gm26522	0.0516546	0.00847971	0.335224	0.395358	Vein
Cenpj	0.0515436	0.0409079	0.122703	0.215155	Vein
Dll4	0.726534	1.67055	0.137081	2.53417	Artery
Jag1	0.607938	1.67987	0.529802	2.81761	Artery
Mgll	0.69115	1.72833	0.220811	2.64029	Artery
Mgst1	0.259724	1.75184	0.50015	2.51172	Artery
Rad54b	0.514532	1.78071	0.0354045	2.33064	Artery
Ifitm1	0.0471378	0.0439262	0.366956	0.45802	Vein
Tbc1d2	0.0466149	0.0982873	0.147322	0.292225	Vein
Epb41l3	0.0463219	0.0393362	0.118949	0.204607	Vein
Gm3764	0.046175	0.0970475	0.177017	0.320239	Vein
Sema3g	0.23078	1.79237	0	2.02315	Artery
Lypd1	0.11458	1.88811	0.010948	2.01364	Artery
Edn3	0.82186	2.03912	1.16805	4.02903	Artery
Tmem100	0.0559077	2.06203	0.182588	2.30053	Artery
Nr4a1	0.582895	2.1015	0.541312	3.22571	Artery
Tgfb2	0.754276	2.19768	0.573824	3.52578	Artery
Vegfc	0.058908	2.34624	0.0674852	2.47263	Artery
S100a6	0.104925	2.35536	0.0753993	2.53568	Artery
Tnfaip3	0.0361838	0.032255	0.192522	0.26096	Vein
Cdk19	0.462946	2.47158	0.261952	3.19648	Artery
Bmx	0.171898	2.55254	0.15349	2.87793	Artery
Plekho1	0.0330059	0.0693186	0.219479	0.321803	Vein
Eps8l2	0.710926	2.63685	0.770441	4.11822	Artery
Ccnd2	0.49159	2.72858	0.384988	3.60516	Artery
Rasd1	0.682428	2.77126	1.18941	4.6431	Artery
Hrct1	1.38356	2.78714	0.76149	4.93219	Artery
Egfl8	0.136967	2.83044	0.140299	3.10771	Artery
Cyb5r3	1.37571	2.96822	1.16735	5.51128	Artery
Cdkn1c	1.09624	3.04688	0.19818	4.3413	Artery
Ifi27l2a	0.566607	3.115	2.04216	5.72377	Artery
Mmrn2	1.03816	3.30539	1.32307	5.66662	Artery
Adamts1	1.26305	3.58242	1.43484	6.28031	Artery
Tubb2a	1.78522	3.60351	1.67791	7.06665	Artery
Gm5127	0.0143984	0	0.593274	0.607672	Vein
Hey1	0.678392	3.61098	0.0366938	4.32607	Artery
Azin1	0.458961	3.8808	0.221747	4.56151	Artery
Cxcl1	0.009242	0.0141874	0.206674	0.230103	Vein
Plk2	2.8228	4.18645	0.877947	7.8872	Artery
Cd9	0.836784	4.54532	2.87228	8.25438	Artery
Clu	0.165846	5.12812	0.263117	5.55708	Artery
Alpl	1.23163	5.61316	0.0928591	6.93765	Artery
Spint2	0.00657099	0.100282	0.297826	0.404679	Vein
Amd1	1.57017	5.85631	0.797221	8.22371	Artery
Prss23	2.08934	5.91711	2.60779	10.6142	Artery
Stmn2	0.558711	6.12462	0.152099	6.83543	Artery
Ltbp4	2.65865	6.15731	2.10504	10.921	Artery
S100a11	3.31505	7.4505	3.65563	14.4212	Artery
8430408G22Rik	4.13813	8.20823	3.15635	15.5027	Artery
Timp3	4.82413	12.4669	3.03423	20.3252	Artery
Gkn3	0.452953	15.4728	0.0773442	16.0031	Artery
Crip1	8.37452	16.4749	5.66134	30.5108	Artery
Edn1	8.14804	17.3341	4.25792	29.7401	Artery
Mgp	0.444004	20.1607	3.44636	24.0511	Artery
Tm4sf1	6.80752	24.7965	4.63849	36.2425	Artery
Glul	12.5584	29.2212	6.0279	47.8075	Artery
