# Supplementary material for: Aged microglia promote peripheral T cell infiltration by reprogramming the microenvironment of neurogenic niches
Source: Immun Ageing. 2022 Jul 25;19:34. doi: 10.1186/s12979-022-00289-6 (PMC9310471; doi:10.1186/s12979-022-00289-6)
Supplement: Supplementary file 6 — Additional file 6: Supplementary Table 5. Differentially expressed genes (CSF treated microglia vs PBS treated microglia). [file 12979_2022_289_MOESM6_ESM.xlsx]

## Sheet: DEG_DESeq2
Supplementary Table 5 Differentially expressed genes (CSF treated microglia vs PBS treated microglia)
gene_id	baseMean	log2FoldChange	lfcSE	stat	pvalue	padj	gene_name
ENSG00000182158	10279.5	2.40186	0.0946291	25.3818	4e-142	6.77e-138	CREB3L2
ENSG00000112394	5684.08	1.38731	0.0892901	15.5371	1.95e-54	1.65e-50	SLC16A10
ENSG00000171155	918.971	2.35117	0.165241	14.2288	6.07e-46	3.43e-42	C1GALT1C1
ENSG00000141337	962.784	2.07437	0.154003	13.4697	2.36e-41	9.98e-38	ARSG
ENSG00000196664	1134.41	-1.72831	0.128781	-13.4205	4.59e-41	1.55e-37	TLR7
ENSG00000148773	4063.88	-2.21611	0.165861	-13.3613	1.02e-40	2.87e-37	MKI67
ENSG00000112715	4408.16	1.26587	0.109535	11.5567	6.83e-31	1.65e-27	VEGFA
ENSG00000131747	1495.23	-2.37964	0.219755	-10.8286	2.52e-27	5.33e-24	TOP2A
ENSG00000187837	488.555	2.0702	0.199469	10.3785	3.1e-25	5.84e-22	H1-2
ENSG00000124731	3607.63	1.01633	0.0982075	10.3488	4.24e-25	7.17e-22	TREM1
ENSG00000115594	1576.85	1.31091	0.134558	9.74233	1.99e-22	3.06e-19	IL1R1
ENSG00000143333	2749.12	1.23805	0.127799	9.68748	3.41e-22	4.81e-19	RGS16
ENSG00000113070	3586.25	1.08888	0.112669	9.66448	4.27e-22	5.16e-19	HBEGF
ENSG00000115009	3002.8	1.52986	0.158272	9.66605	4.2e-22	5.16e-19	CCL20
ENSG00000066279	287.023	-2.41648	0.256052	-9.43748	3.82e-21	4.31e-18	ASPM
ENSG00000198848	896.691	1.57294	0.166827	9.42862	4.16e-21	4.4e-18	CES1
ENSG00000072571	416.29	-2.09898	0.22327	-9.40105	5.4e-21	5.38e-18	HMMR
ENSG00000137812	743.857	-1.52304	0.167637	-9.08536	1.03e-19	9.72e-17	KNL1
ENSG00000137804	842.601	-1.97921	0.224443	-8.81831	1.16e-18	1.04e-15	NUSAP1
ENSG00000007237	9177.57	-0.754792	0.0863593	-8.74013	2.33e-18	1.97e-15	GAS7
ENSG00000241553	13805	-0.863928	0.0997929	-8.65721	4.83e-18	3.9e-15	ARPC4
ENSG00000185909	2134.63	-0.951937	0.110357	-8.626	6.35e-18	4.89e-15	KLHDC8B
ENSG00000134061	9057.09	-0.930721	0.109051	-8.53471	1.41e-17	1.03e-14	CD180
ENSG00000108960	12498	-0.710866	0.0837753	-8.48539	2.15e-17	1.52e-14	MMD
ENSG00000122966	669.652	-1.59487	0.18816	-8.47613	2.33e-17	1.58e-14	CIT
ENSG00000173391	65327.7	0.739666	0.0874768	8.45556	2.78e-17	1.81e-14	OLR1
ENSG00000123080	534.153	-1.85772	0.220342	-8.43108	3.42e-17	2.15e-14	CDKN2C
ENSG00000275882	565.665	12.2916	1.46085	8.41402	3.96e-17	2.39e-14	IKBKGP1
ENSG00000169679	629.889	-1.48789	0.178572	-8.33215	7.94e-17	4.63e-14	BUB1
ENSG00000117632	2125.27	-1.55215	0.187528	-8.27688	1.26e-16	7.13e-14	STMN1
ENSG00000176890	1243.14	-1.87526	0.227387	-8.24699	1.62e-16	8.87e-14	TYMS
ENSG00000117724	1059.05	-2.0307	0.250652	-8.10167	5.42e-16	2.87e-13	CENPF
ENSG00000110876	7027.58	-0.804632	0.0997686	-8.06499	7.32e-16	3.76e-13	SELPLG
ENSG00000087074	10223.6	0.720391	0.0894427	8.05422	8e-16	3.98e-13	PPP1R15A
ENSG00000076003	3461.97	-0.838082	0.105218	-7.96516	1.65e-15	7.98e-13	MCM6
ENSG00000051341	386.794	-1.56403	0.197019	-7.9385	2.05e-15	9.62e-13	POLQ
ENSG00000258227	10185.4	0.97456	0.122998	7.92337	2.31e-15	1.06e-12	CLEC5A
ENSG00000143476	472.115	-1.88807	0.240657	-7.84546	4.31e-15	1.92e-12	DTL
ENSG00000285725	200.831	-2.11354	0.269808	-7.83347	4.75e-15	2.06e-12	AC004967
ENSG00000171320	324.764	-1.84952	0.237696	-7.781	7.2e-15	3.04e-12	ESCO2
ENSG00000186417	12665.1	0.982133	0.126441	7.76754	8e-15	3.3e-12	GLDN
ENSG00000010292	2163.14	-0.779354	0.101759	-7.65879	1.88e-14	7.56e-12	NCAPD2
ENSG00000237649	783.547	-1.45459	0.190634	-7.63027	2.34e-14	9.22e-12	KIFC1
ENSG00000138160	768.882	-1.76706	0.234886	-7.52303	5.35e-14	2.06e-11	KIF11
ENSG00000101412	889.618	-1.26415	0.168107	-7.51992	5.48e-14	2.06e-11	E2F1
ENSG00000136250	1533.66	-1.28551	0.171421	-7.49912	6.42e-14	2.36e-11	AOAH
ENSG00000166949	2978.11	-0.831837	0.111295	-7.47419	7.77e-14	2.8e-11	SMAD3
ENSG00000167513	360.895	-1.76828	0.238847	-7.40342	1.33e-13	4.68e-11	CDT1
ENSG00000090889	306.668	-2.09846	0.284163	-7.3847	1.53e-13	5.28e-11	KIF4A
ENSG00000130635	842.133	-1.11674	0.152072	-7.3435	2.08e-13	7.03e-11	COL5A1
ENSG00000176845	7753.88	0.688197	0.0937454	7.34113	2.12e-13	7.03e-11	METRNL
ENSG00000153823	1583.06	1.09229	0.148891	7.33615	2.2e-13	7.15e-11	PID1
ENSG00000259207	6458.33	0.860437	0.118059	7.28822	3.14e-13	1e-10	ITGB3
ENSG00000169508	14820.2	0.783958	0.107738	7.27655	3.42e-13	1.07e-10	GPR183
ENSG00000066697	1079.36	1.43832	0.199733	7.20123	5.97e-13	1.84e-10	MSANTD3
ENSG00000178726	7055.66	1.0938	0.151975	7.19725	6.14e-13	1.86e-10	THBD
ENSG00000174371	270.537	-1.92069	0.267836	-7.17114	7.44e-13	2.21e-10	EXO1
ENSG00000283765	35.5052	-9.1321	1.28083	-7.12983	1e-12	2.93e-10	AC131160
ENSG00000111206	599.331	-1.88549	0.265053	-7.11365	1.13e-12	3.24e-10	FOXM1
ENSG00000112149	22266	0.728236	0.102451	7.10811	1.18e-12	3.32e-10	CD83
ENSG00000175305	516.167	-1.85225	0.262305	-7.06144	1.65e-12	4.57e-10	CCNE2
ENSG00000119508	2086.25	1.07569	0.15265	7.04676	1.83e-12	5e-10	NR4A3
ENSG00000156970	527.207	-1.56797	0.222987	-7.03167	2.04e-12	5.48e-10	BUB1B
ENSG00000011422	22469.2	0.721651	0.102791	7.02057	2.21e-12	5.84e-10	PLAUR
ENSG00000204472	13371.3	-0.743223	0.107442	-6.91747	4.6e-12	1.2e-09	AIF1
ENSG00000166508	2565.24	-1.10782	0.160809	-6.889	5.62e-12	1.44e-09	MCM7
ENSG00000120875	1448.18	0.860981	0.125222	6.87563	6.17e-12	1.56e-09	DUSP4
ENSG00000013810	1634.13	-1.00754	0.14688	-6.85962	6.9e-12	1.72e-09	TACC3
ENSG00000145386	644.693	-1.82649	0.266339	-6.85776	6.99e-12	1.72e-09	CCNA2
ENSG00000183444	392.062	2.09626	0.306516	6.83899	7.98e-12	1.93e-09	OR7E38P
ENSG00000144554	982.451	-0.943311	0.138044	-6.83338	8.29e-12	1.98e-09	FANCD2
ENSG00000255833	2190.26	-1.12044	0.164027	-6.83083	8.44e-12	1.98e-09	TIFAB
ENSG00000104738	2980.69	-0.994601	0.145803	-6.82154	9.01e-12	2.09e-09	MCM4
ENSG00000162723	217.643	1.81555	0.266733	6.80662	9.99e-12	2.29e-09	SLAMF9
ENSG00000123358	399.005	1.46747	0.216077	6.79142	1.11e-11	2.46e-09	NR4A1
ENSG00000177606	11492	0.701338	0.103256	6.79224	1.1e-11	2.46e-09	JUN
ENSG00000196878	1819.06	0.73039	0.107561	6.79046	1.12e-11	2.46e-09	LAMB3
ENSG00000073111	2244.78	-0.78415	0.115898	-6.76588	1.33e-11	2.85e-09	MCM2
ENSG00000110330	2249.04	1.00105	0.14797	6.76524	1.33e-11	2.85e-09	BIRC2
ENSG00000197405	45952	0.552925	0.0819613	6.74616	1.52e-11	3.21e-09	C5AR1
ENSG00000178789	1193.25	1.48814	0.222218	6.69677	2.13e-11	4.45e-09	CD300LB
ENSG00000113810	1382.8	-0.814033	0.121734	-6.68696	2.28e-11	4.65e-09	SMC4
ENSG00000197872	3759.32	0.831385	0.124298	6.68864	2.25e-11	4.65e-09	CYRIA
ENSG00000151725	589.884	-1.18815	0.177956	-6.67663	2.44e-11	4.93e-09	CENPU
ENSG00000107104	2370.5	0.970154	0.145362	6.67408	2.49e-11	4.95e-09	KANK1
ENSG00000215472	639.915	-27.2119	4.08052	-6.66873	2.58e-11	5.08e-09	RPL17-C18orf32
ENSG00000125538	80329.5	0.986775	0.148471	6.64626	3.01e-11	5.74e-09	IL1B
ENSG00000166912	3714.59	-0.642631	0.0967002	-6.6456	3.02e-11	5.74e-09	MTMR10
ENSG00000168078	139.828	-2.09566	0.315338	-6.64576	3.02e-11	5.74e-09	PBK
ENSG00000117399	468.71	-1.53407	0.230931	-6.64297	3.07e-11	5.78e-09	CDC20
ENSG00000088325	1096.27	-1.7168	0.258665	-6.63714	3.2e-11	5.88e-09	TPX2
ENSG00000105697	507.707	-1.51366	0.228027	-6.63806	3.18e-11	5.88e-09	HAMP
ENSG00000165304	601.984	-1.31383	0.198116	-6.63164	3.32e-11	6.04e-09	MELK
ENSG00000135476	518.978	-1.55386	0.234407	-6.62891	3.38e-11	6.09e-09	ESPL1
ENSG00000198959	2614.88	1.25619	0.189865	6.61621	3.69e-11	6.57e-09	TGM2
ENSG00000254692	436.341	-26.9635	4.08055	-6.60782	3.9e-11	6.88e-09	AL136295
ENSG00000197183	1634.41	-0.877499	0.133242	-6.58575	4.53e-11	7.9e-09	NOL4L
ENSG00000123870	83.7642	3.09125	0.47041	6.57141	4.98e-11	8.61e-09	ZNF137P
ENSG00000154760	687.97	-1.31824	0.200708	-6.56793	5.1e-11	8.72e-09	SLFN13
ENSG00000277632	22884.9	0.777901	0.118659	6.55576	5.54e-11	9.37e-09	CCL3
ENSG00000257093	5599.88	-0.63865	0.0979183	-6.52228	6.92e-11	1.16e-08	DENND11
ENSG00000176225	1923.48	-0.942674	0.144879	-6.50663	7.69e-11	1.28e-08	RTTN
ENSG00000153162	524.033	1.05953	0.163056	6.49794	8.14e-11	1.34e-08	BMP6
ENSG00000171848	1262.4	-1.08351	0.167265	-6.47778	9.31e-11	1.51e-08	RRM2
ENSG00000138678	2230.36	1.03521	0.160417	6.45324	1.09e-10	1.76e-08	GPAT3
ENSG00000109805	614.331	-1.65507	0.257219	-6.43448	1.24e-10	1.98e-08	NCAPG
ENSG00000011426	971.731	-1.84027	0.286791	-6.41675	1.39e-10	2.2e-08	ANLN
ENSG00000026751	4528.74	-1.02425	0.159724	-6.41262	1.43e-10	2.24e-08	SLAMF7
ENSG00000105011	787.005	-1.43406	0.225381	-6.36283	1.98e-10	3.08e-08	ASF1B
ENSG00000167378	3065	0.703272	0.110813	6.34649	2.2e-10	3.39e-08	IRGQ
ENSG00000141753	450.602	-1.38789	0.219	-6.33741	2.34e-10	3.51e-08	IGFBP4
ENSG00000168496	1493.23	-0.819682	0.129306	-6.33911	2.31e-10	3.51e-08	FEN1
ENSG00000189057	689.005	-1.75337	0.276691	-6.33692	2.34e-10	3.51e-08	FAM111B
ENSG00000169607	365.556	-1.60414	0.25378	-6.32099	2.6e-10	3.86e-08	CKAP2L
ENSG00000142192	12236.1	0.666686	0.105522	6.31797	2.65e-10	3.9e-08	APP
ENSG00000165312	4542.17	0.801952	0.127164	6.30642	2.86e-10	4.17e-08	OTUD1
ENSG00000179750	217.044	-2.53038	0.401992	-6.2946	3.08e-10	4.46e-08	APOBEC3B
ENSG00000156535	1435.97	0.746988	0.118997	6.27737	3.44e-10	4.94e-08	CD109
ENSG00000075218	393.69	-1.82221	0.293701	-6.20431	5.49e-10	7.81e-08	GTSE1
ENSG00000080986	238.454	-1.86509	0.30094	-6.19754	5.74e-10	8.09e-08	NDC80
ENSG00000210049	403.423	-1.36208	0.22003	-6.19043	6e-10	8.39e-08	MT-TF
ENSG00000170312	502.079	-1.75499	0.283725	-6.18552	6.19e-10	8.59e-08	CDK1
ENSG00000198785	341.108	-1.17844	0.191032	-6.16882	6.88e-10	9.47e-08	GRIN3A
ENSG00000184060	17190.7	-0.568009	0.0923906	-6.1479	7.85e-10	1.07e-07	ADAP2
ENSG00000271605	2924.25	-0.580813	0.0947846	-6.12772	8.91e-10	1.21e-07	MILR1
ENSG00000186185	294.379	-1.86646	0.304947	-6.12062	9.32e-10	1.25e-07	KIF18B
ENSG00000095794	1112.91	0.84036	0.137411	6.11568	9.61e-10	1.27e-07	CREM
ENSG00000169403	10825.6	-0.546065	0.0892909	-6.11557	9.62e-10	1.27e-07	PTAFR
ENSG00000126787	213.069	-1.94462	0.319145	-6.09321	1.11e-09	1.45e-07	DLGAP5
ENSG00000146670	673.496	-1.57712	0.258966	-6.09007	1.13e-09	1.47e-07	CDCA5
ENSG00000196352	2534.85	0.644897	0.106023	6.08263	1.18e-09	1.53e-07	CD55
ENSG00000136492	264.628	-1.66405	0.273838	-6.07677	1.23e-09	1.57e-07	BRIP1
ENSG00000136630	2023.92	0.642779	0.105817	6.07446	1.24e-09	1.58e-07	HLX
ENSG00000198805	8226.36	0.630189	0.104745	6.01639	1.78e-09	2.25e-07	PNP
ENSG00000139618	660.483	-0.967814	0.160918	-6.01433	1.81e-09	2.26e-07	BRCA2
ENSG00000171241	928.25	-1.10528	0.184258	-5.99852	1.99e-09	2.48e-07	SHCBP1
ENSG00000101057	809.677	-1.6425	0.273999	-5.99456	2.04e-09	2.52e-07	MYBL2
ENSG00000163808	242.211	-2.00895	0.335263	-5.99217	2.07e-09	2.54e-07	KIF15
ENSG00000109685	2673.58	-0.844496	0.14099	-5.98976	2.1e-09	2.56e-07	NSD2
ENSG00000007968	341.908	-1.7753	0.296664	-5.98422	2.17e-09	2.63e-07	E2F2
ENSG00000134690	503.566	-1.35255	0.226654	-5.96744	2.41e-09	2.89e-07	CDCA8
ENSG00000109861	14462.6	-0.573323	0.0963707	-5.94914	2.7e-09	3.21e-07	CTSC
ENSG00000173198	146.394	-1.81452	0.305569	-5.93817	2.88e-09	3.41e-07	CYSLTR1
ENSG00000197629	7437.59	-0.853616	0.144322	-5.91466	3.33e-09	3.91e-07	MPEG1
ENSG00000165244	629.998	-1.33727	0.226379	-5.90721	3.48e-09	4.06e-07	ZNF367
ENSG00000123219	207.783	-1.47382	0.250461	-5.88441	3.99e-09	4.63e-07	CENPK
ENSG00000134668	875.559	1.32397	0.22593	5.8601	4.63e-09	5.33e-07	SPOCD1
ENSG00000105366	3970.15	-1.15115	0.19657	-5.85616	4.74e-09	5.42e-07	SIGLEC8
ENSG00000072864	1062.38	-0.751259	0.12833	-5.85414	4.79e-09	5.45e-07	NDE1
ENSG00000138182	725.844	-0.892425	0.152661	-5.84578	5.04e-09	5.69e-07	KIF20B
ENSG00000035499	124.381	-1.91817	0.328309	-5.84258	5.14e-09	5.76e-07	DEPDC1B
ENSG00000105486	1573.07	-0.773154	0.132372	-5.84078	5.2e-09	5.79e-07	LIG1
ENSG00000163814	6393.39	0.72663	0.124474	5.83762	5.3e-09	5.86e-07	CDCP1
ENSG00000257335	302.201	1.59286	0.272973	5.83523	5.37e-09	5.9e-07	MGAM
ENSG00000156802	1669.02	-1.01884	0.174991	-5.82224	5.81e-09	6.34e-07	ATAD2
ENSG00000248187	1215.52	0.88267	0.151784	5.81532	6.05e-09	6.57e-07	AC078850
ENSG00000081189	5525.34	-0.68553	0.11791	-5.81401	6.1e-09	6.57e-07	MEF2C
ENSG00000112799	4283.66	-0.620807	0.10704	-5.79975	6.64e-09	7.11e-07	LY86
ENSG00000137807	411.276	-1.64704	0.285043	-5.77822	7.55e-09	8.04e-07	KIF23
ENSG00000186642	158.968	1.7881	0.30956	5.77627	7.64e-09	8.08e-07	PDE2A
ENSG00000120738	2659.73	1.31791	0.228927	5.75691	8.57e-09	9e-07	EGR1
ENSG00000196843	968.093	0.813226	0.141431	5.75	8.92e-09	9.32e-07	ARID5A
ENSG00000142396	1410.26	0.87146	0.151812	5.74038	9.45e-09	9.81e-07	ERVK3-1
ENSG00000092964	6834.92	-0.936136	0.163307	-5.73237	9.9e-09	1.02e-06	DPYSL2
ENSG00000101003	572.457	-1.13409	0.198015	-5.72726	1.02e-08	1.05e-06	GINS1
ENSG00000093072	40553.7	-0.859205	0.150573	-5.70625	1.15e-08	1.18e-06	ADA2
ENSG00000103569	10575	0.669471	0.117419	5.70155	1.19e-08	1.2e-06	AQP9
ENSG00000167600	3553.02	1.11844	0.196171	5.70132	1.19e-08	1.2e-06	CYP2S1
ENSG00000164935	350.133	1.47388	0.259053	5.68949	1.27e-08	1.28e-06	DCSTAMP
ENSG00000132646	3453.5	-0.837444	0.147294	-5.68554	1.3e-08	1.3e-06	PCNA
ENSG00000182487	1980.63	-0.911561	0.160921	-5.66465	1.47e-08	1.45e-06	NCF1B
ENSG00000197256	885.025	-1.03312	0.182977	-5.64618	1.64e-08	1.6e-06	KANK2
ENSG00000214447	55.2861	8.93832	1.5845	5.64111	1.69e-08	1.64e-06	FAM187A
ENSG00000160691	4490.65	0.529877	0.0939944	5.63732	1.73e-08	1.67e-06	SHC1
ENSG00000143786	406.23	0.966467	0.171739	5.62752	1.83e-08	1.76e-06	CNIH3
ENSG00000002933	3128.01	-0.698121	0.124823	-5.5929	2.23e-08	2.11e-06	TMEM176A
ENSG00000169439	11592.8	0.803202	0.143852	5.58354	2.36e-08	2.22e-06	SDC2
ENSG00000018280	31970.2	0.605964	0.108675	5.57595	2.46e-08	2.3e-06	SLC11A1
ENSG00000151790	78.218	3.00062	0.53894	5.56763	2.58e-08	2.4e-06	TDO2
ENSG00000129173	178.164	-1.87968	0.33781	-5.56431	2.63e-08	2.43e-06	E2F8
ENSG00000121152	582.407	-1.36776	0.246081	-5.55815	2.73e-08	2.5e-06	NCAPH
ENSG00000142731	468.996	-0.94199	0.169485	-5.55794	2.73e-08	2.5e-06	PLK4
ENSG00000167325	3097.4	-0.660007	0.119298	-5.53241	3.16e-08	2.87e-06	RRM1
ENSG00000118193	188.001	-1.84523	0.334096	-5.52306	3.33e-08	3.02e-06	KIF14
ENSG00000112137	220.421	-1.44345	0.262079	-5.50769	3.64e-08	3.27e-06	PHACTR1
ENSG00000142945	432.1	-1.79266	0.325582	-5.50602	3.67e-08	3.29e-06	KIF2C
ENSG00000138180	702.574	-1.43226	0.260744	-5.49298	3.95e-08	3.52e-06	CEP55
ENSG00000100292	20761.7	-0.641745	0.117078	-5.48136	4.22e-08	3.74e-06	HMOX1
ENSG00000198056	443.725	-0.902056	0.164669	-5.47799	4.3e-08	3.79e-06	PRIM1
ENSG00000157557	13693.3	0.535799	0.0979568	5.46975	4.51e-08	3.94e-06	ETS2
ENSG00000228474	5808.48	0.573414	0.104842	5.4693	4.52e-08	3.94e-06	OST4
ENSG00000076382	810.93	-1.12002	0.204897	-5.46627	4.6e-08	3.99e-06	SPAG5
ENSG00000183688	1471.13	1.02271	0.187462	5.45557	4.88e-08	4.22e-06	RFLNB
ENSG00000175063	373.169	-2.03256	0.37316	-5.44688	5.13e-08	4.4e-06	UBE2C
ENSG00000173207	743.243	-0.818712	0.150761	-5.43052	5.62e-08	4.8e-06	CKS1B
ENSG00000111247	523.676	-1.18447	0.21822	-5.42787	5.7e-08	4.85e-06	RAD51AP1
ENSG00000112319	155.728	1.95773	0.360937	5.42403	5.83e-08	4.93e-06	EYA4
ENSG00000174469	755.388	-1.20324	0.221926	-5.42182	5.9e-08	4.97e-06	CNTNAP2
ENSG00000167220	1366.61	0.651536	0.120817	5.39274	6.94e-08	5.81e-06	HDHD2
ENSG00000166851	379.703	-1.46606	0.271931	-5.39129	7e-08	5.83e-06	PLK1
ENSG00000082074	4627.22	-0.698624	0.129717	-5.38575	7.21e-08	5.99e-06	FYB1
ENSG00000167900	1167.35	-1.20255	0.223388	-5.38324	7.32e-08	6.04e-06	TK1
ENSG00000011201	3738.2	-0.647841	0.120447	-5.37862	7.51e-08	6.17e-06	ANOS1
ENSG00000127564	364.751	-1.40417	0.261248	-5.37485	7.66e-08	6.27e-06	PKMYT1
ENSG00000092853	1055.51	-1.25304	0.233694	-5.3619	8.24e-08	6.67e-06	CLSPN
ENSG00000177602	255.492	-1.10762	0.207084	-5.34865	8.86e-08	7.14e-06	HASPIN
ENSG00000164109	361.914	-1.37214	0.256858	-5.34202	9.19e-08	7.37e-06	MAD2L1
ENSG00000206337	1065.91	-0.868309	0.162654	-5.33837	9.38e-08	7.49e-06	HCP5
ENSG00000178999	338.63	-1.7165	0.322289	-5.32596	1e-07	7.98e-06	AURKB
ENSG00000108679	6844.74	-0.932222	0.17581	-5.30245	1.14e-07	9.04e-06	LGALS3BP
ENSG00000143344	8975.54	-0.96679	0.182419	-5.29983	1.16e-07	9.12e-06	RGL1
ENSG00000153898	489.785	-1.19339	0.225423	-5.29401	1.2e-07	9.38e-06	MCOLN2
ENSG00000100162	213.12	-1.64829	0.311781	-5.28668	1.25e-07	9.71e-06	CENPM
ENSG00000128050	3989.72	-0.508137	0.0961696	-5.28377	1.27e-07	9.82e-06	PAICS
ENSG00000186074	345.775	-1.04205	0.197414	-5.27849	1.3e-07	1.01e-05	CD300LF
ENSG00000130725	2489.43	0.69753	0.132481	5.26513	1.4e-07	1.08e-05	UBE2M
ENSG00000164045	309.714	-1.2718	0.242929	-5.23526	1.65e-07	1.26e-05	CDC25A
ENSG00000181804	5135.27	-0.638071	0.121866	-5.23586	1.64e-07	1.26e-05	SLC9A9
ENSG00000075426	7662.9	0.634177	0.12118	5.23335	1.66e-07	1.26e-05	FOSL2
ENSG00000155380	3060.15	-0.530635	0.101648	-5.22033	1.79e-07	1.35e-05	SLC16A1
ENSG00000165178	2639.11	-0.867813	0.166324	-5.2176	1.81e-07	1.36e-05	NCF1C
ENSG00000163563	2257.42	-0.907599	0.174241	-5.20888	1.9e-07	1.42e-05	MNDA
ENSG00000152253	143.905	-1.49093	0.286595	-5.20224	1.97e-07	1.47e-05	SPC25
ENSG00000125810	2363.33	1.02395	0.197203	5.19234	2.08e-07	1.54e-05	CD93
ENSG00000088826	1882.47	0.588523	0.113419	5.18892	2.12e-07	1.56e-05	SMOX
ENSG00000100122	1239.02	-0.805754	0.155365	-5.1862	2.15e-07	1.57e-05	CRYBB1
ENSG00000169684	13.5899	-7.74561	1.4935	-5.18622	2.15e-07	1.57e-05	CHRNA5
ENSG00000183549	883.99	-0.852193	0.16432	-5.18618	2.15e-07	1.57e-05	ACSM5
ENSG00000149554	401.925	-1.10593	0.213992	-5.16809	2.37e-07	1.71e-05	CHEK1
ENSG00000100311	4613.92	0.558326	0.108099	5.16496	2.4e-07	1.73e-05	PDGFB
ENSG00000103485	1397.04	-0.857982	0.166252	-5.16074	2.46e-07	1.76e-05	QPRT
ENSG00000112742	319.79	-1.29873	0.251934	-5.15506	2.54e-07	1.81e-05	TTK
ENSG00000213015	886.808	0.68267	0.132567	5.14962	2.61e-07	1.86e-05	ZNF580
ENSG00000140534	131.625	-1.79428	0.348488	-5.14876	2.62e-07	1.86e-05	TICRR
ENSG00000161888	109.597	-2.50277	0.486501	-5.14444	2.68e-07	1.89e-05	SPC24
ENSG00000074696	4195.31	-0.568528	0.110665	-5.13739	2.79e-07	1.92e-05	HACD3
ENSG00000080839	1345.04	-0.595827	0.115954	-5.13849	2.77e-07	1.92e-05	RBL1
ENSG00000145358	1975.16	0.932017	0.181341	5.13957	2.75e-07	1.92e-05	DDIT4L
ENSG00000179094	1688.88	0.665681	0.129571	5.13758	2.78e-07	1.92e-05	PER1
ENSG00000234964	3558.05	0.523579	0.101905	5.1379	2.78e-07	1.92e-05	FABP5P7
ENSG00000102359	269.767	1.09886	0.2141	5.13246	2.86e-07	1.97e-05	SRPX2
ENSG00000214063	1860.34	-0.79482	0.154894	-5.13137	2.88e-07	1.97e-05	TSPAN4
ENSG00000186188	192.017	-1.16314	0.226808	-5.12832	2.92e-07	1.99e-05	FFAR4
ENSG00000164032	4334.5	-0.646975	0.126319	-5.12174	3.03e-07	2.06e-05	H2AZ1
ENSG00000152217	392.288	-1.19022	0.232568	-5.11771	3.09e-07	2.09e-05	SETBP1
ENSG00000140525	1296.13	-1.07258	0.209633	-5.11648	3.11e-07	2.1e-05	FANCI
ENSG00000136824	1933.18	-0.664956	0.130133	-5.10981	3.22e-07	2.17e-05	SMC2
ENSG00000054219	10987.6	-0.725695	0.142973	-5.07575	3.86e-07	2.57e-05	LY75
ENSG00000204482	3986.39	-0.668066	0.131682	-5.07333	3.91e-07	2.59e-05	LST1
ENSG00000071539	457.088	-1.12405	0.221932	-5.06482	4.09e-07	2.7e-05	TRIP13
ENSG00000235272	78.7319	3.13947	0.619953	5.06405	4.1e-07	2.7e-05	RAMACL
ENSG00000103522	1411.67	-0.846938	0.167288	-5.06275	4.13e-07	2.71e-05	IL21R
ENSG00000183578	17660.2	0.598687	0.118314	5.06017	4.19e-07	2.74e-05	TNFAIP8L3
ENSG00000160791	6669.99	-0.654863	0.129622	-5.0521	4.37e-07	2.83e-05	CCR5
ENSG00000151503	2200.24	-0.501884	0.0996169	-5.03814	4.7e-07	3.04e-05	NCAPD3
ENSG00000132182	3379.65	-0.600161	0.119202	-5.03483	4.78e-07	3.08e-05	NUP210
ENSG00000223953	18.3554	-8.18072	1.62535	-5.03319	4.82e-07	3.09e-05	C1QTNF5
ENSG00000075702	448.275	-1.00816	0.200775	-5.02134	5.13e-07	3.28e-05	WDR62
ENSG00000143416	1395.89	-1.01283	0.202753	-4.99539	5.87e-07	3.74e-05	SELENBP1
ENSG00000168918	10344.9	-0.628052	0.125769	-4.9937	5.92e-07	3.75e-05	INPP5D
ENSG00000134057	522.2	-1.08579	0.217603	-4.98979	6.04e-07	3.82e-05	CCNB1
ENSG00000127951	4211.76	-0.787478	0.158032	-4.98302	6.26e-07	3.94e-05	FGL2
ENSG00000107731	3431.46	-0.533064	0.107034	-4.98031	6.35e-07	3.98e-05	UNC5B
ENSG00000142875	1418.37	-0.707576	0.142286	-4.97291	6.6e-07	4.12e-05	PRKACB
ENSG00000180155	2653.06	-0.616101	0.123935	-4.97118	6.65e-07	4.14e-05	LYNX1
ENSG00000013619	906.555	0.851984	0.17152	4.96726	6.79e-07	4.21e-05	MAMLD1
ENSG00000146918	1604.01	-0.713948	0.144372	-4.94518	7.61e-07	4.68e-05	NCAPG2
ENSG00000150347	7545.42	0.610547	0.123496	4.94387	7.66e-07	4.7e-05	ARID5B
ENSG00000184661	164.706	-2.10794	0.42746	-4.93131	8.17e-07	4.99e-05	CDCA2
ENSG00000092470	746.33	-0.993373	0.201661	-4.92596	8.39e-07	5.11e-05	WDR76
ENSG00000184371	4283.32	1.06521	0.216336	4.92385	8.49e-07	5.15e-05	CSF1
ENSG00000151490	4422.46	-0.561994	0.114198	-4.92123	8.6e-07	5.2e-05	PTPRO
ENSG00000175643	159.747	-1.59627	0.324819	-4.91433	8.91e-07	5.37e-05	RMI2
ENSG00000143878	8110.96	0.64653	0.132108	4.89394	9.88e-07	5.89e-05	RHOB
ENSG00000130821	1543.45	-0.667337	0.136812	-4.87778	1.07e-06	6.37e-05	SLC6A8
ENSG00000103540	734.762	-0.864183	0.177781	-4.86093	1.17e-06	6.91e-05	CCP110
ENSG00000164309	340.044	1.07334	0.220973	4.85733	1.19e-06	7.02e-05	CMYA5
ENSG00000172059	2147.3	-0.502112	0.103427	-4.85476	1.21e-06	7.08e-05	KLF11
ENSG00000105855	1477.36	1.33484	0.275701	4.84163	1.29e-06	7.54e-05	ITGB8
ENSG00000123485	328.049	-1.72385	0.356239	-4.83901	1.3e-06	7.59e-05	HJURP
ENSG00000259953	1009.91	-0.65647	0.135658	-4.83915	1.3e-06	7.59e-05	AL138756
ENSG00000039560	469.67	1.01847	0.210865	4.82998	1.37e-06	7.87e-05	RAI14
ENSG00000188486	1702.25	-0.786137	0.162771	-4.8297	1.37e-06	7.87e-05	H2AX
ENSG00000110077	335.616	-1.1705	0.242512	-4.82655	1.39e-06	7.94e-05	MS4A6A
ENSG00000184916	212.867	-1.12677	0.23344	-4.8268	1.39e-06	7.94e-05	JAG2
ENSG00000197329	1621.86	-0.529904	0.109853	-4.82374	1.41e-06	8e-05	PELI1
ENSG00000051180	386.454	-1.11698	0.231882	-4.81705	1.46e-06	8.23e-05	RAD51
ENSG00000143554	892.561	0.870476	0.180738	4.81625	1.46e-06	8.23e-05	SLC27A3
ENSG00000210077	205.812	-1.03244	0.21437	-4.81616	1.46e-06	8.23e-05	MT-TV
ENSG00000185436	5085.25	0.520948	0.108339	4.80851	1.52e-06	8.52e-05	IFNLR1
ENSG00000112984	227.136	-2.04181	0.424844	-4.80602	1.54e-06	8.6e-05	KIF20A
ENSG00000101040	1546.2	-0.581064	0.121077	-4.79912	1.59e-06	8.87e-05	ZMYND8
ENSG00000271723	220.088	10.93	2.27817	4.79773	1.6e-06	8.9e-05	MROH7-TTC4
ENSG00000136108	1220.49	-0.818871	0.170763	-4.79538	1.62e-06	8.98e-05	CKAP2
ENSG00000068489	938.932	-0.934085	0.194981	-4.79066	1.66e-06	9.13e-05	PRR11
ENSG00000164687	28473.9	0.503002	0.105098	4.78605	1.7e-06	9.32e-05	FABP5
ENSG00000184445	1742.27	-0.592032	0.12401	-4.77407	1.81e-06	9.86e-05	KNTC1
ENSG00000148082	1325.13	0.857011	0.179798	4.76651	1.87e-06	0.000102005	SHC3
ENSG00000165246	722.617	-0.845673	0.177528	-4.76362	1.9e-06	0.000103146	NLGN4Y
ENSG00000235106	522.783	1.01803	0.214469	4.74677	2.07e-06	0.000111758	BRD3OS
ENSG00000284946	662.126	-1.8293	0.385758	-4.74209	2.12e-06	0.000114008	AC068831
ENSG00000070190	1665.75	-0.573543	0.120966	-4.74134	2.12e-06	0.000114066	DAPP1
ENSG00000184545	411.985	0.988101	0.209003	4.72768	2.27e-06	0.000121629	DUSP8
ENSG00000166033	41195.4	0.532848	0.112753	4.72579	2.29e-06	0.000122375	HTRA1
ENSG00000152642	1056.74	-1.72887	0.366573	-4.7163	2.4e-06	0.000127444	GPD1L
ENSG00000164611	371.929	-0.986217	0.209138	-4.71562	2.41e-06	0.000127444	PTTG1
ENSG00000165714	535.01	1.17866	0.249937	4.71585	2.41e-06	0.000127444	BORCS5
ENSG00000112118	3687.7	-0.612842	0.130413	-4.69923	2.61e-06	0.00013768	MCM3
ENSG00000126709	14455.5	-1.10372	0.235276	-4.69116	2.72e-06	0.000142783	IFI6
ENSG00000090104	11847.6	0.820934	0.175504	4.67758	2.9e-06	0.000152099	RGS1
ENSG00000131153	403.435	-1.09003	0.233218	-4.67386	2.96e-06	0.000154403	GINS2
ENSG00000135451	174.768	-1.8076	0.388526	-4.65246	3.28e-06	0.000170805	TROAP
ENSG00000091651	402.746	-1.02612	0.220707	-4.64923	3.33e-06	0.000172544	ORC6
ENSG00000185697	149.425	-1.56139	0.335886	-4.64857	3.34e-06	0.000172544	MYBL1
ENSG00000012061	4847.09	0.523555	0.112812	4.64095	3.47e-06	0.000177859	ERCC1
ENSG00000112029	298.322	-1.05785	0.228558	-4.62837	3.69e-06	0.000187871	FBXO5
ENSG00000198176	3219.48	-0.558222	0.120598	-4.62876	3.68e-06	0.000187871	TFDP1
ENSG00000167604	1217.88	0.6802	0.147099	4.62408	3.76e-06	0.000191229	NFKBID
ENSG00000024526	92.3387	-2.10704	0.455772	-4.623	3.78e-06	0.000191651	DEPDC1
ENSG00000160957	579.673	-1.00273	0.217143	-4.61782	3.88e-06	0.000195324	RECQL4
ENSG00000173083	1630.82	-0.752332	0.163162	-4.61096	4.01e-06	0.000201288	HPSE
ENSG00000180921	780.594	1.29994	0.282272	4.60528	4.12e-06	0.000206244	FAM83H
ENSG00000051108	7119.63	0.506594	0.110189	4.59752	4.28e-06	0.000213447	HERPUD1
ENSG00000100350	603.696	-0.842664	0.183542	-4.59112	4.41e-06	0.000219449	FOXRED2
ENSG00000101670	882.654	-1.21081	0.2641	-4.58465	4.55e-06	0.000225033	LIPG
ENSG00000164674	2273.44	0.646095	0.140924	4.5847	4.55e-06	0.000225033	SYTL3
ENSG00000179388	173.076	1.94318	0.424184	4.58099	4.63e-06	0.000228344	EGR3
ENSG00000177084	2025.51	-0.703009	0.15352	-4.57926	4.67e-06	0.000229569	POLE
ENSG00000103489	5329.12	0.584988	0.127842	4.57587	4.74e-06	0.000232637	XYLT1
ENSG00000186871	125.731	-1.91721	0.419055	-4.57508	4.76e-06	0.000232841	ERCC6L
ENSG00000221829	636.59	-0.654316	0.143103	-4.57233	4.82e-06	0.000235242	FANCG
ENSG00000106089	466.364	0.744212	0.162923	4.56788	4.93e-06	0.000238912	STX1A
ENSG00000198682	1852.26	0.657706	0.14397	4.56835	4.92e-06	0.000238912	PAPSS2
ENSG00000085999	204.861	-1.47029	0.322471	-4.55944	5.13e-06	0.000248008	RAD54L
ENSG00000143067	1184.31	0.795963	0.174688	4.55648	5.2e-06	0.000250818	ZNF697
ENSG00000152229	2837.54	-0.710702	0.156152	-4.55136	5.33e-06	0.000255715	PSTPIP2
ENSG00000116161	2357.71	-0.595102	0.130948	-4.54459	5.5e-06	0.000263149	CACYBP
ENSG00000255491	266.662	1.13995	0.251014	4.54138	5.59e-06	0.000266426	AC100858
ENSG00000166579	3701.67	0.61498	0.135526	4.53773	5.69e-06	0.000270326	NDEL1
ENSG00000093000	4331.28	-0.503936	0.111111	-4.53541	5.75e-06	0.000271883	NUP50
ENSG00000102384	290.173	-0.993821	0.219128	-4.53533	5.75e-06	0.000271883	CENPI
ENSG00000093009	375.96	-1.33773	0.295002	-4.53465	5.77e-06	0.000272009	CDC45
ENSG00000106462	873.197	-0.732428	0.161861	-4.52505	6.04e-06	0.00028386	EZH2
ENSG00000129195	111.687	-1.94922	0.432425	-4.50765	6.56e-06	0.000307306	PIMREG
ENSG00000101916	3038.23	-1.0719	0.23797	-4.50433	6.66e-06	0.00031128	TLR8
ENSG00000112902	2082.48	0.718561	0.159555	4.50355	6.68e-06	0.000311573	SEMA5A
ENSG00000277443	29679.5	-0.641984	0.143021	-4.48873	7.16e-06	0.000332212	MARCKS
ENSG00000165891	171.003	-1.98623	0.442876	-4.48485	7.3e-06	0.000337397	E2F7
ENSG00000065328	311.061	-1.51877	0.339229	-4.47712	7.57e-06	0.000347942	MCM10
ENSG00000279133	17.4308	7.271	1.62563	4.47273	7.72e-06	0.000354206	AC018628
ENSG00000170345	5897.33	-0.527715	0.118069	-4.46955	7.84e-06	0.000358531	FOS
ENSG00000106565	7540.75	-0.646302	0.144743	-4.46517	8e-06	0.000364962	TMEM176B
ENSG00000135447	566.958	-0.859654	0.192584	-4.46379	8.05e-06	0.000366334	PPP1R1A
ENSG00000166165	404.377	-1.30407	0.292758	-4.45441	8.41e-06	0.000381694	CKB
ENSG00000125885	670.359	-0.724729	0.162989	-4.44649	8.73e-06	0.000394979	MCM8
ENSG00000113368	948.767	-1.2574	0.282838	-4.44567	8.76e-06	0.000395432	LMNB1
ENSG00000196218	2163.99	-0.703706	0.158362	-4.44364	8.84e-06	0.000398114	RYR1
ENSG00000140682	1376.73	0.522644	0.118239	4.42023	9.86e-06	0.000440277	TGFB1I1
ENSG00000197275	161.632	-1.34649	0.304611	-4.42036	9.85e-06	0.000440277	RAD54B
ENSG00000198554	684.879	-0.585441	0.132568	-4.41616	1e-05	0.000445128	WDHD1
ENSG00000166451	448.098	-0.910117	0.206257	-4.41254	1.02e-05	0.000449091	CENPN
ENSG00000224596	217.544	1.24497	0.282099	4.41323	1.02e-05	0.000449091	ZMIZ1-AS1
ENSG00000267519	1426.66	0.666102	0.150943	4.41292	1.02e-05	0.000449091	AC020916
ENSG00000108688	1236.74	1.10147	0.249716	4.41089	1.03e-05	0.000451368	CCL7
ENSG00000054654	112.052	-2.07813	0.471932	-4.40345	1.07e-05	0.000465936	SYNE2
ENSG00000239474	371.535	0.974616	0.221643	4.39724	1.1e-05	0.000477884	KLHL41
ENSG00000108468	2591.97	-0.503025	0.114464	-4.39461	1.11e-05	0.000481562	CBX1
ENSG00000103995	412.493	-0.765539	0.174584	-4.38494	1.16e-05	0.000499617	CEP152
ENSG00000186407	4553.59	0.750676	0.171186	4.38515	1.16e-05	0.000499617	CD300E
ENSG00000143771	2008.6	0.615793	0.140589	4.38008	1.19e-05	0.000508295	CNIH4
ENSG00000163507	546.695	-0.707472	0.161619	-4.37741	1.2e-05	0.000513266	CIP2A
ENSG00000198829	1445.23	-0.747725	0.171127	-4.36942	1.25e-05	0.000531072	SUCNR1
ENSG00000110880	30879.2	0.791032	0.181219	4.36505	1.27e-05	0.000540425	CORO1C
ENSG00000155366	8434.1	0.743768	0.17044	4.3638	1.28e-05	0.000540843	RHOC
ENSG00000174738	806.373	-0.575543	0.131891	-4.36379	1.28e-05	0.000540843	NR1D2
ENSG00000171444	778.981	-0.73834	0.16925	-4.36243	1.29e-05	0.000542849	MCC
ENSG00000173372	25360.1	-0.638552	0.146406	-4.36152	1.29e-05	0.000543772	C1QA
ENSG00000138646	1772.74	-1.21094	0.278282	-4.35149	1.35e-05	0.000566434	HERC5
ENSG00000166803	280.716	-1.54271	0.354733	-4.34892	1.37e-05	0.000570758	PCLAF
ENSG00000058804	1360.56	-0.613929	0.141288	-4.34525	1.39e-05	0.000578492	NDC1
ENSG00000186395	478.365	0.752346	0.173266	4.34214	1.41e-05	0.000585297	KRT10
ENSG00000258301	282.906	1.1413	0.263168	4.33678	1.45e-05	0.000598278	VASH1-AS1
ENSG00000166825	4686.81	0.732009	0.168839	4.33555	1.45e-05	0.000600165	ANPEP
ENSG00000100526	140.362	-1.60595	0.370611	-4.33325	1.47e-05	0.000605006	CDKN3
ENSG00000139734	152.629	-1.63881	0.378339	-4.33158	1.48e-05	0.000608125	DIAPH3
ENSG00000145390	2443.16	0.547424	0.126444	4.32937	1.5e-05	0.000612781	USP53
ENSG00000276231	1545.87	-0.589297	0.136208	-4.32645	1.52e-05	0.000617951	PIK3R6
ENSG00000117650	74.9637	-2.25805	0.522121	-4.32476	1.53e-05	0.000619319	NEK2
ENSG00000118113	14.9696	7.05185	1.63071	4.32441	1.53e-05	0.000619319	MMP8
ENSG00000133302	434.449	-0.779236	0.180239	-4.32334	1.54e-05	0.000619319	SLF1
ENSG00000183696	2668.28	0.726401	0.167999	4.32384	1.53e-05	0.000619319	UPP1
ENSG00000282933	19.5103	7.4323	1.71912	4.32332	1.54e-05	0.000619319	RHOXF1P3
ENSG00000166928	3630.46	0.539613	0.124922	4.3196	1.56e-05	0.00062837	MS4A14
ENSG00000088992	1015.88	-1.03382	0.239434	-4.31779	1.58e-05	0.00063204	TESC
ENSG00000120162	646.778	0.964957	0.223578	4.31598	1.59e-05	0.000635725	MOB3B
ENSG00000181631	291.253	-1.53398	0.355485	-4.31518	1.59e-05	0.000636526	P2RY13
ENSG00000108946	13369.5	0.78721	0.182974	4.3023	1.69e-05	0.000665292	PRKAR1A
ENSG00000249992	117.634	1.68307	0.391168	4.30267	1.69e-05	0.000665292	TMEM158
ENSG00000185924	494.249	-0.801897	0.186755	-4.29383	1.76e-05	0.000689578	RTN4RL1
ENSG00000178685	4626.54	-0.529981	0.123613	-4.28742	1.81e-05	0.000708148	PARP10
ENSG00000012048	839.082	-0.878136	0.204998	-4.28363	1.84e-05	0.000718648	BRCA1
ENSG00000286694	17.8854	7.30686	1.70764	4.27893	1.88e-05	0.000732306	AL161935
ENSG00000160200	102.409	-1.55451	0.364127	-4.26916	1.96e-05	0.000761636	CBS
ENSG00000197299	410.417	-0.981371	0.229955	-4.26766	1.98e-05	0.000763247	BLM
ENSG00000063046	13517.2	0.625241	0.146711	4.26171	2.03e-05	0.000780292	EIF4B
ENSG00000197948	2213.9	0.568124	0.133309	4.26172	2.03e-05	0.000780292	FCHSD1
ENSG00000198894	1376.57	2.39511	0.562089	4.26108	2.03e-05	0.000780726	CIPC
ENSG00000138640	995.707	-0.701798	0.165022	-4.25276	2.11e-05	0.000808484	FAM13A
ENSG00000251867	20.3286	7.49625	1.76715	4.24199	2.22e-05	0.000846361	AC009812
ENSG00000137752	1894.71	-0.704445	0.166212	-4.23822	2.25e-05	0.000858765	CASP1
ENSG00000237181	242.906	0.95616	0.225668	4.23702	2.27e-05	0.000861443	PRKAR1B-AS1
ENSG00000122952	924.114	-0.690975	0.163152	-4.23515	2.28e-05	0.000866689	ZWINT
ENSG00000288634	25.1841	3.71966	0.879253	4.23048	2.33e-05	0.000882913	AC079741
ENSG00000133119	532.429	-0.747965	0.17692	-4.22769	2.36e-05	0.00089054	RFC3
ENSG00000075340	73.0415	-1.7166	0.406273	-4.22524	2.39e-05	0.000897657	ADD2
ENSG00000107562	906.155	-1.39278	0.329821	-4.22285	2.41e-05	0.000905242	CXCL12
ENSG00000020577	2852.31	-0.943942	0.224176	-4.21071	2.55e-05	0.000953166	SAMD4A
ENSG00000183048	400.65	-0.934794	0.222276	-4.20555	2.6e-05	0.000970868	SLC25A10
ENSG00000164877	1084.32	0.587725	0.139792	4.20428	2.62e-05	0.000974213	MICALL2
ENSG00000164684	224.141	-0.99808	0.237731	-4.19836	2.69e-05	0.00099781	ZNF704
ENSG00000187912	241.051	-1.33622	0.319643	-4.18037	2.91e-05	0.00107545	CLEC17A
ENSG00000168306	70.9034	1.86074	0.445206	4.17951	2.92e-05	0.00107717	ACOX2
ENSG00000061676	1013.69	-0.625414	0.149681	-4.17832	2.94e-05	0.00108045	NCKAP1
ENSG00000159871	67.932	-1.52434	0.365373	-4.17201	3.02e-05	0.00110839	LYPD5
ENSG00000225210	169.786	1.23029	0.294976	4.17082	3.04e-05	0.00111179	DUXAP9
ENSG00000157456	411.339	-1.37994	0.331132	-4.16735	3.08e-05	0.00112644	CCNB2
ENSG00000186638	202.581	-1.09847	0.263696	-4.16568	3.1e-05	0.00113227	KIF24
ENSG00000275302	25397.6	0.533206	0.128083	4.16297	3.14e-05	0.00114084	CCL4
ENSG00000152953	166.892	-1.30259	0.313343	-4.15708	3.22e-05	0.00116814	STK32B
ENSG00000138778	568.883	-0.895188	0.215415	-4.15564	3.24e-05	0.00117143	CENPE
ENSG00000166483	297.561	-1.89904	0.458758	-4.13953	3.48e-05	0.00124785	WEE1
ENSG00000180113	1082.06	1.02879	0.248565	4.13891	3.49e-05	0.00124856	TDRD6
ENSG00000129993	125.164	-1.23709	0.299133	-4.13557	3.54e-05	0.00126185	CBFA2T3
ENSG00000155629	35568.5	-0.600564	0.145221	-4.13552	3.54e-05	0.00126185	PIK3AP1
ENSG00000077152	376.387	-0.771162	0.186538	-4.13408	3.56e-05	0.00126708	UBE2T
ENSG00000197471	2868.6	-1.29939	0.314978	-4.12532	3.7e-05	0.00131079	SPN
ENSG00000196387	229.729	1.13645	0.275936	4.11854	3.81e-05	0.00134436	ZNF140
ENSG00000230590	991.356	1.21018	0.294263	4.11259	3.91e-05	0.00137659	FTX
ENSG00000230204	2161.34	0.889333	0.216286	4.11184	3.93e-05	0.00137824	FTH1P5
ENSG00000198901	562.22	-1.59641	0.388834	-4.10564	4.03e-05	0.00140986	PRC1
ENSG00000244165	1321.91	-0.91048	0.221751	-4.10587	4.03e-05	0.00140986	P2RY11
ENSG00000143228	142.232	-1.71823	0.420017	-4.09087	4.3e-05	0.00149962	NUF2
ENSG00000104951	13063.3	-0.586256	0.143497	-4.08549	4.4e-05	0.00153166	IL4I1
ENSG00000264247	296.869	0.985954	0.241393	4.08443	4.42e-05	0.00153352	LINC00909
ENSG00000051825	905.285	-0.622311	0.152773	-4.07345	4.63e-05	0.00159664	MPHOSPH9
ENSG00000105173	353.935	-0.938417	0.23081	-4.06576	4.79e-05	0.00164352	CCNE1
ENSG00000106034	906.074	-0.660486	0.162496	-4.06463	4.81e-05	0.00164816	CPED1
ENSG00000079616	1096.63	-0.629657	0.155059	-4.06076	4.89e-05	0.00166648	KIF22
ENSG00000117091	2272.91	-0.615784	0.151665	-4.06017	4.9e-05	0.00166648	CD48
ENSG00000150637	6316.88	1.12016	0.275884	4.06026	4.9e-05	0.00166648	CD226
ENSG00000007264	5776.74	0.706611	0.174861	4.04099	5.32e-05	0.00180162	MATK
ENSG00000177614	2289.6	-0.574457	0.14227	-4.03778	5.4e-05	0.00182274	PGBD5
ENSG00000157350	2328.96	0.734287	0.182054	4.03334	5.5e-05	0.00185385	ST3GAL2
ENSG00000250151	450.258	0.934261	0.232403	4.02001	5.82e-05	0.00195419	ARPC4-TTLL3
ENSG00000131370	1457.35	0.847442	0.211063	4.01512	5.94e-05	0.00199116	SH3BP5
ENSG00000167664	349.529	-0.911777	0.227152	-4.01395	5.97e-05	0.00199711	TMIGD2
ENSG00000128059	619.191	-0.58205	0.145121	-4.01079	6.05e-05	0.00202008	PPAT
ENSG00000123104	9310	-0.552432	0.137845	-4.00763	6.13e-05	0.0020392	ITPR2
ENSG00000137331	11730.7	0.516467	0.129225	3.99664	6.42e-05	0.00211959	IER3
ENSG00000242732	471.578	-0.73829	0.184712	-3.99697	6.42e-05	0.00211959	RTL5
ENSG00000240963	45.7253	4.81641	1.20583	3.99426	6.49e-05	0.00213677	AL645465
ENSG00000109674	43.9423	-3.0264	0.761514	-3.97419	7.06e-05	0.00230281	NEIL3
ENSG00000205155	1552.58	0.722979	0.182411	3.96347	7.39e-05	0.00238628	PSENEN
ENSG00000286185	181.376	5.84334	1.47425	3.96361	7.38e-05	0.00238628	AC242842
ENSG00000188001	81.9238	1.81382	0.458001	3.9603	7.49e-05	0.00241305	TPRG1
ENSG00000253982	1266.65	0.517721	0.13083	3.95721	7.58e-05	0.00243524	AC100810
ENSG00000138346	268.828	-0.923286	0.233584	-3.95269	7.73e-05	0.00247695	DNA2
ENSG00000120256	451.13	-0.774885	0.196078	-3.95192	7.75e-05	0.00248024	LRP11
ENSG00000141971	1032.88	0.607794	0.153973	3.94741	7.9e-05	0.00252271	MVB12A
ENSG00000111602	3034.38	-0.508857	0.128934	-3.94664	7.93e-05	0.00252608	TIMELESS
ENSG00000132965	14249	0.547998	0.138968	3.94334	8.04e-05	0.00255625	ALOX5AP
ENSG00000173546	824.814	0.683402	0.173387	3.94148	8.1e-05	0.00257039	CSPG4
ENSG00000213658	363.178	0.907231	0.230197	3.94112	8.11e-05	0.00257039	LAT
ENSG00000131080	98.5671	-1.5012	0.381535	-3.93463	8.33e-05	0.00263109	EDA2R
ENSG00000263244	901.009	5.44067	1.38277	3.93462	8.33e-05	0.00263109	AC087190
ENSG00000152760	288.309	0.832263	0.211818	3.92914	8.52e-05	0.00268672	TCTEX1D1
ENSG00000158517	7481.25	-0.548718	0.139725	-3.92714	8.6e-05	0.00270411	NCF1
ENSG00000197646	314.307	-0.805597	0.20516	-3.92667	8.61e-05	0.00270434	PDCD1LG2
ENSG00000136869	8520.89	-0.527512	0.134495	-3.92216	8.78e-05	0.00274917	TLR4
ENSG00000123473	493.11	-0.864869	0.220611	-3.92034	8.84e-05	0.00275602	STIL
ENSG00000128272	2748.26	0.908025	0.231675	3.91939	8.88e-05	0.00276171	ATF4
ENSG00000121764	25.9129	2.71018	0.691565	3.91891	8.9e-05	0.00276224	HCRTR1
ENSG00000188389	69.9369	2.0191	0.515282	3.91843	8.91e-05	0.00276261	PDCD1
ENSG00000120949	502.418	-0.647894	0.165671	-3.91073	9.2e-05	0.00284177	TNFRSF8
ENSG00000232656	35.9449	4.18919	1.07116	3.91089	9.2e-05	0.00284177	IDI2-AS1
ENSG00000116990	247.377	-0.890673	0.228128	-3.90427	9.45e-05	0.00290822	MYCL
ENSG00000100234	171.953	1.17856	0.302218	3.89971	9.63e-05	0.0029581	TIMP3
ENSG00000198743	2601.22	-0.697154	0.178868	-3.89758	9.72e-05	0.0029788	SLC5A3
ENSG00000144827	1142.99	0.63914	0.164077	3.89537	9.8e-05	0.00299523	ABHD10
ENSG00000196979	93.2115	1.52441	0.391312	3.89563	9.79e-05	0.00299523	GPRACR
ENSG00000169413	780.511	-0.843241	0.2167	-3.89129	9.97e-05	0.003031	RNASE6
ENSG00000204044	139.262	1.18344	0.30411	3.89148	9.96e-05	0.003031	SLC12A5-AS1
ENSG00000276043	1550.7	-0.982719	0.25255	-3.89118	9.98e-05	0.003031	UHRF1
ENSG00000232884	365.061	-0.762046	0.196065	-3.8867	0.000101615	0.00307096	AF127936
ENSG00000251442	1439.07	-0.853981	0.219714	-3.88679	0.000101579	0.00307096	LINC01094
ENSG00000288637	24.6637	7.77334	2.00154	3.88368	0.000102887	0.00310386	AC013477
ENSG00000107957	2979.99	0.568945	0.14706	3.86879	0.000109375	0.00328785	SH3PXD2A
ENSG00000104814	651.212	-0.78154	0.202092	-3.86725	0.000110069	0.00330286	MAP4K1
ENSG00000103168	1777.11	0.645085	0.167022	3.86228	0.000112334	0.00335632	TAF1C
ENSG00000142512	6936.65	-0.596894	0.154554	-3.86204	0.000112446	0.00335632	SIGLEC10
ENSG00000205208	397.494	-0.673403	0.17433	-3.8628	0.000112097	0.00335632	C4orf46
ENSG00000148339	2797.6	0.527102	0.13652	3.86099	0.000112929	0.00336481	SLC25A25
ENSG00000116711	1027.75	-0.501082	0.129835	-3.85937	0.00011368	0.00338122	PLA2G4A
ENSG00000183337	2625.05	-0.529813	0.137301	-3.85876	0.000113965	0.00338376	BCOR
ENSG00000256053	652.118	0.670654	0.174008	3.85417	0.000116125	0.00344186	COA8
ENSG00000261371	16338.4	-0.581877	0.151082	-3.85139	0.000117451	0.00346902	PECAM1
ENSG00000166816	1642.13	-0.507678	0.131947	-3.84758	0.000119291	0.003505	LDHD
ENSG00000173281	2040.69	0.567895	0.147933	3.83886	0.000123607	0.00361924	PPP1R3B
ENSG00000162654	293.398	-0.976426	0.254423	-3.8378	0.000124141	0.00362861	GBP4
ENSG00000196369	3278.82	-0.546847	0.142597	-3.83491	0.000125608	0.00366517	SRGAP2B
ENSG00000137563	687.331	-0.684916	0.178636	-3.83415	0.000125999	0.00367024	GGH
ENSG00000131351	819.341	-0.557323	0.145381	-3.83355	0.000126309	0.00367294	HAUS8
ENSG00000227502	375.509	-0.958095	0.249956	-3.83306	0.000126561	0.00367397	MROCKI
ENSG00000214357	59.3555	-3.39938	0.888695	-3.82513	0.000130702	0.0037812	NEURL1B
ENSG00000143376	1584.77	-1.31756	0.344573	-3.82374	0.000131445	0.00379621	SNX27
ENSG00000187741	546.724	-0.77131	0.201986	-3.81863	0.000134194	0.00386189	FANCA
ENSG00000138376	582.985	-0.960172	0.251693	-3.81486	0.000136259	0.00390857	BARD1
ENSG00000157111	29.177	-2.33605	0.612473	-3.81413	0.000136664	0.00391355	TMEM171
ENSG00000174837	1169.18	-1.1676	0.306576	-3.80853	0.000139794	0.0039964	ADGRE1
ENSG00000075223	534.897	0.976909	0.256963	3.80175	0.00014368	0.0040868	SEMA3C
ENSG00000111665	198.66	-1.72925	0.455005	-3.80052	0.000144395	0.00409893	CDCA3
ENSG00000125648	845.916	-0.603791	0.158885	-3.80018	0.000144591	0.00409893	SLC25A23
ENSG00000168329	132.421	-1.47086	0.387478	-3.79599	0.000147054	0.00415482	CX3CR1
ENSG00000159259	291.439	-1.26183	0.332973	-3.78958	0.000150899	0.00425636	CHAF1B
ENSG00000144354	94.2654	-1.56481	0.413581	-3.78356	0.000154602	0.00434632	CDCA7
ENSG00000134830	2644.82	0.525481	0.139079	3.77828	0.000157913	0.00442531	C5AR2
ENSG00000171617	965.609	-0.704287	0.186518	-3.77598	0.000159382	0.00445114	ENC1
ENSG00000210195	274.23	-0.760301	0.201332	-3.77635	0.000159145	0.00445114	MT-TT
ENSG00000166529	332.495	1.04267	0.276266	3.77415	0.000160555	0.00447651	ZSCAN21
ENSG00000106100	859.581	-0.56747	0.150569	-3.76885	0.000164004	0.00455764	NOD1
ENSG00000136286	5937.82	-0.661604	0.175614	-3.76737	0.00016498	0.00457724	MYO1G
ENSG00000127124	1572.4	-0.556403	0.148043	-3.7584	0.000171007	0.00472123	HIVEP3
ENSG00000100427	741.489	-0.753071	0.200526	-3.75548	0.00017301	0.00476876	MLC1
ENSG00000205710	223.24	1.22415	0.326277	3.75185	0.000175531	0.0048304	C17orf107
ENSG00000164985	1566.36	-0.544573	0.145249	-3.74924	0.00017737	0.00486517	PSIP1
ENSG00000267532	129.134	2.89302	0.771582	3.74946	0.000177216	0.00486517	MIR497HG
ENSG00000100479	179.596	-0.892687	0.238154	-3.74836	0.000177996	0.00487443	POLE2
ENSG00000288044	24.6106	4.21553	1.12477	3.74789	0.000178331	0.00487572	AL096870
ENSG00000043143	2591.57	-0.614476	0.164041	-3.74586	0.000179777	0.00489944	JADE2
ENSG00000109881	141.706	-1.09972	0.293646	-3.74506	0.000180351	0.00490254	CCDC34
ENSG00000162772	1879.77	2.19824	0.586997	3.74489	0.000180471	0.00490254	ATF3
ENSG00000149115	1591.56	0.515568	0.137935	3.73777	0.000185663	0.00502746	TNKS1BP1
ENSG00000177732	168.794	-1.08196	0.289942	-3.73162	0.000190251	0.00513526	SOX12
ENSG00000089486	928.961	-0.588525	0.158623	-3.7102	0.000207094	0.00556326	CDIP1
ENSG00000250722	848.986	-0.714297	0.192617	-3.70838	0.000208587	0.00559449	SELENOP
ENSG00000182628	521.458	-0.648389	0.175092	-3.70313	0.000212953	0.00567562	SKA2
ENSG00000243789	128.996	2.58277	0.697958	3.70046	0.000215207	0.00571767	JMJD7
ENSG00000050030	177.702	-0.940253	0.254316	-3.69718	0.00021801	0.00578308	NEXMIF
ENSG00000154839	153.104	-1.93061	0.522337	-3.69609	0.000218942	0.0057987	SKA1
ENSG00000100219	4220.34	0.709803	0.192063	3.69567	0.000219309	0.00579935	XBP1
ENSG00000163947	798.356	-0.650663	0.17633	-3.69003	0.000224227	0.00591093	ARHGEF3
ENSG00000111181	317.157	0.789594	0.214083	3.68827	0.000225788	0.00593749	SLC6A12
ENSG00000165168	50598.7	-0.587027	0.159168	-3.6881	0.000225936	0.00593749	CYBB
ENSG00000188985	230.139	-0.885324	0.240286	-3.68446	0.000229185	0.00601354	DHFRP1
ENSG00000270959	115.073	1.20409	0.327184	3.68014	0.000233104	0.00610401	LPP-AS2
ENSG00000102001	67.3531	1.96115	0.533047	3.67914	0.000234026	0.00611213	CACNA1F
ENSG00000115137	252.822	1.58349	0.430782	3.67585	0.000237063	0.0061724	DNAJC27
ENSG00000161800	1164.78	-0.831416	0.226312	-3.67375	0.000239016	0.00621368	RACGAP1
ENSG00000129810	96.2498	-1.36901	0.372955	-3.67071	0.000241876	0.00627838	SGO1
ENSG00000130005	541.394	-0.87472	0.238459	-3.66822	0.000244246	0.00632131	GAMT
ENSG00000173801	1473.34	-0.96483	0.263026	-3.66819	0.000244277	0.00632131	JUP
ENSG00000185340	1412.45	-0.61871	0.169039	-3.66015	0.000252067	0.0065008	GAS2L1
ENSG00000096433	206.929	-1.12851	0.30904	-3.65166	0.000260548	0.00667098	ITPR3
ENSG00000105879	1244.44	-0.875328	0.239754	-3.65094	0.00026128	0.00667962	CBLL1
ENSG00000242114	321.283	-0.748371	0.20532	-3.6449	0.000267494	0.00682815	MTFP1
ENSG00000235888	38.6231	2.1029	0.577151	3.64359	0.000268858	0.00685265	AF064858
ENSG00000171570	46.4608	5.55171	1.52584	3.63847	0.00027426	0.0069589	RAB4B-EGLN2
ENSG00000288473	390.391	4.31091	1.18473	3.63871	0.000274006	0.0069589	AL669830
ENSG00000287168	372.163	0.637836	0.175599	3.63234	0.000280858	0.00709958	AL512625
ENSG00000169442	205.028	1.01619	0.279869	3.63096	0.000282371	0.00711138	CD52
ENSG00000156876	265.418	-0.749512	0.206633	-3.62727	0.000286438	0.00719803	SASS6
ENSG00000213347	602.076	-0.581549	0.160426	-3.62503	0.000288926	0.00724413	MXD3
ENSG00000099377	2510.31	0.650404	0.179725	3.61888	0.000295885	0.00739669	HSD3B7
ENSG00000218891	707.456	0.516238	0.142796	3.61521	0.000300099	0.00749097	ZNF579
ENSG00000141576	376.774	-0.915101	0.253155	-3.61478	0.000300598	0.00749237	RNF157
ENSG00000076248	971.204	-0.79325	0.219587	-3.61247	0.000303294	0.00753738	UNG
ENSG00000011677	534.044	-0.872837	0.241936	-3.60771	0.000308907	0.00763028	GABRA3
ENSG00000161642	3594.03	-0.511904	0.141899	-3.60752	0.000309133	0.00763028	ZNF385A
ENSG00000186767	183.534	-1.02052	0.282896	-3.60739	0.000309287	0.00763028	SPIN4
ENSG00000112312	677.746	-0.697358	0.193484	-3.60422	0.000313092	0.00771292	GMNN
ENSG00000112208	363.062	-0.670513	0.186213	-3.60078	0.000317259	0.00780421	BAG2
ENSG00000049246	744.927	-0.741703	0.206048	-3.59966	0.000318629	0.00782496	PER3
ENSG00000110665	220.51	-0.906646	0.252088	-3.59654	0.000322473	0.00789802	C11orf21
ENSG00000172819	375.374	0.638211	0.177579	3.59395	0.0003257	0.00796552	RARG
ENSG00000118308	768.25	-0.630406	0.175616	-3.58968	0.000331079	0.00806292	IRAG2
ENSG00000165480	173.056	-1.29053	0.359551	-3.58928	0.000331588	0.00806292	SKA3
ENSG00000261416	145.122	1.12911	0.314751	3.58731	0.000334108	0.00810091	AC012645
ENSG00000179820	3790.24	0.799913	0.223546	3.5783	0.000345836	0.00836132	MYADM
ENSG00000110841	375.903	0.827388	0.231377	3.57593	0.000348982	0.00841535	PPFIBP1
ENSG00000163221	69.2331	1.92731	0.539222	3.57425	0.000351239	0.00845572	S100A12
ENSG00000171681	2605.46	0.509006	0.1428	3.56447	0.00036459	0.00873982	ATF7IP
ENSG00000111481	4799.9	0.656309	0.18417	3.56361	0.000365791	0.00875622	COPZ1
ENSG00000075618	12673.1	-0.669657	0.188029	-3.56145	0.000368818	0.00877901	FSCN1
ENSG00000255874	591.685	0.561801	0.157735	3.56167	0.000368502	0.00877901	PRECSIT
ENSG00000282608	7098.96	-0.768999	0.216485	-3.55221	0.000382015	0.00906764	ADORA3
ENSG00000115657	418.918	-0.613475	0.173035	-3.54539	0.000392036	0.00926649	ABCB6
ENSG00000225151	40.541	-3.05646	0.862267	-3.54468	0.000393097	0.00927862	GOLGA2P7
ENSG00000162063	425.813	-1.01721	0.287283	-3.54079	0.000398924	0.00938997	CCNF
ENSG00000164951	1100.83	1.11194	0.314149	3.53953	0.000400836	0.00942186	PDP1
ENSG00000154920	180.337	-1.03833	0.293429	-3.53862	0.000402229	0.00944151	EME1
ENSG00000217716	147.667	1.07507	0.303907	3.53749	0.000403947	0.00945561	RPS10P3
ENSG00000163918	571.779	-0.541774	0.153259	-3.53502	0.000407748	0.00951824	RFC4
ENSG00000177946	897.032	0.541467	0.153157	3.53538	0.00040719	0.00951824	CENPBD1
ENSG00000131203	228.774	-1.28396	0.363878	-3.52856	0.000417831	0.00972679	IDO1
ENSG00000087301	566.981	-0.576627	0.163942	-3.51726	0.000436028	0.0100452	TXNDC16
ENSG00000095383	1045.83	0.555256	0.157854	3.51753	0.000435577	0.0100452	TBC1D2
ENSG00000240694	249.892	-1.36201	0.387475	-3.51509	0.000439612	0.0100813	PNMA2
ENSG00000151012	1233.81	0.539557	0.153629	3.51209	0.000444598	0.0101818	SLC7A11
ENSG00000239948	56.279	1.63999	0.467135	3.51074	0.000446861	0.0102198	RN7SL368P
ENSG00000091490	404.007	0.882864	0.252646	3.49446	0.000475014	0.0107763	SEL1L3
ENSG00000224167	93.1817	-1.1951	0.342179	-3.49263	0.000478293	0.0108362	LINC01357
ENSG00000103034	48.5571	1.68725	0.483502	3.48965	0.000483662	0.0109432	NDRG4
ENSG00000165175	4325.08	0.608933	0.17497	3.48021	0.000501028	0.0113059	MID1IP1
ENSG00000181744	1005.07	-0.590285	0.169734	-3.4777	0.000505727	0.0113967	DIPK2A
ENSG00000122861	5084.43	0.569996	0.164333	3.46854	0.000523291	0.0117768	PLAU
ENSG00000287335	342.344	0.625212	0.180319	3.46725	0.000525808	0.0118178	AL139351
ENSG00000112195	142.124	1.22354	0.353577	3.46048	0.000539223	0.0120712	TREML2
ENSG00000138069	10620.8	0.826976	0.238957	3.46077	0.000538626	0.0120712	RAB1A
ENSG00000225217	362.311	-0.936473	0.270735	-3.459	0.000542187	0.0120895	HSPA7
ENSG00000240087	285.752	-0.923941	0.267095	-3.45923	0.00054173	0.0120895	RPSAP12
ENSG00000150551	78.9769	-1.42189	0.41128	-3.45724	0.00054573	0.0121525	LYPD1
ENSG00000183762	976.609	0.519665	0.150455	3.45395	0.000552432	0.0122856	KREMEN1
ENSG00000117643	1627.06	-0.55427	0.160743	-3.44819	0.000564365	0.0125345	MAN1C1
ENSG00000244682	794.682	-0.698712	0.202682	-3.44733	0.000566161	0.01255	FCGR2C
ENSG00000111445	488.751	-0.646666	0.18847	-3.43114	0.00060105	0.0131962	RFC5
ENSG00000140836	5483.56	-0.517245	0.150753	-3.43108	0.000601175	0.0131962	ZFHX3
ENSG00000187037	87.7047	-1.52013	0.443116	-3.43054	0.00060238	0.0132056	GPR141
ENSG00000137757	157.053	-1.04492	0.305081	-3.42506	0.000614667	0.0134575	CASP5
ENSG00000255224	79.8096	1.28467	0.375298	3.42307	0.000619182	0.0135039	AC109322
ENSG00000149503	1460.58	-0.503063	0.147069	-3.42059	0.000624863	0.0135928	INCENP
ENSG00000261210	850.767	-0.712801	0.20852	-3.41839	0.000629927	0.0136678	CLEC19A
ENSG00000227825	485.123	0.815516	0.239069	3.41121	0.000646749	0.0140148	SLC9A7P1
ENSG00000068615	109.796	-1.20895	0.354774	-3.40765	0.000655242	0.0141807	REEP1
ENSG00000160813	536.418	0.745383	0.219056	3.4027	0.000667235	0.0143851	PPP1R35
ENSG00000185880	2535.5	-0.505739	0.148667	-3.40182	0.000669386	0.0144131	TRIM69
ENSG00000177409	8321.25	-0.815563	0.239902	-3.39957	0.000674916	0.0144942	SAMD9L
ENSG00000283293	30.0172	-3.23945	0.952832	-3.39981	0.000674323	0.0144942	RN7SK
ENSG00000128594	1794.11	-0.623619	0.183574	-3.3971	0.000681037	0.0145897	LRRC4
ENSG00000198879	2845.65	-0.994632	0.292963	-3.39508	0.00068608	0.0146422	SFMBT2
ENSG00000108556	209.95	0.82642	0.243632	3.39208	0.000693643	0.0147849	CHRNE
ENSG00000197461	1142.11	0.664046	0.195908	3.38959	0.000699976	0.0149011	PDGFA
ENSG00000116984	3073.48	-0.59837	0.176906	-3.38241	0.000718522	0.0152194	MTR
ENSG00000283761	299.956	3.70978	1.09927	3.37478	0.000738757	0.0155507	AC118553
ENSG00000113328	1357.15	-0.637563	0.189059	-3.37229	0.000745448	0.015672	CCNG1
ENSG00000019169	5272.78	0.971279	0.288576	3.36577	0.00076331	0.0160264	MARCO
ENSG00000140479	625.364	0.911048	0.270819	3.36405	0.000768065	0.0160875	PCSK6
ENSG00000146592	622.311	1.3129	0.390616	3.36109	0.000776341	0.0161609	CREB5
ENSG00000198492	2846.58	0.978315	0.291052	3.36131	0.000775749	0.0161609	YTHDF2
ENSG00000123975	566.585	-0.647781	0.192847	-3.35903	0.000782159	0.0162221	CKS2
ENSG00000258727	411.065	0.568041	0.16909	3.35939	0.000781134	0.0162221	AL135999
ENSG00000160224	38.6488	2.01214	0.599499	3.35638	0.000789714	0.0163588	AIRE
ENSG00000171227	668.546	-0.589859	0.175848	-3.35437	0.00079546	0.0164577	TMEM37
ENSG00000109084	635.712	-0.900409	0.268809	-3.34962	0.000809231	0.0167017	TMEM97
ENSG00000170891	77.7247	-1.55852	0.4658	-3.3459	0.000820158	0.0169066	CYTL1
ENSG00000104147	86.1258	-1.22069	0.365155	-3.34293	0.000828977	0.0170469	OIP5
ENSG00000277258	203.805	-0.958638	0.286752	-3.34309	0.000828519	0.0170469	PCGF2
ENSG00000267904	14.2526	6.98124	2.08902	3.34188	0.000832145	0.0170913	AC024075
ENSG00000143797	74.5312	-1.56565	0.468634	-3.34088	0.000835146	0.0171114	MBOAT2
ENSG00000041982	321.087	0.874545	0.261918	3.339	0.000840794	0.0171648	TNC
ENSG00000196074	201.795	-0.953217	0.285475	-3.33905	0.00084065	0.0171648	SYCP2
ENSG00000164087	437.391	-0.735883	0.220447	-3.33814	0.000843403	0.0171973	POC1A
ENSG00000064886	164.132	1.36524	0.409498	3.33394	0.000856257	0.0173835	CHI3L2
ENSG00000127418	1435.84	0.649712	0.194886	3.33381	0.000856644	0.0173835	FGFRL1
ENSG00000176597	3340.06	1.06899	0.321011	3.33007	0.000868232	0.0175765	B3GNT5
ENSG00000206760	23.0824	4.5928	1.38146	3.3246	0.000885453	0.0179037	SNORA6
ENSG00000162645	3885.7	-0.531116	0.159771	-3.32424	0.000886607	0.0179057	GBP2
ENSG00000094804	368.728	-1.07115	0.322594	-3.32042	0.000898819	0.0181091	CDC6
ENSG00000048052	872.593	-0.585192	0.176404	-3.31735	0.000908762	0.0182876	HDAC9
ENSG00000163629	592.823	-0.558663	0.168565	-3.31423	0.000918959	0.0184709	PTPN13
ENSG00000243232	200.688	1.48974	0.450054	3.31014	0.00093249	0.0186546	PCDHAC2
ENSG00000170323	169.972	0.949696	0.287198	3.30676	0.000943803	0.0187917	FABP4
ENSG00000259642	315.607	0.775606	0.234696	3.30473	0.000950668	0.0188839	ST20-AS1
ENSG00000217801	100.029	1.43542	0.434488	3.30371	0.000954161	0.0189311	AL390719
ENSG00000241859	92.7035	-1.14629	0.34729	-3.30067	0.000964549	0.0190924	ANOS2P
ENSG00000006327	1038.91	0.926958	0.281174	3.29674	0.000978124	0.0193385	TNFRSF12A
ENSG00000119969	518.244	-0.890774	0.270343	-3.29498	0.000984275	0.0194148	HELLS
ENSG00000109743	964.71	0.501818	0.1524	3.29276	0.000992086	0.0195233	BST1
ENSG00000005189	219.814	-0.953427	0.289859	-3.28928	0.00100444	0.0197206	REXO5
ENSG00000026025	223808	0.503913	0.153261	3.28795	0.0010092	0.0197368	VIM
ENSG00000172380	576.257	0.500186	0.152287	3.2845	0.00102162	0.0199192	GNG12
ENSG00000258376	286.964	0.685736	0.208802	3.28414	0.00102295	0.0199222	AC004846
ENSG00000151006	120.793	1.31363	0.40011	3.28317	0.00102645	0.0199674	PRSS53
ENSG00000017483	613.781	-0.547717	0.167094	-3.27791	0.0010458	0.0202972	SLC38A5
ENSG00000116717	81.274	-1.60068	0.488476	-3.27689	0.00104957	0.0203469	GADD45A
ENSG00000188807	618.804	-0.574751	0.175513	-3.27469	0.00105778	0.0204826	TMEM201
ENSG00000187951	124.852	-1.24225	0.379793	-3.27086	0.0010722	0.0207382	AC091057
ENSG00000160298	123.749	-1.07527	0.329742	-3.26094	0.00111043	0.0214043	C21orf58
ENSG00000135045	246.7	-0.829158	0.254319	-3.2603	0.00111293	0.021422	C9orf40
ENSG00000108825	263.672	5.88371	1.80555	3.25868	0.00111932	0.0214535	PTGES3L-AARSD1
ENSG00000000003	53.268	1.69579	0.52066	3.25701	0.00112593	0.0215557	TSPAN6
ENSG00000267493	114.03	1.12541	0.345781	3.2547	0.00113513	0.0217073	CIRBP-AS1
ENSG00000132016	107.358	-1.1437	0.351566	-3.25316	0.0011413	0.0218007	C19orf57
ENSG00000052126	263.827	0.789942	0.242882	3.25237	0.00114447	0.021812	PLEKHA5
ENSG00000253161	53.4952	1.77356	0.546101	3.24768	0.00116349	0.0220998	LINC01605
ENSG00000117155	357.21	-0.63876	0.196975	-3.24285	0.00118341	0.022453	SSX2IP
ENSG00000176208	395.648	-0.583821	0.180053	-3.24249	0.0011849	0.0224559	ATAD5
ENSG00000134291	1154.59	-0.7402	0.228508	-3.23927	0.00119836	0.0225848	TMEM106C
ENSG00000167747	445.005	0.607169	0.187521	3.23787	0.00120427	0.0226709	C19orf48
ENSG00000271122	411.983	0.619659	0.191621	3.23377	0.0012217	0.0229478	AC018647
ENSG00000115129	992.543	0.734482	0.227248	3.23208	0.00122894	0.0230074	TP53I3
ENSG00000226137	1417.21	0.5374	0.166398	3.22961	0.0012396	0.0231376	BAIAP2-DT
ENSG00000214826	165.36	-0.865091	0.268035	-3.22753	0.00124865	0.0232099	DDX12P
ENSG00000198797	77.8523	-1.60214	0.497316	-3.22158	0.00127486	0.0236576	BRINP2
ENSG00000128609	1517.93	-0.566715	0.175949	-3.2209	0.00127788	0.0236876	NDUFA5
ENSG00000183742	697.183	-0.526357	0.163463	-3.22003	0.00128177	0.0237338	MACC1
ENSG00000189362	604.531	-0.538508	0.167637	-3.21234	0.00131657	0.024282	NEMP2
ENSG00000231964	128.154	0.909582	0.283163	3.21222	0.00131711	0.024282	AL731567
ENSG00000135482	1050.84	0.520819	0.162272	3.20955	0.00132944	0.0244293	ZC3H10
ENSG00000185252	333.244	-0.662363	0.206855	-3.20207	0.00136444	0.024964	ZNF74
ENSG00000159214	273.469	0.796177	0.248716	3.20114	0.00136883	0.0250174	CCDC24
ENSG00000144395	80.7111	-1.27012	0.397012	-3.19921	0.00137807	0.0251319	CCDC150
ENSG00000223855	30.5603	2.22505	0.69626	3.19572	0.00139482	0.0253827	HRAT92
ENSG00000259436	33.4223	-1.60855	0.503925	-3.19204	0.00141274	0.0256812	AC010247
ENSG00000257605	215.319	0.736126	0.230789	3.1896	0.00142469	0.025843	MYG1-AS1
ENSG00000188549	2192.62	0.72544	0.227952	3.18243	0.00146046	0.0264503	CCDC9B
ENSG00000274712	285.242	0.834413	0.262224	3.18206	0.00146231	0.0264503	AC005332
ENSG00000119333	345.584	-0.708301	0.222838	-3.17854	0.00148018	0.0266176	WDR34
ENSG00000172731	125.196	-1.0586	0.333161	-3.17745	0.00148576	0.0266386	LRRC20
ENSG00000178922	393.608	-0.549105	0.172831	-3.17712	0.00148744	0.0266386	HYI
ENSG00000277147	237.46	0.747487	0.235301	3.17673	0.00148945	0.0266464	LINC00869
ENSG00000132510	1265.01	0.52478	0.165437	3.17208	0.00151352	0.0270198	KDM6B
ENSG00000013573	577.152	-0.93085	0.294414	-3.16171	0.00156846	0.0278607	DDX11
ENSG00000120334	302.042	-0.584041	0.184782	-3.16071	0.00157385	0.0278805	CENPL
ENSG00000253227	41.9762	2.35085	0.74382	3.16051	0.00157491	0.0278805	AC090192
ENSG00000273604	467.276	-0.573093	0.181309	-3.16086	0.00157304	0.0278805	EPOP
ENSG00000214900	93.7904	1.65996	0.525842	3.15677	0.00159529	0.0282117	LINC01588
ENSG00000085840	482.921	-0.783861	0.248426	-3.15532	0.00160324	0.0282402	ORC1
ENSG00000114346	794.921	-0.608129	0.192772	-3.15465	0.00160691	0.0282402	ECT2
ENSG00000163291	1216.76	-0.877883	0.27817	-3.15592	0.00159993	0.0282402	PAQR3
ENSG00000167037	103.773	-1.19153	0.377703	-3.15468	0.00160673	0.0282402	SGSM1
ENSG00000010404	8802.66	-0.899679	0.285502	-3.15121	0.00162594	0.0284564	IDS
ENSG00000198520	59.2093	1.6861	0.535745	3.14721	0.00164839	0.0288196	ARMH1
ENSG00000157303	703.944	-1.11207	0.353424	-3.14656	0.00165206	0.0288539	SUSD3
ENSG00000101017	2216.03	0.50549	0.160718	3.14519	0.00165977	0.0289587	CD40
ENSG00000119326	334.01	-0.86759	0.276376	-3.13916	0.00169432	0.02944	CTNNAL1
ENSG00000196267	272.546	0.780787	0.24903	3.13532	0.00171668	0.029798	ZNF836
ENSG00000222014	146.477	-0.946552	0.302185	-3.13236	0.00173408	0.0299296	RAB6C
ENSG00000196547	2872.2	0.562157	0.179504	3.13173	0.00173778	0.0299346	MAN2A2
ENSG00000170734	924.541	-0.59041	0.188619	-3.13017	0.00174704	0.0300171	POLH
ENSG00000274756	21.4874	2.38078	0.763616	3.11778	0.0018222	0.031025	AC243732
ENSG00000235912	135.62	1.14126	0.366387	3.11489	0.00184012	0.0312672	AL031729
ENSG00000116667	75.348	-1.64023	0.526693	-3.1142	0.00184444	0.0313093	C1orf21
ENSG00000111981	35.091	2.24252	0.720439	3.11271	0.00185379	0.031405	ULBP1
ENSG00000128918	3463.1	0.582828	0.187262	3.11237	0.00185592	0.0314096	ALDH1A2
ENSG00000234232	184.551	0.795742	0.255721	3.11176	0.00185973	0.0314426	AC243772
ENSG00000163347	594.814	0.730117	0.234691	3.11098	0.0018647	0.0314953	CLDN1
ENSG00000100926	1481.82	0.971693	0.312532	3.1091	0.00187661	0.0316647	TM9SF1
ENSG00000166963	281.462	-0.860865	0.277331	-3.10411	0.00190853	0.0320754	MAP1A
ENSG00000211455	2367.73	0.642687	0.207023	3.10442	0.00190654	0.0320754	STK38L
ENSG00000198885	267.558	-0.886337	0.28612	-3.09778	0.00194973	0.0326705	ITPRIPL1
ENSG00000182541	3778.27	-0.659618	0.213111	-3.09519	0.0019669	0.0328931	LIMK2
ENSG00000197978	148.124	1.09527	0.354051	3.09353	0.00197792	0.0330122	GOLGA6L9
ENSG00000165617	178.303	0.845526	0.273464	3.09191	0.00198876	0.0330951	DACT1
ENSG00000186193	147.531	-1.54455	0.49951	-3.09214	0.00198722	0.0330951	SAPCD2
ENSG00000115163	85.5122	-1.31613	0.425916	-3.09011	0.00200086	0.0332638	CENPA
ENSG00000267416	21.502	2.96942	0.962279	3.08582	0.00202994	0.0337142	AC025048
ENSG00000198133	169.575	-1.0626	0.344775	-3.08202	0.00205601	0.0340137	TMEM229B
ENSG00000180953	115.039	1.17065	0.380069	3.0801	0.0020693	0.0341666	ST20
ENSG00000112182	31.6967	1.89025	0.613761	3.07977	0.00207157	0.0341708	BACH2
ENSG00000197903	190.197	0.891592	0.289616	3.07853	0.00208021	0.03428	H2BC12
ENSG00000284690	54.8645	1.40721	0.457261	3.07748	0.00208762	0.0343686	CD300H
ENSG00000004468	475.657	-1.0908	0.354703	-3.07525	0.00210329	0.0345231	CD38
ENSG00000105516	141.466	-0.915689	0.297815	-3.07469	0.0021072	0.0345231	DBP
ENSG00000166106	426.913	0.632024	0.205539	3.07496	0.00210529	0.0345231	ADAMTS15
ENSG00000105639	1008.25	-0.800696	0.260586	-3.07268	0.00212147	0.0346858	JAK3
ENSG00000235944	147.053	0.945183	0.307613	3.07264	0.00212174	0.0346858	ZNF815P
ENSG00000273038	87.2164	1.19067	0.388297	3.0664	0.00216652	0.0351902	AL365203
ENSG00000179085	263.209	0.768939	0.250894	3.0648	0.00217818	0.0353099	DPM3
ENSG00000272578	527.456	-0.925585	0.302629	-3.05848	0.00222464	0.0359255	AP000347
ENSG00000232160	211.209	1.00904	0.329953	3.05813	0.00222721	0.0359326	RAP2C-AS1
ENSG00000109065	976.698	0.520647	0.170391	3.05561	0.00224605	0.0361196	NAT9
ENSG00000176658	507.757	0.619457	0.202714	3.05582	0.00224447	0.0361196	MYO1D
ENSG00000278600	238.922	0.646993	0.212153	3.04966	0.00229102	0.0366824	AC015871
ENSG00000182362	375.689	0.786091	0.258517	3.04077	0.00235972	0.0374847	YBEY
ENSG00000269925	54.5149	1.41851	0.467158	3.03648	0.00239361	0.0377889	Z98884
ENSG00000008517	192.75	-0.822018	0.271052	-3.03269	0.00242381	0.0381586	IL32
ENSG00000196172	207.542	-0.878556	0.289727	-3.03236	0.00242653	0.038166	ZNF681
ENSG00000138435	64.6118	-1.56348	0.515962	-3.03023	0.00244371	0.0383502	CHRNA1
ENSG00000165949	2963.61	-0.748099	0.246892	-3.03006	0.00244504	0.0383502	IFI27
ENSG00000279730	64.8866	1.29399	0.42721	3.02894	0.00245416	0.0384576	KMT5AP1
ENSG00000144445	649.954	0.605978	0.200435	3.02331	0.00250025	0.0389635	KANSL1L
ENSG00000269837	72.1419	2.49534	0.82534	3.02341	0.00249941	0.0389635	IPO5P1
ENSG00000086544	682.416	0.515559	0.170658	3.021	0.00251943	0.0391846	ITPKC
ENSG00000215126	769.985	0.551071	0.182437	3.02062	0.00252259	0.0391846	CBWD6
ENSG00000081059	41.9159	-1.46923	0.486492	-3.02006	0.00252724	0.0392035	TCF7
ENSG00000203760	325.264	-0.587874	0.194704	-3.01933	0.00253337	0.0392626	CENPW
ENSG00000234512	31.3414	2.08114	0.690634	3.01338	0.00258356	0.0400038	TLR12P
ENSG00000145147	187.758	-0.946992	0.314692	-3.00926	0.00261881	0.0404387	SLIT2
ENSG00000287823	22.0742	2.21376	0.736026	3.00772	0.00263219	0.0406082	AL603783
ENSG00000095932	37.8909	1.929	0.641743	3.00587	0.00264822	0.0408182	SMIM24
ENSG00000128284	391.22	-0.843657	0.280791	-3.00457	0.00265958	0.040956	APOL3
ENSG00000113249	45.0076	1.54135	0.51364	3.00083	0.00269247	0.0413826	HAVCR1
ENSG00000159450	42.8328	1.56434	0.521346	3.00058	0.00269462	0.0413826	TCHH
ENSG00000163666	81.5583	-1.17051	0.390828	-2.99495	0.00274489	0.0420402	HESX1
ENSG00000122254	531.433	-0.683746	0.228433	-2.9932	0.0027607	0.0421369	HS3ST2
ENSG00000018189	1326.88	-0.639776	0.21385	-2.9917	0.00277428	0.0422991	RUFY3
ENSG00000104213	87.8577	-1.17279	0.392564	-2.98751	0.00281259	0.0427676	PDGFRL
ENSG00000150787	560.456	0.5507	0.184523	2.98446	0.0028408	0.0430782	PTS
ENSG00000189180	550.256	0.995219	0.333496	2.9842	0.0028432	0.0430782	ZNF33A
ENSG00000117594	85.6343	1.24688	0.418056	2.98257	0.00285844	0.0432107	HSD11B1
ENSG00000119139	405.246	-1.36283	0.456992	-2.98217	0.00286216	0.0432107	TJP2
ENSG00000167397	3083.97	0.663179	0.222446	2.9813	0.00287029	0.0432948	VKORC1
ENSG00000279393	14.7457	3.61213	1.21354	2.97652	0.00291539	0.0438579	AL139005
ENSG00000219607	276.838	0.799396	0.268624	2.9759	0.00292134	0.0438988	PPP1R3G
ENSG00000213468	92.8824	-1.1404	0.383468	-2.97392	0.00294018	0.0441131	FIRRE
ENSG00000166974	3409.32	-0.549135	0.184833	-2.97098	0.0029685	0.04442	MAPRE2
ENSG00000259332	28.7315	4.97114	1.67434	2.96901	0.00298761	0.0445553	ST20-MTHFS
ENSG00000050438	669.816	0.833429	0.280813	2.96792	0.00299825	0.0446676	SLC4A8
ENSG00000196220	343.749	-0.782576	0.264055	-2.96369	0.00303974	0.0451268	SRGAP3
ENSG00000188493	604.413	-0.580225	0.195925	-2.96146	0.00306181	0.0453232	C19orf54
ENSG00000131015	429.532	0.615269	0.208311	2.95361	0.00314083	0.0464098	ULBP2
ENSG00000186603	30.0748	-1.85825	0.629569	-2.95163	0.00316106	0.0465233	HPDL
ENSG00000186998	23.7448	-2.43296	0.824286	-2.9516	0.0031613	0.0465233	EMID1
ENSG00000172936	9899.16	0.814127	0.275925	2.95053	0.00317224	0.0465436	MYD88
ENSG00000183044	764.242	0.507724	0.172144	2.94942	0.00318368	0.0466499	ABAT
ENSG00000239883	167.631	-0.804194	0.272736	-2.94862	0.00319198	0.046731	PARGP1
ENSG00000109339	449.661	-0.500196	0.169751	-2.94665	0.00321231	0.0468666	MAPK10
ENSG00000140749	2152.08	-0.663883	0.2254	-2.94536	0.00322583	0.0469828	IGSF6
ENSG00000113448	382.87	0.583388	0.198203	2.94338	0.00324651	0.0471218	PDE4D
ENSG00000215784	242.206	-0.972478	0.330474	-2.94268	0.00325387	0.047188	FAM72D
ENSG00000089916	3026.5	-0.741091	0.252029	-2.9405	0.00327687	0.0474404	GPATCH2L
ENSG00000105281	7208.31	0.56975	0.193807	2.93978	0.00328447	0.0475097	SLC1A5
ENSG00000135318	96.851	1.23674	0.421041	2.93733	0.00331048	0.0477228	NT5E
ENSG00000182606	3951.61	-0.519078	0.176711	-2.93745	0.00330926	0.0477228	TRAK1
ENSG00000179978	563.114	-0.743502	0.253182	-2.93663	0.003318	0.0477905	NAIPP2
ENSG00000278834	28.7997	3.37529	1.14977	2.93561	0.00332887	0.0479063	AC073508
ENSG00000165548	783.927	-0.597056	0.203718	-2.9308	0.0033809	0.0485724	TMEM63C
ENSG00000102524	1349.4	-0.901733	0.307843	-2.9292	0.00339839	0.0487409	TNFSF13B
ENSG00000232060	47.9588	2.21476	0.756825	2.92638	0.00342936	0.0490525	SLC4A1APP1
ENSG00000188157	6091.48	-0.777908	0.266197	-2.9223	0.00347461	0.049582	AGRN
